# Supplementary material for: Selective C–H functionalizations of arenes catalyzed by poly NHC–Pd in flow
Source: Royal Society of Chemistry journal article supplement (doi:10.1039/d4re00140k), 2024-01-01

## Supporting Information

# Selective C-H functionalizations of arenes catalyzed by poly NHC-Pd in flow

Shiqi Huang<sup>a,b,c</sup>, Runqi Hao<sup>a,b</sup>, Qiao Li<sup>b,c</sup>, Li Wan<sup>\*b</sup>, Fener Chen<sup>\*a,b,c</sup>

<sup>a</sup> School of Pharmaceutical Sciences, Institute of Drug Discovery and Development, Zhengzhou University, Zhengzhou 450001, China

<sup>b</sup> Engineering Center of Catalysis and Synthesis for Chiral Molecules, Department of Chemistry, Fudan University, Shanghai 200433, China

<sup>c</sup> College of Chemistry and Chemical Engineering, Jiangxi Normal University, Nanchang 330022, China

\* Corresponding Emails: liwan126 @126.com; rfchen@fudan.edu.cn

## Table of Contents

|                                                                      |    |
|----------------------------------------------------------------------|----|
| 1. Supporting Tables.....                                            | 3  |
| 2. General Information.....                                          | 6  |
| 3. Flow Experimental Equipment Information.....                      | 6  |
| 4. Synthesis of NHCs.....                                            | 7  |
| 5. Synthesis of NHC-Pds.....                                         | 8  |
| 6. Synthesis of Poly NHC-Pd Catalysts.....                           | 10 |
| 7. C-H acetoxylation of 2-Phenylpyridine compounds.....              | 11 |
| 8. C-H acetoxylation of arenes using different directing groups..... | 22 |
| 9. C-H Iodination of 2-Phenylpyridine.....                           | 29 |
| 10. C-H Nitrosation of 2-Phenylpyridine.....                         | 30 |
| 11. X-Ray Crystallography of NHC-Pds.....                            | 32 |
| 12. Image of the Flow System.....                                    | 36 |
| 13. References.....                                                  | 37 |
| 14. NMR Spectra.....                                                 | 38 |

## 1. Supporting Tables

**Table S1.** Optimizations of selective acetoxylation in batch

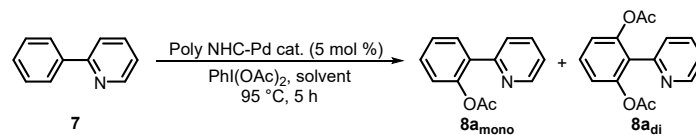

| Entry           | Poly cat. | Solvent                             | PhI(OAc) <sub>2</sub><br>(equiv.) | Yield (%) <sup>a</sup>   |                        |
|-----------------|-----------|-------------------------------------|-----------------------------------|--------------------------|------------------------|
|                 |           |                                     |                                   | <b>8a<sub>mono</sub></b> | <b>8a<sub>di</sub></b> |
| 1               | 4         | DCE                                 | 1.5                               | 21                       | 4                      |
| 2               | 4         | DCM                                 | 1.5                               | 26                       | 32                     |
| 3               | 5         | DCM                                 | 1.5                               | 31                       | 40                     |
| 4               | 6         | DCM                                 | 1.5                               | 28                       | 35                     |
| 5               | 5         | CH <sub>3</sub> CN                  | 1.5                               | 1.1                      | 0                      |
| 6               | 5         | THF                                 | 1.5                               | 0                        | 0                      |
| 7               | 5         | 1,4-dioxane                         | 1.5                               | 0                        | 0                      |
| 8               | 5         | DMF                                 | 1.5                               | 0                        | 0                      |
| 9               | 5         | AcOH                                | 1.5                               | 0                        | 0                      |
| 10              | 5         | Ac <sub>2</sub> O                   | 1.5                               | 32                       | 46                     |
| 11              | 5         | Toluene                             | 1.5                               | 9                        | 61                     |
| 12              | 5         | HFIP                                | 1.5                               | 4                        | 0                      |
| 13              | 5         | DCM/Ac <sub>2</sub> O <sup>b</sup>  | 1.5                               | 32                       | 48                     |
| 14              | 5         | AcOH/Ac <sub>2</sub> O <sup>b</sup> | 1.5                               | 31                       | 54                     |
| 15              | 5         | AcOH/Ac <sub>2</sub> O <sup>b</sup> | 1.4                               | 33                       | 49                     |
| 16              | 5         | AcOH/Ac <sub>2</sub> O <sup>b</sup> | 1.3                               | 38                       | 30                     |
| 17 <sup>c</sup> | 5         | AcOH/Ac <sub>2</sub> O <sup>b</sup> | 1.5                               | 0                        | 0                      |

<sup>a</sup> Yields were determined by LC-MS internal standard method with mesitylene. <sup>b</sup> The volume ratio of co-solvent was 1:1. <sup>c</sup> No catalyst was added.

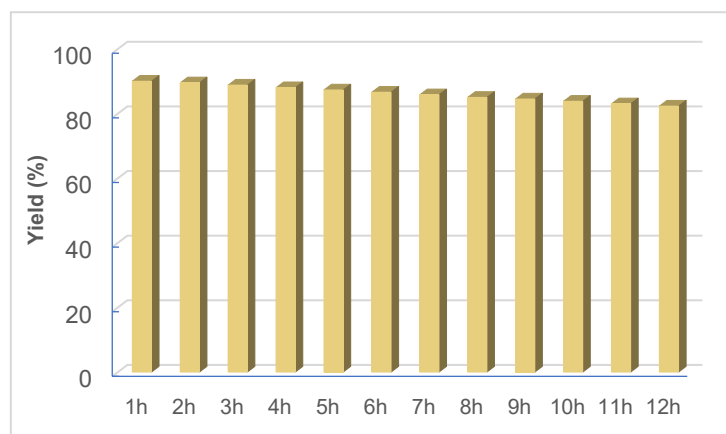

**Fig. S1** The continuous operation of flow acetoxylation.

**Table S2.** Optimizations of selective iodination in batch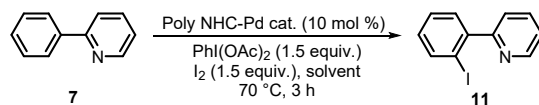

| Entry           | Poly cat. | Solvent                 | Time (h) | Yield (%) <sup>a</sup> |
|-----------------|-----------|-------------------------|----------|------------------------|
| 1               | 5         | DCE                     | 3        | 81                     |
| 2               | 5         | DCM                     | 3        | 29                     |
| 3               | 4         | DCE                     | 3        | 65                     |
| 4               | 6         | DCE                     | 3        | 70                     |
| 5               | 5         | CH <sub>3</sub> CN      | 3        | 55                     |
| 6               | 5         | NMP                     | 3        | 71                     |
| 7               | 5         | 1,4-dioxane             | 3        | 83                     |
| 8               | 5         | DMF                     | 3        | 84                     |
| 9               | 5         | AcOH                    | 3        | 0                      |
| 10              | 5         | HFIP                    | 3        | 52                     |
| 11              | 5         | DCE/HFIP<br>(v:v = 2:1) | 3        | 70                     |
| 12              | 5         | DCE/HFIP<br>(v:v = 4:1) | 3        | 88                     |
| 13              | 5         | DCE/HFIP<br>(v:v = 6:1) | 3        | 82                     |
| 14              | 5         | DCE/HFIP<br>(v:v = 4:1) | 1        | 91                     |
| 15 <sup>b</sup> | 5         | DCE/HFIP<br>(v:v = 4:1) | 1        | 0                      |
| 16 <sup>c</sup> | 5         | DCE/HFIP<br>(v:v = 4:1) | 1        | 0                      |

<sup>a</sup> Yields were determined by LC-MS internal standard method with mesitylene. <sup>b</sup> The reaction was carried out in the absence of catalyst. <sup>c</sup> The reaction was carried out in the absence of I<sub>2</sub>.

**Table S3.** Optimizations of selective iodination in flow using packed-bed reactor.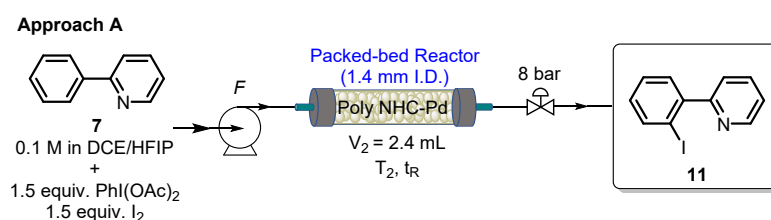

| Entry | T (°C) | t <sub>R</sub> (min) | F (mL/min) | Yield (%) <sup>a</sup> |
|-------|--------|----------------------|------------|------------------------|
| 1     | 70     | 15                   | 0.16       | 38                     |
| 2     | 80     | 15                   | 0.16       | 50                     |
| 3     | 90     | 15                   | 0.16       | 61                     |

|   |     |    |      |                     |
|---|-----|----|------|---------------------|
| 4 | 100 | 15 | 0.16 | 69(60) <sup>b</sup> |
| 5 | 105 | 15 | 0.16 | 66                  |
| 6 | 100 | 10 | 0.24 | 64                  |

<sup>a</sup> Yields were determined by LC-MS internal standard method with mesitylene. <sup>b</sup> Isolated yield.

**Table S4.** Optimizations of selective iodination in flow using PTFE coil reactor.

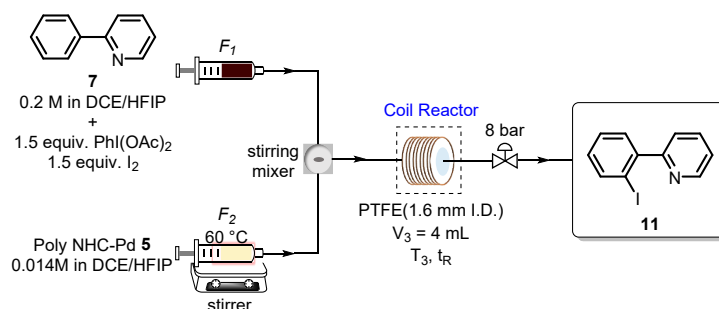

| Entry | T <sub>3</sub> (°C) | t <sub>R</sub> (min) | F <sub>1</sub> (mL/min) | F <sub>2</sub> (mL/min) | Yield (%) <sup>a</sup> |
|-------|---------------------|----------------------|-------------------------|-------------------------|------------------------|
| 1     | 80                  | 15                   | 0.13                    | 0.13                    | 61                     |
| 2     | 90                  | 15                   | 0.13                    | 0.13                    | 73                     |
| 3     | 100                 | 15                   | 0.13                    | 0.13                    | 79                     |
| 4     | 105                 | 15                   | 0.13                    | 0.13                    | 78                     |
| 5     | 105                 | 10                   | 0.2                     | 0.2                     | 88(80) <sup>b</sup>    |
| 6     | 105                 | 8                    | 0.25                    | 0.25                    | 75                     |

<sup>a</sup> Yields were determined by LC-MS internal standard method with mesitylene. <sup>b</sup> Isolated yield.

**Table S5.** Optimizations of selective nitrosation in flow using packed-bed reactor.

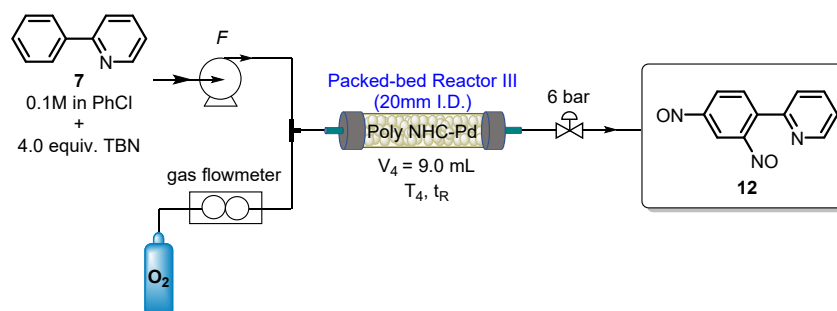

| Entry | T <sub>4</sub> (°C) | t <sub>R</sub> (min) | O <sub>2</sub> (sccm) | F (mL/min) | Yield (%) <sup>a</sup> |
|-------|---------------------|----------------------|-----------------------|------------|------------------------|
| 1     | 90                  | 6                    | 5.0                   | 0.6        | 57                     |
| 2     | 100                 | 6                    | 5.0                   | 0.6        | 69                     |
| 3     | 105                 | 6                    | 5.0                   | 0.6        | 85(78) <sup>b</sup>    |
| 4     | 110                 | 6                    | 5.0                   | 0.6        | 79                     |
| 5     | 105                 | 9                    | 3.4                   | 0.4        | 68                     |
| 6     | 105                 | 4                    | 7.6                   | 0.9        | 72                     |

<sup>a</sup> Yields were determined by LC-MS internal standard method with mesitylene. <sup>b</sup> Isolated yield.

## 2. General Information

Unless otherwise noted, solvents were purified according to standard methods prior to use. All the reactions were monitored by thin-layer chromatography (TLC) and LC-MS (Agilent 1260 Infinity II with an Agilent InfinityLab LC/MSD series, Agilent Proshel120 EC-C18, RRHD 2.7  $\mu\text{m}$ ,  $2.1 \times 50$  mm). The column chromatography characterization was performed with silica gel (200-300 mesh). All new compounds were characterized by NMR spectroscopy, high resolution mass spectroscopy (HRMS).  $^1\text{H}$  NMR spectra were recorded at 400 MHz and  $^{13}\text{C}$  NMR spectra were recorded at 100 MHz (Bruker Avance 400). Chemical shifts are reported in ppm downfield from  $\text{CDCl}_3$  ( $\delta = 7.26$  ppm),  $\text{DMSO-}d_6$  ( $\delta = 2.50$  ppm), and  $\text{CD}_3\text{OD}$  ( $\delta = 3.31$  ppm) for  $^1\text{H}$  NMR and relative to the central  $\text{CDCl}_3$  resonance ( $\delta = 77.16$  ppm), the central  $\text{DMSO-}d_6$  resonance ( $\delta = 39.50$  ppm), and the central  $\text{CD}_3\text{OD}$  resonance ( $\delta = 49.00$  ppm) for  $^{13}\text{C}$  NMR spectroscopy. Coupling constants are given in Hz. The following abbreviations were used to identify the multiplicities: s = singlet, d = doublet, t = triplet, m = multiplet. HRMS spectra were recorded on a Bruker microTOF spectrometer with electrospray ionization (ESI). X-Ray crystallographic structure was recorded on a Bruker D8 VENTURE MetalJet X-ray single crystal diffractometer. SEM was recorded on ZEISS Sigma 300. TEM was recorded on JEOL JEM-2100Plus. ICP-OES was recorded on Agilent 720ES.

## 3. Flow Experimental Equipment Information

The continuous flow system was established, which include commercial available feeding equipments, continuous reactors and process control unit etc.

The main devices information is as follows:

**Feeding equipments:** syringe pump (Fusion 4000, CHEMYX), plunger pump (AP0010, SANOTAC).

**Continuous reactors:** stainless steel (SS) packed bed (MF200, Shen zhen E-Zheng tech Co., Ltd), PTFE coil reactor (0.8 mm I.D. and 1.6 mm I.D.) and PTFE fittings (Run Ze Fluid), stainless steel (SS) coil reactor (0.6 mm I.D.) and stainless steel fittings (Shang hai Xitai Fluid Technology Co.,

Ltd) and High-precision temperature chamber(Jiangsu Hengmin Instrument Manufacturing Co., Ltd).

**Process control unit:** back-pressure valve (0-300 psi, FAV-300B, Shen zhen insftch), heating tapes (L = 250mm, W =10 mm, U = 220 v, P = 120 w).

## 4. Synthesis of NHCs

### 4.1 Experimental procedures

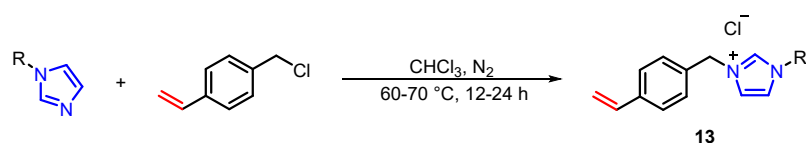

To a 25 mL round bottom flask, imidazole (10.0 mmol, 1.0 equiv.) was added. The flask was evacuated and backfilled with N<sub>2</sub> (3 cycles), then a solution of 4-vinylbenzyl chloride (11.0 mmol, 1.1 equiv.) in 15 mL dry chloroform were added. The mixture was stirred at 60-70 °C for 12-24 h. Then the reaction mixture was removed in vacuum. The resulting residue was purified by short silica column flash chromatography (DCM/MeOH = 30:1) to give the corresponding NHCs (**13**).<sup>[1]</sup>

### 4.2 Characterization data of NHCs

1-phenyl-3-(4-vinylbenzyl)-1H-imidazol-3-ium chloride (**13a**)<sup>[2]</sup>

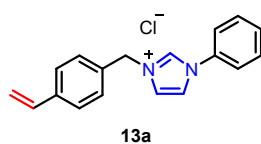

2.8 g, 95% yield

**Physical State:** pale yellow solid

**<sup>1</sup>H NMR** (400 MHz, DMSO-*d*<sub>6</sub>) δ 10.30 (s, 1H), 8.38 (s, 1H), 8.09 (s, 1H), 7.83 (d, J = 8.0 Hz, 2H), 7.66 (t, J = 7.6 Hz, 2H), 7.59 (d, J = 7.6 Hz, 1H), 7.54 (s, 4H), 6.75 (dd, J = 11.2, 6.8 Hz, 1H), 5.88 (d, J = 17.6 Hz, 1H), 5.53 (s, 2H), 5.30 (d, J = 11.2 Hz, 1H).

**<sup>13</sup>C NMR** (100 MHz, DMSO-*d*<sub>6</sub>) δ 137.6, 135.0, 135.7, 134.7, 134.1, 130.1, 129.7, 129.1, 126.6, 123.2, 121.7, 121.4, 115.3, 51.9.

**HRMS** (ESI) *m/z* calcd for C<sub>18</sub>H<sub>17</sub>N<sub>2</sub><sup>+</sup> [M-Cl]<sup>+</sup>: 261.1386, found: 261.1386.

1-benzyl-3-(4-vinylbenzyl)-1H-imidazol-3-ium chloride (**13b**)<sup>[3]</sup>

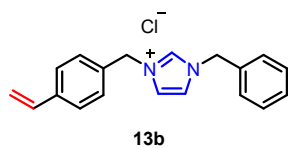

2.9 g, 93% yield

**Physical State:** pale yellow viscous liquid

**<sup>1</sup>H NMR** (400 MHz, DMSO-*d*<sub>6</sub>) δ 9.59 (s, 1H), 7.87 (s, 2H), 7.52 (d, *J* = 8.0 Hz, 2H), 7.43 (m, 7H), 6.74 (dd, *J* = 11.2, 6.8 Hz, 1H), 5.87 (d, *J* = 18.0 Hz, 1H), 5.45 (d, *J* = 5.2 Hz, 4H), 5.30 (d, *J* = 11.2 Hz, 1H).

**<sup>13</sup>C NMR** (100 MHz, DMSO-*d*<sub>6</sub>) δ 137.6, 136.4, 135.0, 134.0, 134.4, 129.1, 128.9, 128.8, 128.4, 126.7, 122.9, 115.4, 51.0, 51.7.

**HRMS** (ESI) *m/z* calcd for C<sub>19</sub>H<sub>19</sub>N<sub>2</sub><sup>+</sup> [M-Cl]<sup>+</sup>: 275.1543, found: 275.1543.

1,3-bis(4-vinylbenzyl)-1H-imidazol-3-ium chloride (**13c**)

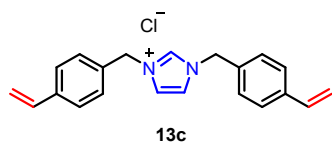

3.0 g, 90% yield

**Physical State:** yellow viscous liquid

**<sup>1</sup>H NMR** (400 MHz, CD<sub>3</sub>OD) δ 7.64 (s, 2H), 7.50 (d, *J* = 8.4 Hz, 4H), 7.39 (d, *J* = 8.4 Hz, 4H), 6.75 (dd, *J* = 17.6, 10.8 Hz, 2H), 5.83 (dd, *J* = 18.4, 0.8 Hz, 2H), 5.41 (s, 4H), 5.29 (dd, *J* = 10.8, 0.8 Hz, 2H).

**<sup>13</sup>C NMR** (100 MHz, CD<sub>3</sub>OD) δ 140.1, 137.2, 134.5, 129.0, 128.1, 124.0, 115.5.

**HRMS** (ESI) *m/z* calcd for C<sub>21</sub>H<sub>21</sub>N<sub>2</sub><sup>+</sup> [M-Cl]<sup>+</sup>: 301.1699, found: 301.1699.

## 5. Synthesis of NHC-Pds

### 5.1 Experimental procedures<sup>[4]</sup>



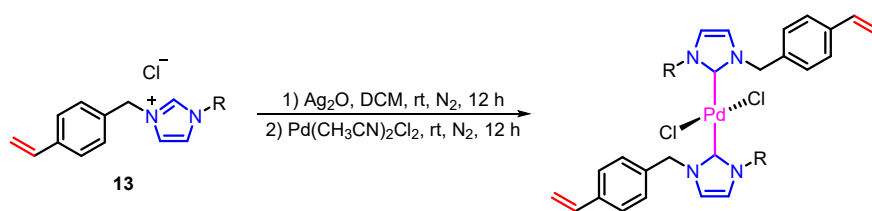

### Step 1: synthesis of NHC-Ags

To a 250 mL round bottom flask,  $\text{Ag}_2\text{O}$  (5.5 mmol, 0.55 equiv.) was added. The flask was evacuated and backfilled with  $\text{N}_2$  (3 cycles), then a solution of NHCs **13** (10.0 mmol, 1.0 equiv.) in 100 mL dry dichloromethane were added. The mixture was stirred at room temperature for 12 h for transmetalation.

### Step 2: synthesis of NHC-Pds

Under  $\text{N}_2$  atmosphere,  $\text{Pd}(\text{CH}_3\text{CN})_2\text{Cl}_2$  (5.0 mmol, 0.5 equiv.) was added to the flask containing NHC-Ags solution obtained in the previous step. The mixture was stirred at room temperature for 12 h. Then the reaction mixture was filtered, and the filtrate is decolorized by activated carbon. The filtrate was removed in vacuum to afford the crude product of NHC-Pds, which was washed with methanol (3 cycles) to afford NHC-Pds.

## 5.2 Characterization data of NHC-Pds

bis(1-phenyl-3-(4-vinylbenzyl)-2,3-dihydro-1H-imidazol-2-yl)palladium(IV) chloride (**1**)

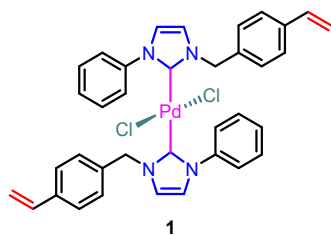

2.8 g, 80% yield

**Physical State:** golden yellow solid

**$^1\text{H}$  NMR** (400 MHz,  $\text{CDCl}_3$ )  $\delta$  8.05 – 8.01 (m, 4H), 7.50 (d,  $J = 8.4$  Hz, 4H), 7.46 (d,  $J = 8.3$  Hz, 4H), 7.21 – 7.16 (m, 6H), 7.09 (d,  $J = 2.0$  Hz, 2H), 6.79 – 6.72 (m, 4H), 5.80 (dd,  $J = 17.6, 1.2$  Hz, 2H), 5.61 (s, 4H), 5.29 (dd,  $J = 10.8, 0.8$  Hz, 2H).

**$^{13}\text{C}$  NMR** (100 MHz,  $\text{CDCl}_3$ )  $\delta$  170.4, 140.1, 137.7, 136.5, 135.7, 129.1, 129.0, 128.2, 126.9, 125.52, 122.3, 120.8, 114.5, 54.3.

**HRMS** (ESI)  $m/z$  calcd for  $\text{C}_{36}\text{H}_{32}\text{ClN}_4\text{Pd}^+ [\text{M}-\text{Cl}]^+$ : 661.1345, found: 661.1339.

bis(1-benzyl-3-(4-vinylbenzyl)-2,3-dihydro-1H-imidazol-2-yl)palladium(IV) chloride (**2**)

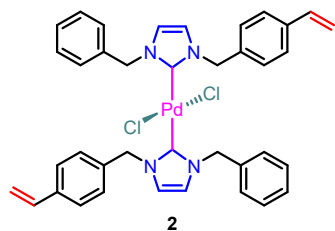

2.3 g, 65% yield

**Physical State:** Pale yellowish white solid

**<sup>1</sup>H NMR** (400 MHz, CDCl<sub>3</sub>) δ 7.47 – 7.36 (m, 8H), 7.35 – 7.26 (m, 10H), 6.70 – 6.61 (m, 6H), 5.73 – 5.65 (m, 10H), 5.22 (d, *J* = 10.8 Hz, 2H).

**<sup>13</sup>C NMR** (100 MHz, CDCl<sub>3</sub>) δ 170.3, 137.4, 136.5, 136.3, 135.9, 128.9, 128.8, 128.8, 128.7, 128.68, 128.2, 128.2, 126.7, 121.1, 121.0, 114.3, 114.2, 54.4, 54.4, 54.1, 54.1.

**HRMS** (ESI) *m/z* calcd for C<sub>38</sub>H<sub>36</sub>ClN<sub>4</sub>Pd<sup>+</sup> [M-Cl]<sup>+</sup>: 689.1658, found: 689.1661.

bis(1,3-bis(4-vinylbenzyl)-2,3-dihydro-1H-imidazol-2-yl)palladium(IV) chloride (**3**)

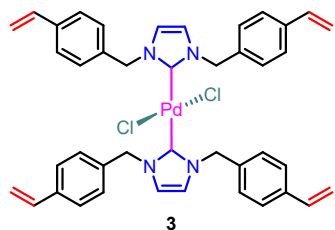

2.3 g, 60% yield

**Physical State:** golden yellow solid

**<sup>1</sup>H NMR** (400 MHz, CDCl<sub>3</sub>) δ 7.38 (d, *J* = 8.0 Hz, 8H), 7.32 (d, *J* = 8.0 Hz, 8H), 6.72 – 6.58 (m, 8H), 5.70 (d, *J* = 19.6 Hz, 12H), 5.22 (d, *J* = 10.8 Hz, 4H).

**<sup>13</sup>C NMR** (100 MHz, CDCl<sub>3</sub>) δ 170.3, 137.4, 136.4, 135.9, 128.8, 126.7, 121.1, 114.2, 54.1.

**HRMS** (ESI) *m/z* calcd for C<sub>42</sub>H<sub>40</sub>ClN<sub>4</sub>Pd<sup>+</sup> [M-Cl]<sup>+</sup>: 741.1971, found: 741.1669.

## 6. Synthesis of Poly NHC-Pd Catalysts

### 6.1 Experimental procedures

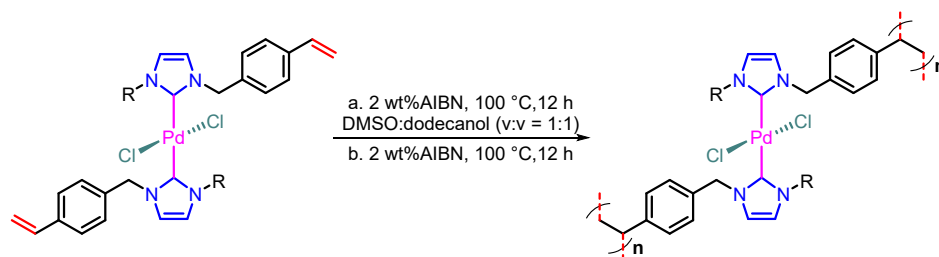

To a 50 mL reaction tube, NHC-Pd (1.0 g) and AIBN (20 mg, 2 wt%) in 10 mL dimethyl sulfoxide and 10 mL 1-Dodecanol were added. The mixture was stirred at 100 °C for 12 h. [5] Afterward, AIBN (20 mg, 2 wt%) was added before being heated at 100 °C for a further 12 h. Then 200 ml of methanol was added to the reaction solution to precipitate the polymers. The mixture was filtered and the solid was washed with methanol (3 cycles) to afford poly NHC-Pd catalysts.

## 7. C-H acetoxylation of 2-Phenylpyridine compounds

### 7.1 Experimental procedures in batch

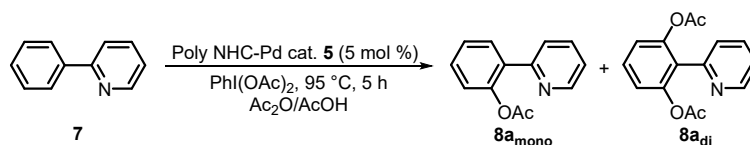

To a 10 mL reaction tube, **7** (0.6 mmol, 1 equiv.), diacetoxyiodo benzene (0.9 mmol, 1.5 equiv.) and poly NHC-Pd catalyst **5** (0.03 mmol, 5 mol%) in acetic acid (3 mL) and acetic anhydride (3 mL) were added. The reaction mixture was heated to 95 °C for 5 h. Then the reaction mixture was removed in vacuum to afford the crude product, which was purified by short silica column flash chromatography (PE / EtOAc = 2:1) to give the product **8<sub>mono</sub>** and **8<sub>di</sub>**. [6]

### 7.2 Experimental procedure in flow

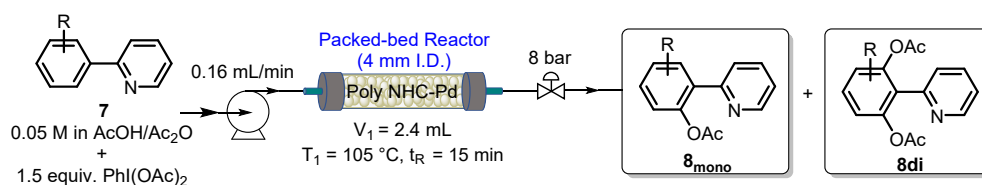

One flow stream was delivered into the flow reactor by the plunger pump (AP0010, SANOTAC). The stream contained a solution of **7** (1.0 mmol, 1.0 equiv.) and diacetoxyiodo benzene (1.5 mmol,

1.5 equiv.) in acetic acid (10 mL) and acetic anhydride (10 mL). This stream was pumped through the packed-bed reactor (2.4 mL internal volume,  $t_R = 15$  min, 300 mg poly NHC-Pd catalyst **5** and 1.5 g 60-80 mesh silica gel powder were packed in it) at 105 °C at a flow rate of 0.16 mL/min. A 8.0 bar back-pressure regulator (BPR) was connected at the outlet of packed-bed reactor. The output from the packed-bed reactor was collected for 63 minutes (10 mL), then the reaction mixture was removed in vacuum to afford the crude product, which was purified by short silica column flash chromatography (PE / EtOAc = 2:1) to give the product **8<sub>mono</sub>** and **8<sub>di</sub>**.

### 7.3 Characterization data of product **8<sub>mono</sub>** and **8<sub>di</sub>**

2-(pyridin-2-yl)phenyl acetate (**8<sub>mono</sub>**)<sup>[7]</sup>

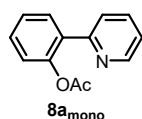

33.0 mg, 31% yield

**Physical State:** light red oil

**<sup>1</sup>H NMR** (400 MHz, CDCl<sub>3</sub>) δ 8.63 (ddd,  $J = 4.8, 2.0, 0.8$  Hz, 1H), 7.67 (td,  $J = 7.6, 1.6$  Hz, 1H), 7.63 (dd,  $J = 7.6, 1.6$  Hz, 1H), 7.47 (dt,  $J = 8.0, 1.2$  Hz, 1H), 7.36 (td,  $J = 7.6, 1.6$  Hz, 1H), 7.29 (td,  $J = 7.6, 1.6$  Hz, 1H), 7.19 – 7.15 (m, 1H), 7.10 (dd,  $J = 8.0, 1.2$  Hz, 1H), 2.11 (s, 3H).

**<sup>13</sup>C NMR** (100 MHz, CDCl<sub>3</sub>) δ 169.6, 155.8, 149.6, 148.2, 136.6, 133.1, 130.9, 129.9, 126.6, 123.8, 123.3, 122.4, 21.1.

**HRMS** (ESI)  $m/z$  calcd for C<sub>13</sub>H<sub>12</sub>NO<sub>2</sub><sup>+</sup> [M+H]<sup>+</sup>: 214.0863, found: 214.0863.

2-(pyridin-2-yl)-1,3-phenylene diacetate (**8<sub>di</sub>**)<sup>[8]</sup>

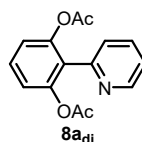

63.7 mg, 47% yield

**Physical State:** light yellow oil

**<sup>1</sup>H NMR** (400 MHz, CDCl<sub>3</sub>) δ 8.62 (ddd,  $J = 4.8, 1.6, 0.8$  Hz, 1H), 7.66 (td,  $J = 7.6, 2.0$  Hz, 1H), 7.36 (t,  $J = 8.0$  Hz, 1H), 7.25 (dt,  $J = 8.0, 1.2$  Hz, 1H), 7.21 – 7.17 (m, 1H), 7.03 (d,  $J = 8.0$  Hz, 2H), 1.95 (s, 6H).

$^{13}\text{C}$  NMR (100 MHz,  $\text{CDCl}_3$ )  $\delta$  167.98, 151.16, 148.38, 148.03, 135.06, 128.41, 126.40, 124.11, 121.55, 119.67, 19.59.

HRMS (ESI)  $m/z$  calcd for  $\text{C}_{15}\text{H}_{14}\text{NO}_4^+$   $[\text{M}+\text{H}]^+$ : 272.0917, found: 272.0917.

5-methyl-2-(pyridin-2-yl)phenyl acetate (**8b<sub>mono</sub>**)<sup>[7]</sup>

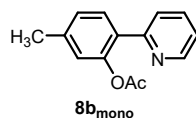

42.0 mg, 37% yield

**Physical State:** light orange oil

$^1\text{H}$  NMR (400 MHz,  $\text{CDCl}_3$ )  $\delta$  8.59 (ddd,  $J = 4.8, 2.0, 0.8$  Hz, 1H), 7.63 (td,  $J = 7.6, 2.0$  Hz, 1H), 7.52 (d,  $J = 8.0$  Hz, 1H), 7.43 (dt,  $J = 8.0, 1.2$  Hz, 1H), 7.15 – 7.11 (m, 1H), 7.08 (ddd,  $J = 8.0, 1.6, 0.8$  Hz, 1H), 6.90 (d,  $J = 0.8$  Hz, 1H), 2.32 (s, 3H), 2.09 (s, 3H).

$^{13}\text{C}$  NMR (100 MHz,  $\text{CDCl}_3$ )  $\delta$  168.6, 154.8, 148.5, 146.9, 139.2, 135.2, 129.5, 129.2, 126.2, 122.7, 122.4, 120.9, 20.1, 20.0.

HRMS (ESI)  $m/z$  calcd for  $\text{C}_{14}\text{H}_{14}\text{NO}_2^+$   $[\text{M}+\text{H}]^+$ : 228.1019, found: 228.1019.

5-methyl-2-(pyridin-2-yl)-1,3-phenylene diacetate (**8b<sub>di</sub>**)<sup>[9]</sup>

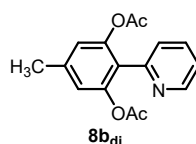

68.4 mg, 48% yield

**Physical State:** orange solid

$^1\text{H}$  NMR (400 MHz,  $\text{CDCl}_3$ )  $\delta$  8.59 (ddd,  $J = 4.8, 2.0, 0.8$  Hz, 1H), 7.61 (td,  $J = 7.6, 1.6$  Hz, 1H), 7.22 (dt,  $J = 8.0, 1.2$  Hz, 1H), 7.15 (ddd,  $J = 7.6, 4.8, 1.2$  Hz, 1H), 6.85 – 6.80 (m, 2H), 2.31 (s, 3H), 1.93 (s, 6H).

$^{13}\text{C}$  NMR (100 MHz,  $\text{CDCl}_3$ )  $\delta$  169.0, 152.4, 149.4, 148.8, 140.1, 135.9, 125.1, 124.7, 122.4, 121.3, 21.3, 20.6.

HRMS (ESI)  $m/z$  calcd for  $\text{C}_{16}\text{H}_{16}\text{NO}_4^+$   $[\text{M}+\text{H}]^+$ : 286.1074, found: 286.1074.

4-methyl-2-(pyridin-2-yl)phenyl acetate (**8c<sub>mono</sub>**)<sup>[7]</sup>

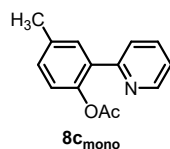

57.9 mg, 51% yield

**Physical State:** light yellow oil

**<sup>1</sup>H NMR** (400 MHz, CDCl<sub>3</sub>) δ 8.63 (ddd, *J* = 4.8, 2.0, 0.8 Hz, 1H), 7.66 (td, *J* = 7.6, 2.0 Hz, 1H), 7.24 – 7.20 (m, 2H), 7.19 – 7.16 (m, 1H), 6.98 (d, *J* = 8.0 Hz, 1H), 2.34 (s, 3H), 2.10 (s, 3H).

**<sup>13</sup>C NMR** (100 MHz, CDCl<sub>3</sub>) δ 169.8, 155.9, 149.6, 145.9, 136.5, 136.3, 132.7, 131.4, 130.5, 123.8, 123.0, 122.3, 21.1, 21.6.

**HRMS** (ESI) *m/z* calcd for C<sub>14</sub>H<sub>14</sub>NO<sub>2</sub><sup>+</sup> [M+H]<sup>+</sup>: 228.1019, found: 228.1019.

4-methyl-2-(pyridin-2-yl)-1,3-phenylene diacetate (**8c<sub>di</sub>**)

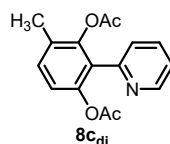

25.6 mg, 18% yield

**Physical State:** bright yellow solid

**<sup>1</sup>H NMR** (400 MHz, CDCl<sub>3</sub>) δ 8.62 (ddd, *J* = 4.8, 2.0, 0.8 Hz, 1H), 7.64 (td, *J* = 7.6, 2.0 Hz, 1H), 7.24 – 7.20 (m, 2H), 7.19 – 7.16 (m, 1H), 6.94 (d, *J* = 8.4 Hz, 1H), 2.13 (s, 3H), 1.93 (d, *J* = 2.8 Hz, 6H).

**<sup>13</sup>C NMR** (100 MHz, CDCl<sub>3</sub>) δ 169.2, 168.5, 152.8, 149.5, 147.6, 147.0, 136.0, 130.98, 129.1, 127.6, 125.1, 122.5, 120.5, 20.7, 20.3, 16.3.

**HRMS** (ESI) *m/z* calcd for C<sub>16</sub>H<sub>16</sub>NO<sub>4</sub><sup>+</sup> [M+H]<sup>+</sup>: 286.1074, found: 286.1074.

3-methyl-2-(pyridin-2-yl)phenyl acetate (**8d<sub>mono</sub>**)<sup>[7]</sup>

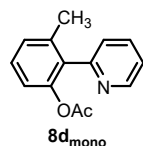

86.3 mg, 76% yield

**Physical State:** orange oil

**<sup>1</sup>H NMR** (400 MHz, CDCl<sub>3</sub>) δ 8.61 (ddd, *J* = 4.8, 1.6, 0.8 Hz, 1H), 7.63 (td, *J* = 7.6, 1.6 Hz, 1H), 7.21 (t, *J* = 8.0 Hz, 1H), 7.18 – 7.13 (m, 2H), 7.08 (d, *J* = 7.6 Hz, 1H), 6.90 (d, *J* = 8.0 Hz, 1H), 2.07 (s, 3H), 1.84 (s, 3H).

**<sup>13</sup>C NMR** (100 MHz, CDCl<sub>3</sub>) δ 169.3, 155.7, 149.4, 148.3, 138.0, 135.9, 133.5, 128.7, 127.9, 124.6, 122.0, 119.9, 20.40, 19.8.

**HRMS** (ESI) *m/z* calcd for C<sub>14</sub>H<sub>14</sub>NO<sub>2</sub><sup>+</sup> [M+H]<sup>+</sup>: 228.1019, found: 228.1019.

5-methoxy-2-(pyridin-2-yl)phenyl acetate (**8e<sub>mono</sub>**)<sup>[7]</sup>

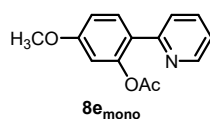

54.7 mg, 45% yield

**Physical State:** orange oil

**<sup>1</sup>H NMR** (400 MHz, CDCl<sub>3</sub>) δ 8.58 (ddd, *J* = 4.8, 2.0, 0.8 Hz, 1H), 7.62 (td, *J* = 7.6, 2.0 Hz, 1H), 7.58 (d, *J* = 8.8 Hz, 1H), 7.42 (dt, *J* = 8.0, 1.2 Hz, 1H), 7.11 (ddd, *J* = 7.6, 4.8, 1.2 Hz, 1H), 6.82 (dd, *J* = 8.8, 2.4 Hz, 1H), 6.63 (d, *J* = 2.4 Hz, 1H), 3.75 (s, 3H), 2.11 (s, 3H).

**<sup>13</sup>C NMR** (100 MHz, CDCl<sub>3</sub>) δ 169.4, 160.8, 155.7, 149.4, 149.1, 136.4, 131.5, 125.6, 123.3, 121.8, 112.4, 108.8, 55.6, 21.1.

**HRMS** (ESI) *m/z* calcd for C<sub>14</sub>H<sub>14</sub>NO<sub>3</sub><sup>+</sup> [M+H]<sup>+</sup>: 244.0968, found: 244.0968.

5-methoxy-2-(pyridin-2-yl)-1,3-phenylene diacetate (**8e<sub>di</sub>**)<sup>[9]</sup>

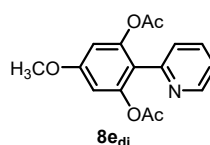

24.1 mg, 16% yield

**Physical State:** orange solid

**<sup>1</sup>H NMR** (400 MHz, CDCl<sub>3</sub>) δ 8.67 (ddd, *J* = 4.8, 2.0, 0.8 Hz, 1H), 7.70 (td, *J* = 7.6, 2.0 Hz, 1H), 7.30 (dt, *J* = 8.0, 1.2 Hz, 1H), 7.23 (ddd, *J* = 7.6, 4.8, 1.2 Hz, 1H), 6.66 (s, 2H), 3.82 (s, 3H), 2.02 (s, 6H).

**<sup>13</sup>C NMR** (100 MHz, CDCl<sub>3</sub>) δ 168.8, 160.2, 152.4, 149.8, 149.4, 136.0, 125.3, 122.3, 120.2, 106.9, 55.7, 20.7.

**HRMS** (ESI) *m/z* calcd for C<sub>16</sub>H<sub>16</sub>NO<sub>5</sub><sup>+</sup> [M+H]<sup>+</sup>: 302.1023, found: 302.1023.

4-chloro-2-(pyridin-2-yl)phenyl acetate (**8f<sub>mono</sub>**)

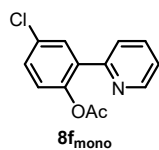

66.7 mg, 54% yield

**Physical State:** brown oil

**<sup>1</sup>H NMR** (400 MHz, CDCl<sub>3</sub>) δ 8.64 (ddd, *J* = 4.8, 2.0, 1.2 Hz, 1H), 7.71 – 7.67 (m, 1H), 7.65 (d, *J* = 2.6 Hz, 1H), 7.47 (dt, *J* = 8.0, 1.2 Hz, 1H), 7.32 (dd, *J* = 8.4, 2.4 Hz, 1H), 7.24 – 7.20 (m, 1H), 7.04 (d, *J* = 8.4 Hz, 1H), 2.11 (s, 3H).

**<sup>13</sup>C NMR** (100 MHz, CDCl<sub>3</sub>) δ 169.2, 154.6, 149.8, 146.7, 136.7, 134.6, 131.9, 130.8, 129.8, 124.8, 123.8, 122.9, 21.1.

**HRMS** (ESI) *m/z* calcd for C<sub>13</sub>H<sub>10</sub>ClNO<sub>2</sub><sup>+</sup> [M+H]<sup>+</sup>: 248.0473, found: 248.0473.

4-chloro-2-(pyridin-2-yl)-1,3-phenylene diacetate (**8f<sub>di</sub>**)

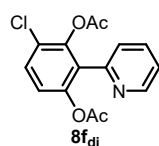

10.7 mg, 7% yield

**Physical State:** brown solid

**<sup>1</sup>H NMR** (400 MHz, CDCl<sub>3</sub>) δ 8.70 (ddd, *J* = 4.8, 2.0, 1.2 Hz, 1H), 7.74 (td, *J* = 7.6, 2.0 Hz, 1H), 7.50 (d, *J* = 8.8 Hz, 1H), 7.32 – 7.27 (m, 2H), 7.08 (d, *J* = 8.8 Hz, 1H), 2.08 (s, 3H), 2.01 (s, 3H).

**<sup>13</sup>C NMR** (100 MHz, CDCl<sub>3</sub>) δ 168.9, 167.9, 151.8, 149.7, 147.6, 145.8, 136.3, 130.0, 129.7, 125.6, 125.0, 123.0, 121.8, 20.7, 20.3.

**HRMS** (ESI) *m/z* calcd for C<sub>15</sub>H<sub>12</sub>ClNO<sub>4</sub><sup>+</sup> [M+H]<sup>+</sup>: 306.0528, found: 306.0528.

5-chloro-2-(pyridin-2-yl)phenol (**8g<sub>mono</sub>**)<sup>[9]</sup>

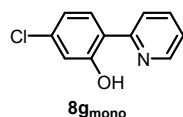

32.8 mg, 32% yield

**Physical State:** white solid



**<sup>1</sup>H NMR** (400 MHz, CDCl<sub>3</sub>) δ 14.43 (s, 1H), 8.36 (dt, *J* = 5.2, 1.6 Hz, 1H), 7.72 – 7.70 (m, 2H), 7.56 (d, *J* = 8.4 Hz, 1H), 7.15 – 7.12 (m, 1H), 6.92 (d, *J* = 2.4 Hz, 1H), 6.75 (dd, *J* = 8.8, 2.4 Hz, 1H).

**<sup>13</sup>C NMR** (100 MHz, CDCl<sub>3</sub>) δ 160.9, 157.0, 145.8, 138.1, 136.7, 127.1, 121.9, 119.1, 119.1, 118.6, 117.4.

**HRMS** (ESI) *m/z* calcd for C<sub>11</sub>H<sub>9</sub>ClNO<sup>+</sup> [M+H]<sup>+</sup>: 206.0367, found: 206.0367.

5-chloro-2-(pyridin-2-yl)-1,3-phenylene diacetate (**8g<sub>di</sub>**)<sup>[9]</sup>

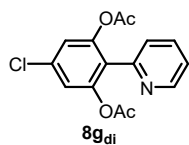

16.8 mg, 11% yield

**Physical State:** red solid.

**<sup>1</sup>H NMR** (400 MHz, CDCl<sub>3</sub>) δ 8.69 (ddd, *J* = 4.8, 2.0, 0.8 Hz, 1H), 7.73 (td, *J* = 8.0, 1.6 Hz, 1H), 7.31 – 7.26 (m, 2H), 7.13 (s, 2H), 2.02 (s, 6H).

**<sup>13</sup>C NMR** (100 MHz, CDCl<sub>3</sub>) δ 168.6, 151.6, 149.7, 149.5, 136.2, 134.5, 126.5, 125.2, 122.9, 121.5, 20.7.

**HRMS** (ESI) *m/z* calcd for C<sub>15</sub>H<sub>13</sub>ClNO<sub>4</sub><sup>+</sup> [M+H]<sup>+</sup>: 306.0528, found: 306.0528.

3-chloro-2-(pyridin-2-yl)phenyl acetate (**8h<sub>mono</sub>**)<sup>[10]</sup>

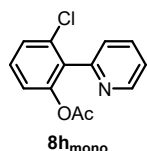

107.4 mg, 87% yield

**Physical State:** light yellow oil

**<sup>1</sup>H NMR** (400 MHz, CDCl<sub>3</sub>) δ 8.64 (ddd, *J* = 4.8, 2.0, 0.8 Hz, 1H), 7.69 (td, *J* = 8.0, 1.6 Hz, 1H), 7.32 (dd, *J* = 8.0, 1.6 Hz, 1H), 7.31 – 7.26 (m, 2H), 7.22 (ddd, *J* = 7.6, 4.8, 1.2 Hz, 1H), 7.03 (dd, *J* = 8.0, 1.6 Hz, 1H), 1.88 (s, 3H).

**<sup>13</sup>C NMR** (100 MHz, CDCl<sub>3</sub>) δ 169.0, 153.6, 149.4, 149.4, 136.1, 133.9, 133.2, 129.7, 127.4, 125.4, 122.8, 121.6, 20.4.

**HRMS** (ESI) *m/z* calcd for C<sub>13</sub>H<sub>11</sub>ClNO<sub>2</sub><sup>+</sup> [M+H]<sup>+</sup>: 248.0473, found: 248.0473.

5-fluoro-2-(pyridin-2-yl)phenyl acetate (**8i<sub>mono</sub>**)<sup>[9]</sup>

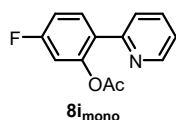

61.2 mg, 53% yield

**Physical State:** light orange oil

**<sup>1</sup>H NMR** (400 MHz, CDCl<sub>3</sub>) δ 8.59 (ddd, *J* = 4.8, 2.0, 0.8 Hz, 1H), 7.66 – 7.63 (m, 1H), 7.62 – 7.59 (m, 1H), 7.42 (dt, *J* = 8.0, 1.2 Hz, 1H), 7.15 (ddd, *J* = 7.6, 4.8, 1.2 Hz, 1H), 6.98 (td, *J* = 8.4, 2.8 Hz, 1H), 6.85 (dd, *J* = 9.2, 2.8 Hz, 1H), 2.09 (s, 3H).

**<sup>13</sup>C NMR** (100 MHz, CDCl<sub>3</sub>) δ 167.9, 161.7 (d, *J* = 250.1 Hz), 153.9, 148.6, 147.8 (d, *J* = 11.0 Hz), 135.4, 130.9 (d, *J* = 9.2 Hz), 128.4 (d, *J* = 3.7 Hz), 122.4, 121.2, 112.5 (d, *J* = 21.0 Hz), 110.0 (d, *J* = 24.2 Hz), 19.9.

**HRMS** (ESI) *m/z* calcd for C<sub>13</sub>H<sub>11</sub>FN<sub>2</sub>O<sub>2</sub><sup>+</sup> [M+H]<sup>+</sup>: 232.0768, found: 233.0768.

5-fluoro-2-(pyridin-2-yl)-1,3-phenylene diacetate (**8i<sub>di</sub>**)<sup>[9]</sup>

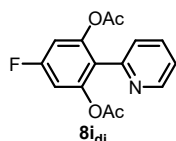

30.3 mg, 21% yield

**Physical State:** orange solid

**<sup>1</sup>H NMR** (400 MHz, CDCl<sub>3</sub>) δ 8.62 (ddd, *J* = 4.9, 2.0, 0.8 Hz, 1H), 7.66 (td, *J* = 7.6, 1.6 Hz, 1H), 7.23 – 7.19 (m, 2H), 6.82 (d, *J* = 8.8 Hz, 2H), 1.96 (s, 6H).

**<sup>13</sup>C NMR** (100 MHz, CDCl<sub>3</sub>) δ 167.4, 161.0 (d, *J* = 249.9 Hz), 150.5, 148.7 (d, *J* = 12.9 Hz), 148.4, 135.3, 124.3, 122.7 (d, *J* = 4.5 Hz), 121.7, 107.8 (d, *J* = 24.3 Hz), 19.5.

**HRMS** (ESI) *m/z* calcd for C<sub>15</sub>H<sub>13</sub>FN<sub>2</sub>O<sub>4</sub><sup>+</sup> [M+H]<sup>+</sup>: 290.0823, found: 290.0823.

2-(pyridin-2-yl)-5-(trifluoromethyl)phenyl acetate (**8j<sub>mono</sub>**)<sup>[9]</sup>

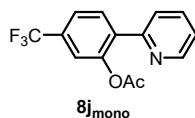

59.0 mg, 42% yield

**Physical State:** light yellow solid

**<sup>1</sup>H NMR** (400 MHz, CDCl<sub>3</sub>) δ 8.65 (ddd, *J* = 4.8, 2.0, 0.8 Hz, 1H), 7.77 (d, *J* = 8.4 Hz, 1H), 7.71 (td, *J* = 7.6, 2.0 Hz, 1H), 7.54 (ddd, *J* = 8.0, 1.6, 0.8 Hz, 1H), 7.50 (dt, *J* = 8.0, 1.2 Hz, 1H), 7.40 – 7.37 (m, 1H), 7.24 (ddd, *J* = 7.2, 2.4, 1.2 Hz, 1H), 2.13 (s, 3H).

**<sup>13</sup>C NMR** (100 MHz, CDCl<sub>3</sub>) δ 167.9, 153.4, 148.7, 147.1, 135.6, 135.4, 130.80 (q, *J* = 33.2 Hz), 130.5, 123.8, 122.7, 122.12 (q, *J* = 3.7 Hz), 121.9, 121.1, 119.7 (q, *J* = 3.9 Hz), 19.8.

**HRMS** (ESI) *m/z* calcd for C<sub>14</sub>H<sub>11</sub>F<sub>3</sub>NO<sub>2</sub><sup>+</sup> [M+H]<sup>+</sup>: 282.0736, found: 282.0736.

2-(pyridin-2-yl)-5-(trifluoromethyl)-1,3-phenylene diacetate (**8j<sub>di</sub>**)<sup>[9]</sup>

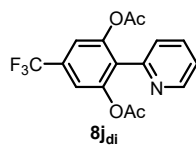

40.7 mg, 24% yield

**Physical State:** light yellow solid.

**<sup>1</sup>H NMR** (400 MHz, CDCl<sub>3</sub>) δ 8.72 (d, *J* = 4.4 Hz, 1H), 7.76 (td, *J* = 7.6, 1.6 Hz, 1H), 7.38 (d, *J* = 0.8 Hz, 2H), 7.34 – 7.29 (m, 2H), 2.04 (s, 6H).

**<sup>13</sup>C NMR** (100 MHz, CDCl<sub>3</sub>) δ 168.6, 151.2, 149.8, 149.6, 136.4, 131.73 (q, *J* = 34.1 Hz), 125.2, 123.2, 118.1 (q, *J* = 3.7 Hz), 20.6.

**HRMS** (ESI) *m/z* calcd for C<sub>16</sub>H<sub>13</sub>F<sub>3</sub>NO<sub>4</sub><sup>+</sup> [M+H]<sup>+</sup>: 340.0791, found: 340.0791.

4,5-dimethyl-2-(pyridin-2-yl)phenyl acetate (**8k<sub>mono</sub>**)

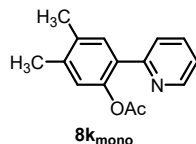

80.7 mg, 67% yield

**Physical State:** orange oil

**<sup>1</sup>H NMR** (400 MHz, CDCl<sub>3</sub>) δ 8.57 (ddd, *J* = 4.8, 2.0, 1.2 Hz, 1H), 7.58 (td, *J* = 7.6, 2.0 Hz, 1H), 7.42 (dt, *J* = 8.0, 1.2 Hz, 1H), 7.40 (s, 1H), 7.09 (ddd, *J* = 7.6, 4.8, 1.2 Hz, 1H), 6.83 (s, 1H), 2.19 (s, 6H), 2.07 (s, 3H).

**<sup>13</sup>C NMR** (100 MHz, CDCl<sub>3</sub>) δ 168.7, 154.8, 148.5, 144.8, 137.6, 135.1, 133.8, 130.5, 129.1, 123.0, 122.4, 120.8, 19.9, 18.6, 18.2.

**HRMS** (ESI) *m/z* calcd for C<sub>15</sub>H<sub>15</sub>NO<sub>2</sub><sup>+</sup> [M+H]<sup>+</sup>: 242.1176, found: 242.1176.

4,5-dimethyl-2-(pyridin-2-yl)-1,3-phenylene diacetate (**8k<sub>di</sub>**)

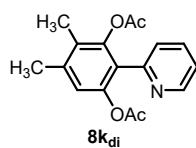

19.4 mg, 13% yield

**Physical State:** orange solid

**<sup>1</sup>H NMR** (400 MHz, CDCl<sub>3</sub>) δ 8.60 (ddd, *J* = 4.8, 1.6, 0.8 Hz, 1H), 7.62 (td, *J* = 7.6, 2.0 Hz, 1H), 7.21 (dt, *J* = 7.6, 1.2 Hz, 1H), 7.16 (ddd, *J* = 7.2, 2.4, 1.2 Hz, 1H), 6.85 (s, 1H), 2.27 (s, 3H), 2.01 (s, 3H), 1.92 (d, *J* = 2.0 Hz, 6H).

**<sup>13</sup>C NMR** (100 MHz, CDCl<sub>3</sub>) δ 168.3, 167.6, 151.9, 148.3, 146.3, 145.1, 138.0, 134.9, 126.6, 124.1, 121.3, 120.7, 19.6, 19.3, 11.6.

**HRMS** (ESI) *m/z* calcd for C<sub>17</sub>H<sub>17</sub>NO<sub>4</sub><sup>+</sup> [M+H]<sup>+</sup>: 300.1230, found: 300.1230.

3-(pyridin-2-yl)naphthalen-2-yl acetate (**8l<sub>mono</sub>**)<sup>[11]</sup>

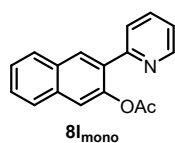

59.2 mg, 45% yield

**Physical State:** orange oil

**<sup>1</sup>H NMR** (400 MHz, CDCl<sub>3</sub>) δ 8.62 (ddd, *J* = 4.8, 2.0, 1.2 Hz, 1H), 8.06 (s, 1H), 7.79 (d, *J* = 7.6 Hz, 1H), 7.70 (d, *J* = 7.2 Hz, 1H), 7.62 (td, *J* = 7.6, 2.0 Hz, 1H), 7.54 – 7.50 (m, 2H), 7.41 – 7.34 (m, 2H), 7.15 – 7.11 (m, 1H), 2.09 (s, 3H).

**<sup>13</sup>C NMR** (100 MHz, CDCl<sub>3</sub>) δ 168.6, 154.9, 148.5, 144.9, 135.3, 132.6, 131.4, 130.6, 129.6, 127.2, 126.2, 126.0, 125.1, 122.7, 121.2, 119.5, 19.9.

**HRMS** (ESI) *m/z* calcd for C<sub>17</sub>H<sub>13</sub>NO<sub>2</sub><sup>+</sup> [M+H]<sup>+</sup>: 264.1019, found: 264.1019.

2-(pyridin-2-yl)naphthalene-1,3-diyl diacetate (**8l<sub>di</sub>**)

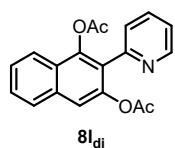

33.7 mg, 21% yield

**Physical State:** orange solid

**<sup>1</sup>H NMR** (400 MHz, CDCl<sub>3</sub>) δ 8.67 (ddd, *J* = 4.8, 1.6, 0.8 Hz, 1H), 7.81 – 7.74 (m, 2H), 7.69 (td, *J* = 7.6, 1.6 Hz, 1H), 7.54 (s, 1H), 7.50 – 7.42 (m, 2H), 7.35 (dt, *J* = 7.6, 1.2 Hz, 1H), 7.24 – 7.20 (m, 1H), 2.09 (s, 3H), 1.97 (s, 3H)

**<sup>13</sup>C NMR** (100 MHz, CDCl<sub>3</sub>) δ 169.3, 169.0, 152.9, 149.7, 146.0, 145.5, 136.1, 133.8, 127.9, 127.7, 126.8, 125.8, 125.7, 125.5, 122.7, 122.1, 118.6, 20.8, 20.6.

**HRMS** (ESI) *m/z* calcd for C<sub>19</sub>H<sub>15</sub>NO<sub>4</sub><sup>+</sup> [M+H]<sup>+</sup>: 322.1074, found: 322.1074.

5-formyl-2-(pyridin-2-yl)phenyl acetate (**8m<sub>mono</sub>**) [7]

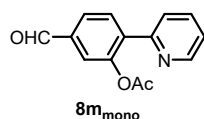

44.6 mg, 37% yield

**Physical State:** orange oil

**<sup>1</sup>H NMR** (400 MHz, CDCl<sub>3</sub>) δ 9.97 (s, 1H), 8.66 (ddd, *J* = 4.8, 2.0, 0.8 Hz, 1H), 7.83 (d, *J* = 8.0 Hz, 1H), 7.79 (dd, *J* = 8.0, 1.6 Hz, 1H), 7.71 (td, *J* = 7.6, 1.6 Hz, 1H), 7.62 (d, *J* = 1.6 Hz, 1H), 7.53 (dt, *J* = 8.0, 1.2 Hz, 1H), 7.26 – 7.22 (m, 1H), 2.14 (s, 3H).

**<sup>13</sup>C NMR** (100 MHz, CDCl<sub>3</sub>) δ 189.9, 168.1, 153.5, 148.8, 147.6, 137.7, 136.4, 135.5, 130.7, 126.4, 123.3, 122.8, 122.0, 19.9.

**HRMS** (ESI) *m/z* calcd for C<sub>14</sub>H<sub>12</sub>NO<sub>3</sub><sup>+</sup> [M+H]<sup>+</sup>: 242.0812, found: 242.0812.

5-formyl-2-(pyridin-2-yl)-1,3-phenylene diacetate (**8m<sub>di</sub>**)

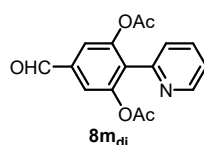

35.9 mg, 24% yield

**Physical State:** yellow solid

**<sup>1</sup>H NMR** (400 MHz, CDCl<sub>3</sub>) δ 9.93 (s, 1H), 8.65 (ddd, *J* = 4.8, 2.0, 0.8 Hz, 1H), 7.70 (td, *J* = 7.6, 1.6 Hz, 1H), 7.56 (s, 2H), 7.29 – 7.26 (m, 1H), 7.26 – 7.23 (m, 1H), 1.98 (s, 6H).

**<sup>13</sup>C NMR** (100 MHz, CDCl<sub>3</sub>) δ 189.9, 168.7, 151.3, 149.9, 149.8, 137.2, 136.3, 125.1, 123.2, 121.8, 20.6.

**HRMS** (ESI) *m/z* calcd for C<sub>16</sub>H<sub>14</sub>NO<sub>5</sub><sup>+</sup> [M+H]<sup>+</sup>: 300.0866, found: 300.0866.

## 8. C-H acetoxylation of arenes using different directing groups

### 8.1 Experimental procedures in batch

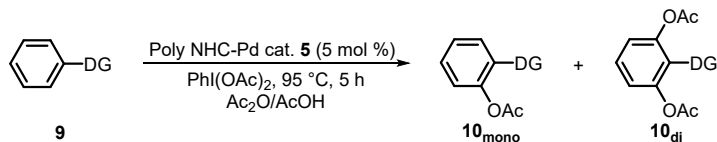

To a 10 mL reaction tube, **9** (0.6 mmol, 1.0 equiv.), diacetoxyiodo benzene (0.9 mmol, 1.5 equiv.) and poly NHC-Pd catalyst **5** (0.03 mmol, 5 mol%) in acetic acid (3 mL) and acetic anhydride (3 mL) were added. The reaction mixture was heated to 95 °C for 5 h. Then the reaction mixture was removed in vacuum to afford the crude product, which was purified by short silica column flash chromatography (PE / EtOAc = 2:1) to give the product **10<sub>mono</sub>** and **10<sub>di</sub>**.

### 8.2 Experimental procedures in flow

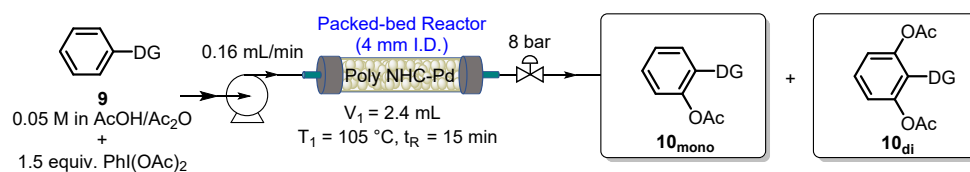

One flow stream was delivered into the flow reactor by the plunger pump (AP0010, SANOTAC). The stream contained a solution of **9** (1.0 mmol, 1.0 equiv.) and diacetoxyiodo benzene (1.5 mmol, 1.5 equiv.) in acetic acid (10 mL) and acetic anhydride (10 mL). This stream was pumped through packed-bed reactor (2.4 mL internal volume,  $t_R = 15$  min, 300 mg poly NHC-Pd catalyst **5** and 1.5 g 60-80 mesh silica gel powder were packed in it) at 105 °C at a flow rate of 0.16 mL/ min. A 8.0 bar back-pressure regulator (BPR) was connected at the outlet of packed-bed reactor. The output from the packed-bed reactor was collected for 63 minutes (10 mL), then the reaction mixture was removed in vacuum to afford the crude product, which was purified by short silica column flash chromatography (PE / EtOAc = 2:1) to give the product **10<sub>mono</sub>** and **10<sub>di</sub>**.

### 8.3 Characterization data of product **10<sub>mono</sub>** and **10<sub>di</sub>**

2-(5-methylpyridin-2-yl)phenyl acetate (**10a<sub>mono</sub>**)

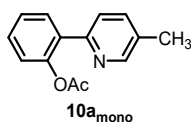

32.9 mg, 29% yield

**Physical State:** yellow oil

**<sup>1</sup>H NMR** (400 MHz, CDCl<sub>3</sub>) δ 8.52 (d, *J* = 2.0 Hz, 1H), 7.69 (dd, *J* = 7.6, 2.0 Hz, 1H), 7.54 (dd, *J* = 8.0, 2.1 Hz, 1H), 7.44 (d, *J* = 8.0 Hz, 1H), 7.40 (dd, *J* = 8.0, 1.6 Hz, 1H), 7.34 (td, *J* = 7.6, 1.6 Hz, 1H), 7.15 (dd, *J* = 8.0, 1.2 Hz, 1H), 2.37 (s, 3H), 2.18 (s, 3H).

**<sup>13</sup>C NMR** (100 MHz, CDCl<sub>3</sub>) δ 168.4, 151.9, 148.9, 147.0, 135.8, 130.7, 129.7, 128.4, 125.3, 122.1, 121.9, 76.3, 76.0, 75.7, 19.9, 17.1.

**HRMS** (ESI) *m/z* calcd for C<sub>14</sub>H<sub>14</sub>NO<sub>2</sub><sup>+</sup> [M+H]<sup>+</sup>: 228.1019, found: 228.1019.

2-(5-methylpyridin-2-yl)-1,3-phenylene diacetate (**10a<sub>di</sub>**)

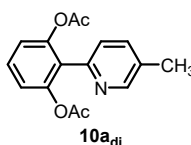

65.5 mg, 46% yield

**Physical State:** yellow solid

**<sup>1</sup>H NMR** (400 MHz, CDCl<sub>3</sub>) δ 8.43 (d, *J* = 2.4 Hz, 1H), 7.44 (dd, *J* = 8.0, 2.4 Hz, 1H), 7.32 (t, *J* = 8.0 Hz, 1H), 7.13 (d, *J* = 8.0 Hz, 1H), 7.00 (d, *J* = 8.0 Hz, 2H), 2.28 (s, 3H), 1.94 (s, 6H).

**<sup>13</sup>C NMR** (100 MHz, CDCl<sub>3</sub>) δ 168.9, 149.8, 149.2, 149.1, 136.6, 132.1, 129.1, 127.4, 124.5, 120.6, 20.6, 18.3.

**HRMS** (ESI) *m/z* calcd for C<sub>16</sub>H<sub>16</sub>NO<sub>4</sub><sup>+</sup> [M+H]<sup>+</sup>: 286.1074, found: 286.1074.

2-(6-methylpyridin-2-yl)phenyl acetate (**10b<sub>mono</sub>**)

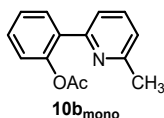

44.3 mg, 39% yield

**Physical State:** yellow oil

**<sup>1</sup>H NMR** (400 MHz, CDCl<sub>3</sub>) δ 7.60 (dd, *J* = 7.6, 2.0 Hz, 1H), 7.54 (t, *J* = 7.6 Hz, 1H), 7.33 (td, *J* = 7.6, 1.6 Hz, 1H), 7.28 – 7.22 (m, 2H), 7.07 (dd, *J* = 8.0, 1.6 Hz, 1H), 7.03 (d, *J* = 7.6 Hz, 1H), 2.53 (s, 3H), 2.09 (s, 3H).

$^{13}\text{C}$  NMR (100 MHz,  $\text{CDCl}_3$ )  $\delta$  168.4, 157.1, 154.1, 147.0, 135.6, 132.2, 129.9, 128.5, 125.3, 122.2, 120.8, 119.6, 23.6, 20.0.

**HRMS** (ESI)  $m/z$  calcd for  $\text{C}_{14}\text{H}_{14}\text{NO}_2^+$   $[\text{M}+\text{H}]^+$ : 228.1019, found: 228.1019.

2-(6-methylpyridin-2-yl)-1,3-phenylene diacetate (**10b<sub>di</sub>**)

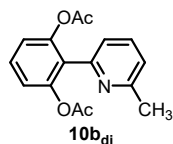

7.1 mg, 5% yield

**Physical State:** yellow oil

$^1\text{H}$  NMR (400 MHz,  $\text{CDCl}_3$ )  $\delta$  7.57 (t,  $J = 7.6$  Hz, 1H), 7.35 (t,  $J = 8.0$  Hz, 1H), 7.07 (dd,  $J = 8.0$ , 4.8 Hz, 2H), 7.03 (d,  $J = 8.0$  Hz, 2H), 2.54 (s, 3H), 1.96 (s, 6H).

$^{13}\text{C}$  NMR (100 MHz,  $\text{CDCl}_3$ )  $\delta$  168.9, 160.1, 155.6, 154.2, 149.0, 137.9, 130.4, 121.7, 121.0, 116.1, 113.7, 23.9, 21.4.

**HRMS** (ESI)  $m/z$  calcd for  $\text{C}_{16}\text{H}_{16}\text{NO}_4^+$   $[\text{M}+\text{H}]^+$ : 286.1074, found: 286.1074.

2-(4-methylpyridin-2-yl)phenyl acetate (**10c<sub>mono</sub>**)

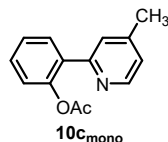

45.4 mg, 40% yield

**Physical State:** light orange oil

$^1\text{H}$  NMR (400 MHz,  $\text{CDCl}_3$ )  $\delta$  8.48 (d,  $J = 4.8$  Hz, 1H), 7.61 (dd,  $J = 7.6$ , 1.6 Hz, 1H), 7.36 (td,  $J = 7.6$ , 1.6 Hz, 1H), 7.28 (dd,  $J = 7.6$ , 1.2 Hz, 2H), 7.09 (dd,  $J = 8.0$ , 1.2 Hz, 1H), 7.02 (ddd,  $J = 5.2$ , 1.6, 0.8 Hz, 1H), 2.33 (s, 3H), 2.10 (s, 3H).

$^{13}\text{C}$  NMR (100 MHz,  $\text{CDCl}_3$ )  $\delta$  168.46, 154.72, 148.24, 147.08, 146.35, 132.23, 129.74, 128.56, 125.31, 123.45, 122.17, 20.13, 19.93.

**HRMS** (ESI)  $m/z$  calcd for  $\text{C}_{14}\text{H}_{14}\text{NO}_2^+$   $[\text{M}+\text{H}]^+$ : 228.1019, found: 228.1019.

2-(4-methylpyridin-2-yl)-1,3-phenylene diacetate (**10c<sub>di</sub>**)



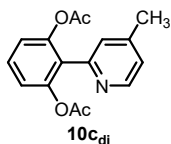

57.0 mg, 40% yield

**Physical State:** light orange solid

**<sup>1</sup>H NMR** (400 MHz, CDCl<sub>3</sub>) δ 8.54 (d, *J* = 4.8 Hz, 1H), 7.42 (t, *J* = 8.4 Hz, 1H), 7.13 (s, 1H), 7.09 (d, *J* = 8.0 Hz, 3H), 2.37 (s, 3H), 2.02 (s, 6H).

**<sup>13</sup>C NMR** (100 MHz, CDCl<sub>3</sub>) δ 169.1, 152.0, 149.2, 149.1, 147.4, 129.4, 127.5, 126.0, 123.7, 120.8, 21.2, 20.7.

**HRMS** (ESI) *m/z* calcd for C<sub>16</sub>H<sub>16</sub>NO<sub>4</sub><sup>+</sup> [M+H]<sup>+</sup>: 286.1074, found: 286.1074.

2-(3-methylpyridin-2-yl)phenyl acetate (**10d<sub>mono</sub>**)<sup>[7]</sup>

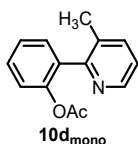

89.7 mg, 79% yield

**Physical State:** light yellow oil

**<sup>1</sup>H NMR** (400 MHz, CDCl<sub>3</sub>) δ 8.41 (d, *J* = 4.4 Hz, 1H), 7.47 (d, *J* = 7.6 Hz, 1H), 7.32 (td, *J* = 7.2, 1.2 Hz, 1H), 7.28 (dd, *J* = 7.6, 1.2 Hz, 1H), 7.22 (t, *J* = 7.2 Hz, 1H), 7.13 – 7.06 (m, 2H), 2.11 (s, 3H), 1.87 (s, 3H).

**<sup>13</sup>C NMR** (100 MHz, CDCl<sub>3</sub>) δ 167.8, 154.5, 147.1, 145.6, 136.9, 132.5, 131.2, 129.4, 128.2, 124.8, 121.7, 121.5, 19.5, 18.0.

**HRMS** (ESI) *m/z* calcd for C<sub>14</sub>H<sub>14</sub>NO<sub>2</sub><sup>+</sup> [M+H]<sup>+</sup>: 228.1019, found: 228.1019.

pyridine-2,6-diylbis(2,1-phenylene) diacetate (**10e<sub>di</sub>**)

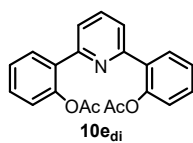

69.4 mg, 40% yield

**Physical State:** white solid

**<sup>1</sup>H NMR** (400 MHz, CDCl<sub>3</sub>) δ 7.70 (dd, *J* = 7.6, 1.6 Hz, 2H), 7.66 (d, *J* = 8.0 Hz, 1H), 7.42 (d, *J* = 7.6 Hz, 2H), 7.33 (td, *J* = 7.6, 1.6 Hz, 2H), 7.25 (td, *J* = 7.6, 1.6 Hz, 2H), 7.06 (dd, *J* = 8.0, 1.2 Hz, 2H), 1.96 (s, 6H).

**<sup>13</sup>C NMR** (100 MHz, CDCl<sub>3</sub>) δ 169.7, 155.4, 148.3, 136.6, 132.9, 131.1, 129.8, 126.4, 123.5, 121.9, 20.9.

**HRMS** (ESI) *m/z* calcd for C<sub>21</sub>H<sub>18</sub>NO<sub>4</sub><sup>+</sup> [M+H]<sup>+</sup>: 348.1230, found: 348.1230.

2-(pyrimidin-2-yl)phenyl acetate (**10f<sub>mono</sub>**)<sup>[7]</sup>

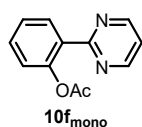

28.9 mg, 27% yield

**Physical State:** bright yellow solid

**<sup>1</sup>H NMR** (400 MHz, CDCl<sub>3</sub>) δ 8.80 (d, *J* = 4.8 Hz, 2H), 8.23 (dd, *J* = 8.0, 1.6 Hz, 1H), 7.50 (td, *J* = 7.6, 1.6 Hz, 1H), 7.38 (td, *J* = 7.6, 1.2 Hz, 1H), 7.20 (t, *J* = 4.8 Hz, 1H), 7.16 (dd, *J* = 8.0, 1.2 Hz, 1H), 2.30 (s, 3H).

**<sup>13</sup>C NMR** (101 MHz, CDCl<sub>3</sub>) δ 170.2, 164.0, 157.1, 149.5, 131.7, 131.5, 130.6, 126.4, 124.0, 119.2, 21.3.

**HRMS** (ESI) *m/z* calcd for C<sub>12</sub>H<sub>11</sub>N<sub>2</sub>O<sub>2</sub><sup>+</sup> [M+H]<sup>+</sup>: 215.0815, found: 215.0815.

2-(pyrimidin-2-yl)-1,3-phenylene diacetate (**10f<sub>di</sub>**)<sup>[6]</sup>

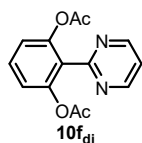

74.8 mg, 55% yield

**Physical State:** orange solid

**<sup>1</sup>H NMR** (400 MHz, CDCl<sub>3</sub>) δ 8.76 (d, *J* = 4.8 Hz, 2H), 7.42 (t, *J* = 8.4 Hz, 1H), 7.19 (d, *J* = 4.0 Hz, 1H), 7.06 (d, *J* = 8.4 Hz, 2H), 2.07 (s, 6H).

**<sup>13</sup>C NMR** (100 MHz, CDCl<sub>3</sub>) δ 169.3, 161.9, 156.9, 149.7, 130.2, 121.4, 119.5, 20.9.

**HRMS** (ESI) *m/z* calcd for C<sub>14</sub>H<sub>13</sub>N<sub>2</sub>O<sub>4</sub><sup>+</sup> [M+H]<sup>+</sup>: 273.0870, found: 273.0870.

(E)-2-(phenyldiazenyl)phenyl acetate (**10g<sub>mono</sub>**)<sup>[7]</sup>

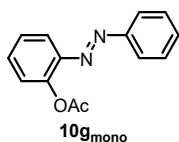

72.0 mg, 60% yield

**Physical State:** red oil

**<sup>1</sup>H NMR** (400 MHz, CDCl<sub>3</sub>) δ 7.76 (dd, *J* = 8.0, 1.6 Hz, 2H), 7.72 (dd, *J* = 8.0, 1.6 Hz, 1H), 7.41 – 7.35 (m, 4H), 7.23 (td, *J* = 8.0, 1.2 Hz, 1H), 7.14 (dd, *J* = 8.0, 1.2 Hz, 1H), 2.29 (s, 3H).

**<sup>13</sup>C NMR** (100 MHz, CDCl<sub>3</sub>) δ 168.5, 151.7, 147.9, 142.9, 131.0, 130.3, 128.0, 125.5, 122.3, 121.9, 116.6, 19.7.

**HRMS** (ESI) *m/z* calcd for C<sub>14</sub>H<sub>13</sub>N<sub>2</sub>O<sub>2</sub><sup>+</sup> [M+H]<sup>+</sup>: 241.0972, found: 241.0972.

(E)-2-(phenyldiazenyl)-1,3-phenylene diacetate (**10g<sub>di</sub>**)

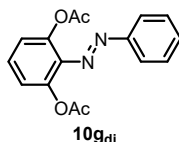

10.4 mg, 7% yield

**Physical State:** red solid

**<sup>1</sup>H NMR** (400 MHz, CDCl<sub>3</sub>) δ 7.71 – 7.69 (m, 1H), 7.68 (d, *J* = 2.0 Hz, 1H), 7.43 – 7.40 (m, 3H), 7.35 (t, *J* = 8.0 Hz, 1H), 7.04 (d, *J* = 8.0 Hz, 2H), 2.21 (s, 6H).

**<sup>13</sup>C NMR** (100 MHz, CDCl<sub>3</sub>) δ 168.0, 143.7, 130.7, 129.5, 128.2, 121.6, 120.6, 19.8.

**HRMS** (ESI) *m/z* calcd for C<sub>16</sub>H<sub>15</sub>N<sub>2</sub>O<sub>4</sub><sup>+</sup> [M+H]<sup>+</sup>: 299.1026, found: 299.1026.

2-(1H-pyrazol-1-yl)phenyl acetate (**10h<sub>mono</sub>**)<sup>[7]</sup>

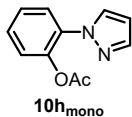

62.6 mg, 62% yield

**Physical State:** colorless oil

**<sup>1</sup>H NMR** (400 MHz, CDCl<sub>3</sub>) δ 7.64 (dd, *J* = 10.8, 1.6 Hz, 2H), 7.52 (dd, *J* = 7.2, 2.4 Hz, 1H), 7.29 – 7.22 (m, 2H), 7.12 (dd, *J* = 7.6, 2.0 Hz, 1H), 6.34 (t, *J* = 2.4 Hz, 1H), 2.10 (s, 3H).

**<sup>13</sup>C NMR** (100 MHz, CDCl<sub>3</sub>) δ 167.7, 142.2, 140.0, 132.1, 129.1, 127.3, 125.7, 124.6, 123.0, 106.0, 19.7.

**HRMS** (ESI)  $m/z$  calcd for  $C_{11}H_{11}N_2O_2^+$   $[M+H]^+$ : 203.0815, found: 203.0815.

2-(2H-imidazol-2-yl)-1,3-phenylene diacetate (**10h<sub>di</sub>**)

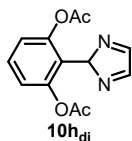

26.0 mg, 20% yield

**Physical State:** white solid

**<sup>1</sup>H NMR** (400 MHz,  $CDCl_3$ )  $\delta$  7.64 (d,  $J = 1.6$  Hz, 1H), 7.43 (d,  $J = 2.4$  Hz, 1H), 7.37 (t,  $J = 8.0$  Hz, 1H), 7.07 (d,  $J = 8.4$  Hz, 2H), 6.32 (t,  $J = 2.4$  Hz, 1H), 1.99 (s, 6H).

**<sup>13</sup>C NMR** (100 MHz,  $CDCl_3$ )  $\delta$  168.5, 146.9, 141.1, 131.9, 129.4, 121.2, 106.4, 20.4.

**HRMS** (ESI)  $m/z$  calcd for  $C_{13}H_{13}N_2O_4^+$   $[M+H]^+$ : 261.0870, found: 261.0870.

2-(6-chloro-3-phenylpyrazin-2-yl)phenyl acetate (**10i<sub>mono</sub>**)

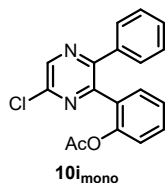

113.4 mg, 70% yield

**Physical State:** white solid

**<sup>1</sup>H NMR** (400 MHz,  $CDCl_3$ )  $\delta$  8.49 (s, 1H), 7.41 – 7.38 (m, 2H), 7.31 – 7.25 (m, 2H), 7.24 – 7.20 (m, 1H), 7.19 – 7.15 (m, 2H), 7.11 (td,  $J = 7.6, 1.2$  Hz, 1H), 7.03 (dd,  $J = 8.0, 1.2$  Hz, 1H), 1.89 (s, 3H).

**<sup>13</sup>C NMR** (100 MHz,  $CDCl_3$ )  $\delta$  168.3, 153.0, 148.0, 147.6, 147.1, 141.5, 136.6, 131.5, 130.5, 130.2, 129.6, 129.2, 128.3, 126.1, 123.1, 20.9.

**HRMS** (ESI)  $m/z$  calcd for  $C_{18}H_{14}ClN_2O_2^+$   $[M+H]^+$ : 325.0738, found: 325.0738.

2-(6-chloro-3-phenylpyrazin-2-yl)-1,3-phenylene diacetate (**10i<sub>di</sub>**)

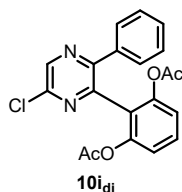

40.1 mg, 21% yield

**Physical State:** pale yellow solid

**<sup>1</sup>H NMR** (400 MHz, CDCl<sub>3</sub>) δ 8.54 (s, 1H), 7.48 – 7.45 (m, 2H), 7.35 (t, *J* = 8.4 Hz, 1H), 7.29 – 7.25 (m, 1H), 7.23 – 7.19 (m, 2H), 7.01 (d, *J* = 8.0 Hz, 2H), 1.90 (s, 6H).

**<sup>13</sup>C NMR** (100 MHz, CDCl<sub>3</sub>) δ 168.0, 154.0, 149.0, 147.8, 143.7, 141.6, 136.2, 130.1, 130.0, 128.8, 128.5, 120.6, 20.8.

**HRMS** (ESI) *m/z* calcd for C<sub>20</sub>H<sub>16</sub>ClN<sub>2</sub>O<sub>4</sub><sup>+</sup> [M+H]<sup>+</sup>: 383.0793, found: 383.0793.

## 9. C-H Iodination of 2-Phenylpyridine

### 9.1 Experimental procedures in batch

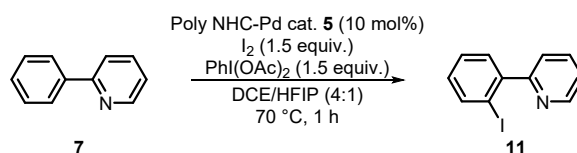

To a reaction tube was added **7** (0.4 mmol, 1.0 equiv.), diacetoxyiodo benzene (0.6 mmol, 1.5 equiv), iodine (0.6 mmol, 1.5 equiv.) and poly NHC-Pd catalyst **5** (0.04 mmol, 10 mol%) in DCE (3.2 mL) and HFIP (0.8 mL). The reaction mixture was heated to 70 °C for 1 h. Then the reaction mixture was removed in vacuum to afford the crude product, which was purified by short silica column flash chromatography (PE / DCM = 1:1) to give the product **11**. [12]

### 9.2 Experimental procedures in flow

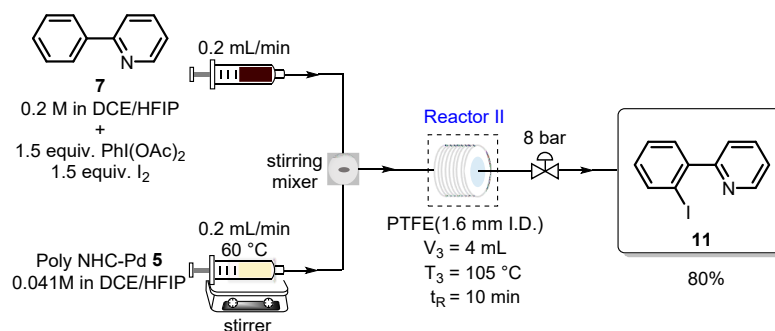

Two flow streams were delivered into the flow reactor by the syringe pump (Fusion 4000, CHEMYX). Stream 1 contained a solution of **7** (1.0 mmol, 1.0 equiv.), diacetoxyiodo benzene (1.5 mmol, 1.5 equiv.) and iodine (1.5 mmol, 1.5 equiv.) in DCE (4 mL) and HFIP (1 mL) premixed at 60 °C. Stream 2 contained a solution of poly NHC-Pd catalyst **5** (0.207 mmol) in DCE (4 mL) and

HFIP (1 mL). The glass syringe containing stream 2 wrapped with heating tapes set at 60 °C due to higher temperature is beneficial for the suspension of catalyst. In addition, a magnetic stirrer was beneath the heated glass syringe which prior filled with a magnetic stir bar to maintain the catalyst suspended evenly at 100 rpm. These stream were pumped each at a flow rate of 0.2 mL/min and mixed through a stainless steel CSTR and passed through a PTFE coil reactor (4 mL internal volume,  $t_R = 10$  min) at 105 °C. A 8.0 bar back-pressure regulator (BPR) was connected at the outlet of coil reactor. The output from the coil reactor was collected for 15 minutes (6 mL), then the reaction mixture was removed in vacuum to afford the crude product, which was purified by short silica column flash chromatography (PE / DCM = 1:1) to give the product **11**.

### 9.3 Characterization data of product **11**

2-(2-iodophenyl)pyridine (**11**) [8]

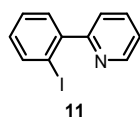

134.9 mg, 80% yield

**Physical State:** orange oil

**<sup>1</sup>H NMR** (400 MHz, CDCl<sub>3</sub>) δ 8.63 (ddd,  $J = 4.8, 2.0, 0.8$  Hz, 1H), 7.89 (dd,  $J = 8.0, 1.2$  Hz, 1H), 7.69 (td,  $J = 7.6, 1.6$  Hz, 1H), 7.43 (dt,  $J = 8.0, 1.2$  Hz, 1H), 7.39 – 7.33 (m, 2H), 7.25 – 7.20 (m, 1H), 7.03 – 6.98 (m, 1H).

**<sup>13</sup>C NMR** (100 MHz, CDCl<sub>3</sub>) δ 159.8, 148.2, 144.0, 138.7, 135.0, 129.3, 128.7, 127.2, 123.4, 121.5, 95.7.

**HRMS** (ESI)  $m/z$  calcd for C<sub>11</sub>H<sub>9</sub>IN<sup>+</sup> [M+H]<sup>+</sup>: 281.9774, found: 281.9774.

## 10. C-H Nitrosation of 2-Phenylpyridine

### 10.1 Experimental procedures in batch

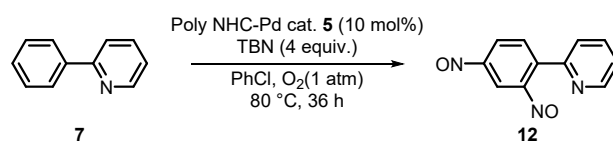

To a 10 mL Shlenk tube, poly NHC-Pd catalyst **5** (0.04 mmol, 10 mol%) was added. The flask was evacuated and backfilled with O<sub>2</sub> (3 cycles), then a solution of **7** (0.4 mmol, 1.0 equiv.), *tert*-butyl nitrite (1.6 mmol, 4.0 equiv) in 4 mL PhCl were added. The reaction mixture was heated to 80 °C for 36 h. Then the reaction mixture was removed in vacuum to afford the crude product, which was purified by short silica column flash chromatography (PE / EtOAc = 1:1) to give the product **12**.<sup>[13]</sup>

## 10.2 Experimental procedures in flow

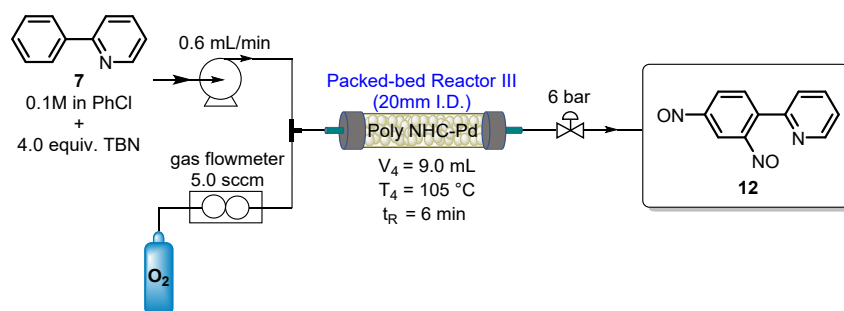

Two flow streams were delivered into the Packed-bed Reactor. Stream 1 contained a solution of **7** (1.5 mmol, 1.0 equiv.) and *tert*-butyl nitrite (6.0 mmol, 4.0 equiv) in PhCl (15 mL). Stream 1 was pumped at a flow rate of 0.6 mL/min by the plunger pump (AP0010, SANOTAC). Oxygen as stream 2 was pumped through a gas flow meter at a flow rate of 5.0 sccm. These stream were pumped through a packed-bed reactor (9.0 mL internal volume,  $t_R = 6$  min, 500 mg poly NHC-Pd catalyst **5** and 2.5 g 60-80 mesh silica gel powder were packed in it) at 105 °C. A 6.0 bar back-pressure regulator (BPR) was connected at the outlet of packed-bed reactor. The output from the packed-bed reactor was collected for 15 minutes (9.0 mL), then the reaction mixture was removed in vacuum to afford the crude product, which was purified by short silica column flash chromatography (PE / DCM = 1:1) to give the product **12**.

## 10.3 Characterization data of product 12

2-(2,4-dinitrosophenyl)pyridine (**12**)

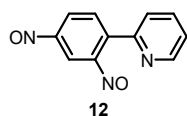

149.6 mg, 78% yield

**Physical State:** bright yellow solid

**<sup>1</sup>H NMR** (400 MHz, CDCl<sub>3</sub>) δ 9.15 (dd, J = 2.0, 0.8 Hz, 1H), 8.90 (dt, J = 6.8, 0.8 Hz, 1H), 8.41 (dd, J = 9.6, 2.0 Hz, 1H), 8.28 (dt, J = 8.4, 1.2 Hz, 1H), 7.83 (dd, J = 9.2, 0.8 Hz, 1H), 7.66 – 7.61 (m, 1H), 7.42 (td, J = 6.8, 1.6 Hz, 1H).

**<sup>13</sup>C NMR** (100 MHz, CDCl<sub>3</sub>) δ 151.49, 140.77, 137.74, 129.26, 125.42, 123.40, 118.96, 118.51, 118.40, 115.88, 114.14.

**HRMS** (ESI) m/z calcd for C<sub>11</sub>H<sub>8</sub>N<sub>3</sub>O<sub>2</sub><sup>+</sup> [M+H]<sup>+</sup>: 214.0611, found: 214.0611.

## 11. X-Ray Crystallography of NHC-Pds

### 11.1 Single crystal X-Ray Diffraction data of **1**

Compound **1** (10.0 mg) was dissolved in DCM (5.0 mL) and filtered to remove insoluble materials. The solution was added acetone (5.0 mL) and kept at room temperature until a single crystal was obtained. The crystals were subjected for single crystal XRD to determine the absolute configuration of **1**.

CCDC number : 2328748

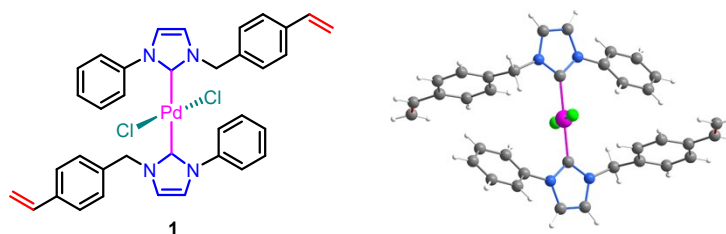

**Figure S1.** The X-Ray Crystallographic Structure of **1**

**Table S5** Crystal data and structure refinement for **1**

| Identification code  | Compound <b>1</b>                                                 |
|----------------------|-------------------------------------------------------------------|
| Empirical formula    | C <sub>36</sub> H <sub>32</sub> Cl <sub>2</sub> N <sub>4</sub> Pd |
| Formula weight       | 697.95                                                            |
| Temperature          | 173(2) K                                                          |
| Wavelength           | 1.34139 Å                                                         |
| Crystal system       | Monoclinic                                                        |
| Space group          | P2 <sub>1</sub> /c                                                |
| Unit cell dimensions | a = 12.9658(6) Å      a = 90°.                                    |



|                                        |                                                              |                            |
|----------------------------------------|--------------------------------------------------------------|----------------------------|
|                                        | $b = 8.7755(4) \text{ \AA}$                                  | $b = 107.5090(10)^\circ$ . |
|                                        | $c = 14.1054(7) \text{ \AA}$                                 | $g = 90^\circ$ .           |
| Volume                                 | $1530.57(13) \text{ \AA}^3$                                  |                            |
| Z                                      | 2                                                            |                            |
| Density (calculated)                   | $1.514 \text{ Mg/m}^3$                                       |                            |
| Absorption coefficient                 | $4.547 \text{ mm}^{-1}$                                      |                            |
| F(000)                                 | 712                                                          |                            |
| Crystal size                           | $0.190 \times 0.170 \times 0.160 \text{ mm}^3$               |                            |
| Theta range for data collection        | $5.378 \text{ to } 54.941^\circ$ .                           |                            |
| Index ranges                           | $-15 \leq h \leq 15, -10 \leq k \leq 10, -17 \leq l \leq 17$ |                            |
| Reflections collected                  | 21030                                                        |                            |
| Independent reflections                | 2897 [R(int) = 0.0366]                                       |                            |
| Completeness to theta = $53.594^\circ$ | 99.4 %                                                       |                            |
| Absorption correction                  | Semi-empirical from equivalents                              |                            |
| Max. and min. transmission             | 0.751 and 0.595                                              |                            |
| Refinement method                      | Full-matrix least-squares on $F^2$                           |                            |
| Data / restraints / parameters         | 2897 / 0 / 196                                               |                            |
| Goodness-of-fit on $F^2$               | 1.089                                                        |                            |
| Final R indices [ $I > 2\sigma(I)$ ]   | R1 = 0.0207, wR2 = 0.0517                                    |                            |
| R indices (all data)                   | R1 = 0.0232, wR2 = 0.0533                                    |                            |
| Extinction coefficient                 | n/a                                                          |                            |
| Largest diff. peak and hole            | 0.359 and $-0.449 \text{ e.\AA}^{-3}$                        |                            |

## 11.2 Single crystal X-Ray Diffraction data of 2

Compound **2** (10.0 mg) was dissolved in DCM (5.0 mL) and filtered to remove insoluble materials. The solution was added  $\text{CH}_3\text{CN}$  (5.0 mL) and kept at room temperature until a single crystal was obtained. The crystals were subjected for single crystal XRD to determine the absolute configuration of **2**.

CCDC number : 2328770

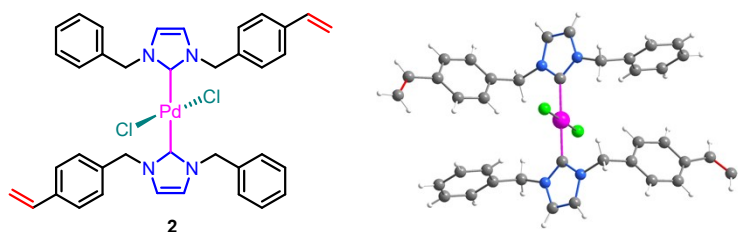

**Figure S2.** The X-Ray Crystallographic Structure of **2**

**Table S6** Crystal data and structure refinement for **2**

| Identification code               | Compound <b>2</b>                                                                                |
|-----------------------------------|--------------------------------------------------------------------------------------------------|
| Empirical formula                 | C <sub>38</sub> H <sub>36</sub> Cl <sub>2</sub> N <sub>4</sub> Pd                                |
| Formula weight                    | 726.01                                                                                           |
| Temperature                       | 258(2) K                                                                                         |
| Wavelength                        | 0.71073 Å                                                                                        |
| Crystal system                    | Monoclinic                                                                                       |
| Space group                       | P2 <sub>1</sub> /n                                                                               |
| Unit cell dimensions              | a = 10.665(3) Å    a = 90°.<br>b = 8.580(3) Å    b = 102.789(7)°.<br>c = 18.918(6) Å    g = 90°. |
| Volume                            | 1688.1(8) Å <sup>3</sup>                                                                         |
| Z                                 | 2                                                                                                |
| Density (calculated)              | 1.428 Mg/m <sup>3</sup>                                                                          |
| Absorption coefficient            | 0.741 mm <sup>-1</sup>                                                                           |
| F(000)                            | 744                                                                                              |
| Crystal size                      | 0.180 x 0.150 x 0.040 mm <sup>3</sup>                                                            |
| Theta range for data collection   | 2.452 to 27.546°.                                                                                |
| Index ranges                      | -12 ≤ h ≤ 13, -11 ≤ k ≤ 11, -24 ≤ l ≤ 24                                                         |
| Reflections collected             | 13726                                                                                            |
| Independent reflections           | 3888 [R(int) = 0.0584]                                                                           |
| Completeness to theta = 25.242°   | 99.9 %                                                                                           |
| Absorption correction             | Semi-empirical from equivalents                                                                  |
| Max. and min. transmission        | 0.746 and 0.688                                                                                  |
| Refinement method                 | Full-matrix least-squares on F <sup>2</sup>                                                      |
| Data / restraints / parameters    | 3888 / 31 / 224                                                                                  |
| Goodness-of-fit on F <sup>2</sup> | 1.025                                                                                            |
| Final R indices [I > 2σ(I)]       | R1 = 0.0387, wR2 = 0.0719                                                                        |
| R indices (all data)              | R1 = 0.0611, wR2 = 0.0826                                                                        |
| Extinction coefficient            | n/a                                                                                              |
| Largest diff. peak and hole       | 0.276 and -0.419 e.Å <sup>-3</sup>                                                               |

### 11.3 Single crystal X-Ray Diffraction data of **3**

Compound **3** (10.0 mg) was dissolved in DCM (5.0 mL) and filtered to remove insoluble materials. The solution was added acetone (5.0 mL) and kept at room temperature until a single crystal was obtained. The crystals were subjected for single crystal XRD to determine the absolute configuration of **3**.

CCDC number : 2328769

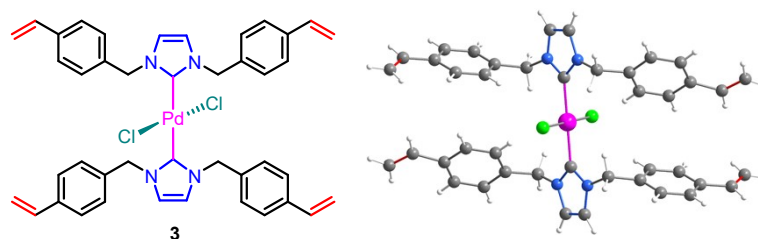

**Figure S3.** The X-Ray Crystallographic Structure of **3**

**Table S7** Crystal data and structure refinement for **3**

| Identification code               | Compound <b>3</b>                                                                                           |
|-----------------------------------|-------------------------------------------------------------------------------------------------------------|
| Empirical formula                 | C <sub>45</sub> H <sub>46</sub> Cl <sub>2</sub> N <sub>4</sub> OPd                                          |
| Formula weight                    | 836.16                                                                                                      |
| Temperature                       | 173(2) K                                                                                                    |
| Wavelength                        | 1.34139 Å                                                                                                   |
| Crystal system                    | Monoclinic                                                                                                  |
| Space group                       | C2/c                                                                                                        |
| Unit cell dimensions              | a = 28.7181(12) Å      a = 90°.<br>b = 8.3216(3) Å      b = 121.915(2)°.<br>c = 20.0167(10) Å      g = 90°. |
| Volume                            | 4060.5(3) Å <sup>3</sup>                                                                                    |
| Z                                 | 4                                                                                                           |
| Density (calculated)              | 1.368 Mg/m <sup>3</sup>                                                                                     |
| Absorption coefficient            | 3.499 mm <sup>-1</sup>                                                                                      |
| F(000)                            | 1728                                                                                                        |
| Crystal size                      | 0.320 x 0.260 x 0.250 mm <sup>3</sup>                                                                       |
| Theta range for data collection   | 4.528 to 54.981°.                                                                                           |
| Index ranges                      | -34 ≤ h ≤ 34, -10 ≤ k ≤ 9, -23 ≤ l ≤ 24                                                                     |
| Reflections collected             | 23210                                                                                                       |
| Independent reflections           | 3865 [R(int) = 0.0667]                                                                                      |
| Completeness to theta = 53.594°   | 99.8 %                                                                                                      |
| Absorption correction             | Semi-empirical from equivalents                                                                             |
| Max. and min. transmission        | 0.751 and 0.334                                                                                             |
| Refinement method                 | Full-matrix least-squares on F <sup>2</sup>                                                                 |
| Data / restraints / parameters    | 3865 / 38 / 272                                                                                             |
| Goodness-of-fit on F <sup>2</sup> | 1.061                                                                                                       |
| Final R indices [I > 2σ(I)]       | R1 = 0.0372, wR2 = 0.0978                                                                                   |
| R indices (all data)              | R1 = 0.0397, wR2 = 0.0997                                                                                   |
| Extinction coefficient            | n/a                                                                                                         |
| Largest diff. peak and hole       | 1.424 and -1.336 e.Å <sup>-3</sup>                                                                          |

## 12. Image of the Flow System

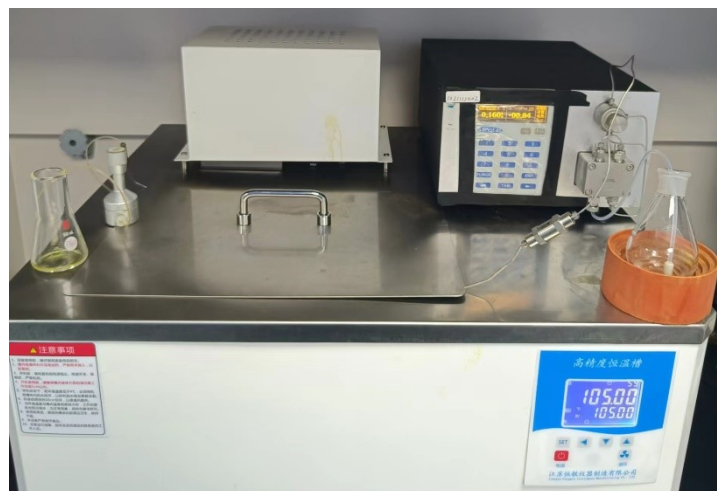

**Figure S4.** Continuous Packed-bed Reactor I setup  
(C-H acetoxylation of arenes step)

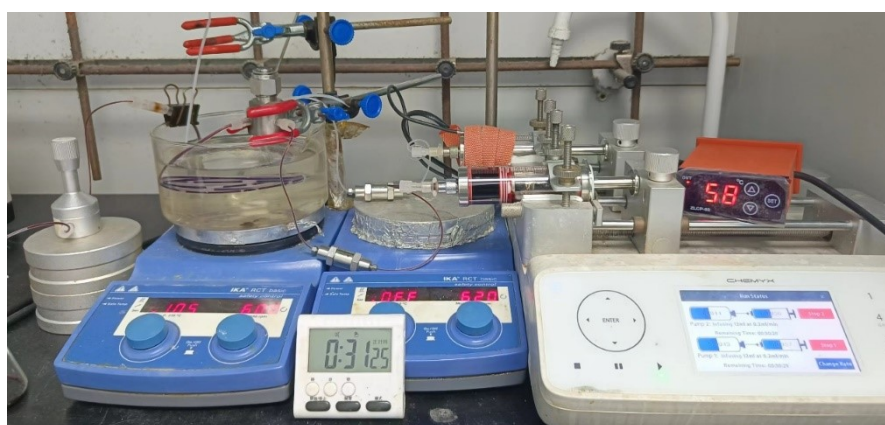

**Figure S5.** Continuous coil reactor II setup  
(C-H iodination of 2-phenylpyridine step)

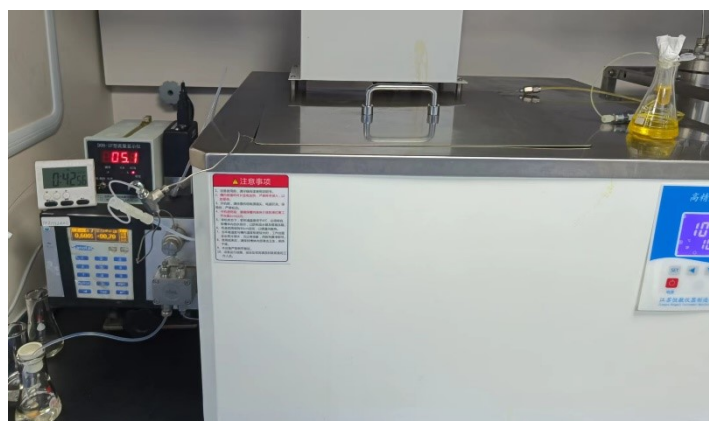

**Figure S6.** Continuous Packed-bed Reactor III setup  
(C-H nitrosation of 2-phenylpyridine step)

### 13. References

- [1] Kim, J.-H.; Kim, J.-W.; Shokouhimehr, M.; Lee, Y.-S., Polymer-Supported N-Heterocyclic Carbene-Palladium Complex for Heterogeneous Suzuki Cross-Coupling Reaction. *J. Org. Chem.* **2005**, *70* (17), 6714-6720.
- [2] Akkoc, S.; Gok, Y., Polymer-Supported N-Heterocyclic Carbene-Palladium Complex for Heterogeneous Suzuki Cross-Coupling Reaction. *J. Coord. Chem.*, **2013**, *66* (8), 1396-1404.
- [3] Doherty, S.; Knight, J.-G.; Backhouse, T.; Abood, E.; Alshaikh, H.; I. J. S. Fairlamb, I.-J.-S.; Bourne, R.-A.; Chamberlainc, T.-W.; Stones, R., Highly efficient aqueous phase chemoselective hydrogenation of  $\alpha,\beta$ -unsaturated aldehydes catalysed by phosphine-decorated polymer immobilized IL-stabilized PdNPs. *Green Chem.*, **2017**, *19*, 1635-1641.
- [4] Berardi, S.; Carraro, M.; Iglesias, M.; Sartorel, M.; Scorrano, G.; Albrecht, M.; Bonchio, M., Polyoxometalate-Based N-Heterocyclic Carbene (NHC) Complexes for Palladium-Mediated C-C Coupling and Chloroaryl Dehalogenation Catalysis. *Chem. Eur. J.* **2010**, *16* (35), 10662-10666.
- [5] Dong, X.-L.; Wu, R.A.; Dong, J.; Wu, M.-H.; Zhu, Y.; Zou, H.-F., Polyacrylamide-based monolithic capillary column with coating of cellulose tris(3,5-dimethylphenyl-carbamate) for enantiomer separation in capillary electrochromatography. *Electrophoresis* **2008**, *29* (4), 919-927.
- [6] Zheng, X.-J.; Song, B.-R.; Xu, B., Palladium-Catalyzed Regioselective C-H Bond ortho-Acetoxylation of Arylpyrimidines. *Eur. J. Org. Chem.* **2010**, *23*, 4376-4380.
- [7] Wu, Y.; Zhou, B., Rhodium(III)-Catalyzed Selective C-H Acetoxylation and Hydroxylation Reactions. *Org. Lett.* **2017**, *19*, 3532-3535.
- [8] Chen, X.; Hao, X.-S.; Goodhue, C.-E.; Yu, J.-Q., Cu(II)-Catalyzed Functionalizations of Aryl C-H Bonds Using O<sub>2</sub> as an Oxidant. *J. AM. Chem. Soc.* **2006**, *128*, 6790-6791.
- [9] Ahmad, M.-S.; Wang, Q.-F.; Meguellatia, K., Cu-catalyzed selective Oxygenation of Aryl C-H Bonds with O<sub>2</sub> and MnO<sub>2</sub> as Terminal Oxidants. *Synlett* **2022**. doi: 10.1055/a-1906-2916.
- [10] Zhang, Y.; Yu Zhao, Y.; Luo, Y.; Xiao, L.-Q.; Huang, Y.-X.; Li, X.-R.; Peng, Q.-T.; Liu, Y.-Z., Directed Aromatic C-H Activation/Acetoxylation Catalyzed by Pd Nanoparticles Supported on Graphene Oxide. *Org. Lett.* **2017**, *19*, 6470-6473.
- [11] Dick, A.-R.; Hull, K.-L.; Sanford, M.-S., A Highly Selective Catalytic Method for the Oxidative Functionalization of C-H Bonds. *J. AM. Chem. Soc.* **2004**, *126*, 2300-2301.
- [12] Wang, D.-H.; Xue-Shi Hao, X.-S.; Wu, D.-F.; Yu, J.-Q., Palladium-Catalyzed Oxidation of Boc-Protected N-Methylamines with IOAc as the Oxidant: A Boc-Directed sp<sup>3</sup> C-H Bond Activation. *Org. Lett.* **2006**, *8* (15), 3387-3390.
- [13] Liang, Y.-F.; Li, X.-Y.; Wang, X.-Y.; Yan, Y.-P.; Feng, P.; Jiao, N., Aerobic Oxidation of Pd<sup>II</sup> to Pd<sup>IV</sup> by Active Radical Reactants: Direct C-H Nitration and Acylation of Arenes via Oxygenation Process with Molecular Oxygen. *ACS Catal.* **2015**, *5*, 1956-1963.

## 14. NMR Spectra

1-phenyl-3-(4-vinylbenzyl)-1H-imidazol-3-ium chloride (**13a**)

$^1\text{H}$  NMR (400 MHz,  $\text{DMSO-}d_6$ )

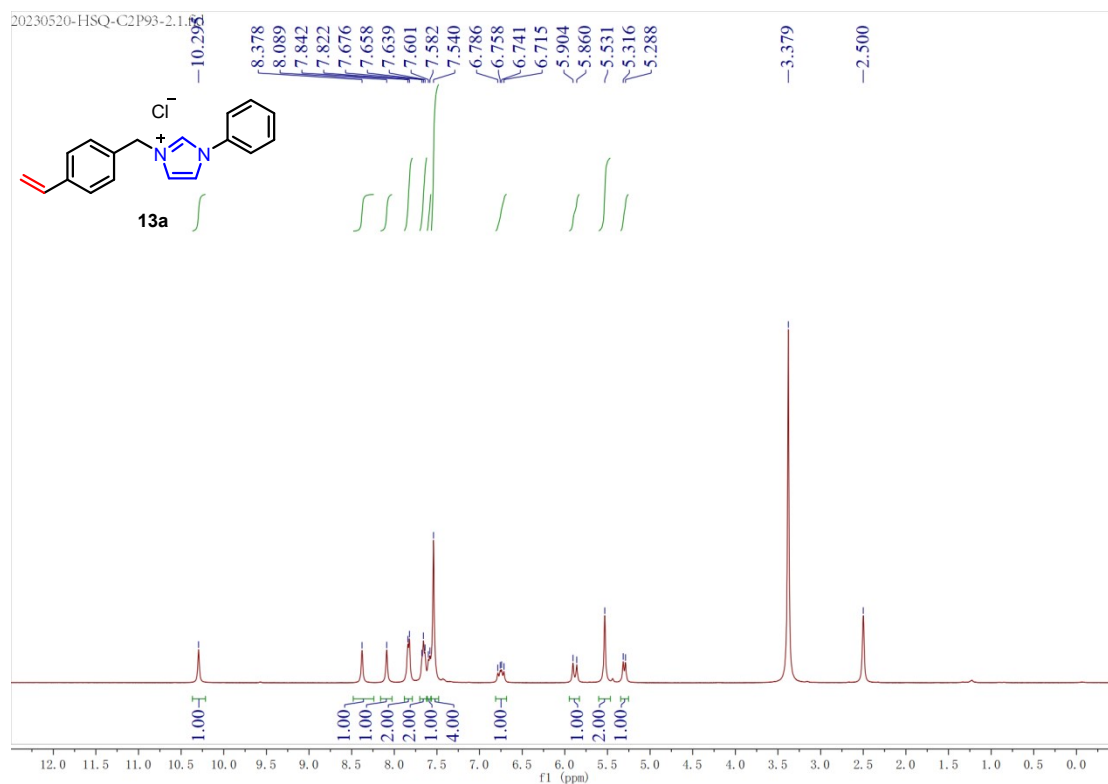

$^{13}\text{C}$  NMR (100 MHz,  $\text{DMSO-}d_6$ )

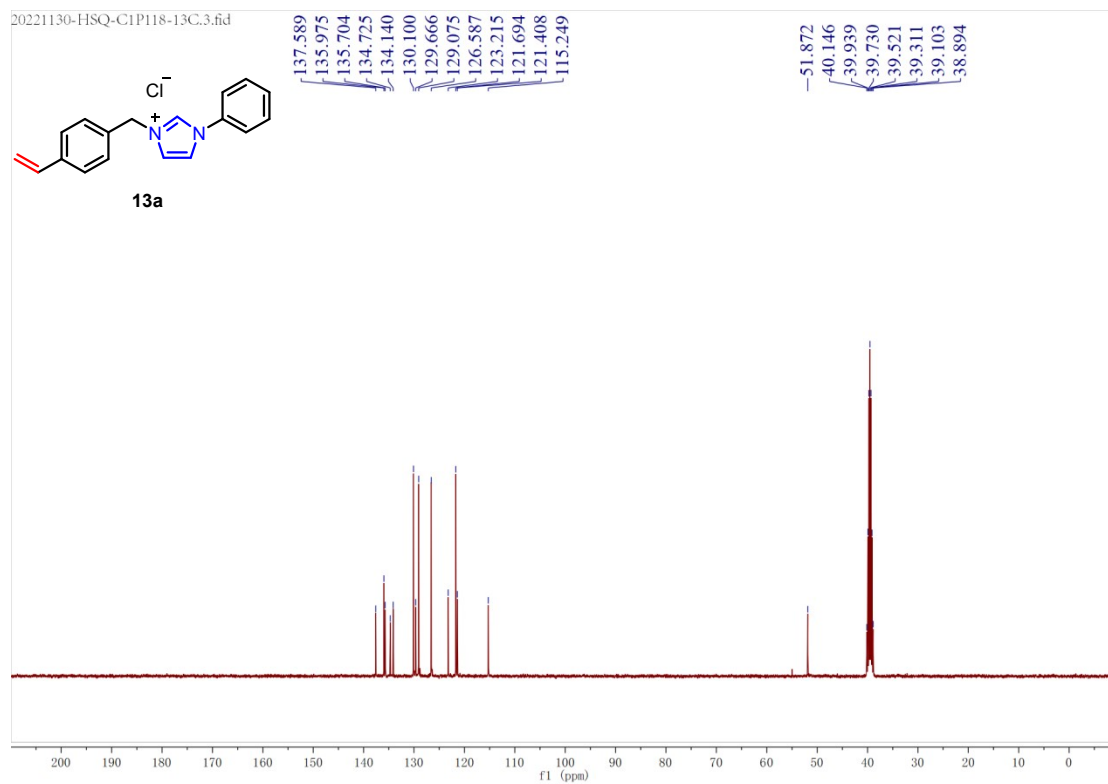

1-benzyl-3-(4-vinylbenzyl)-1H-imidazol-3-ium chloride (**13b**)

**<sup>1</sup>H NMR (400 MHz, DMSO-*d*<sub>6</sub>)**

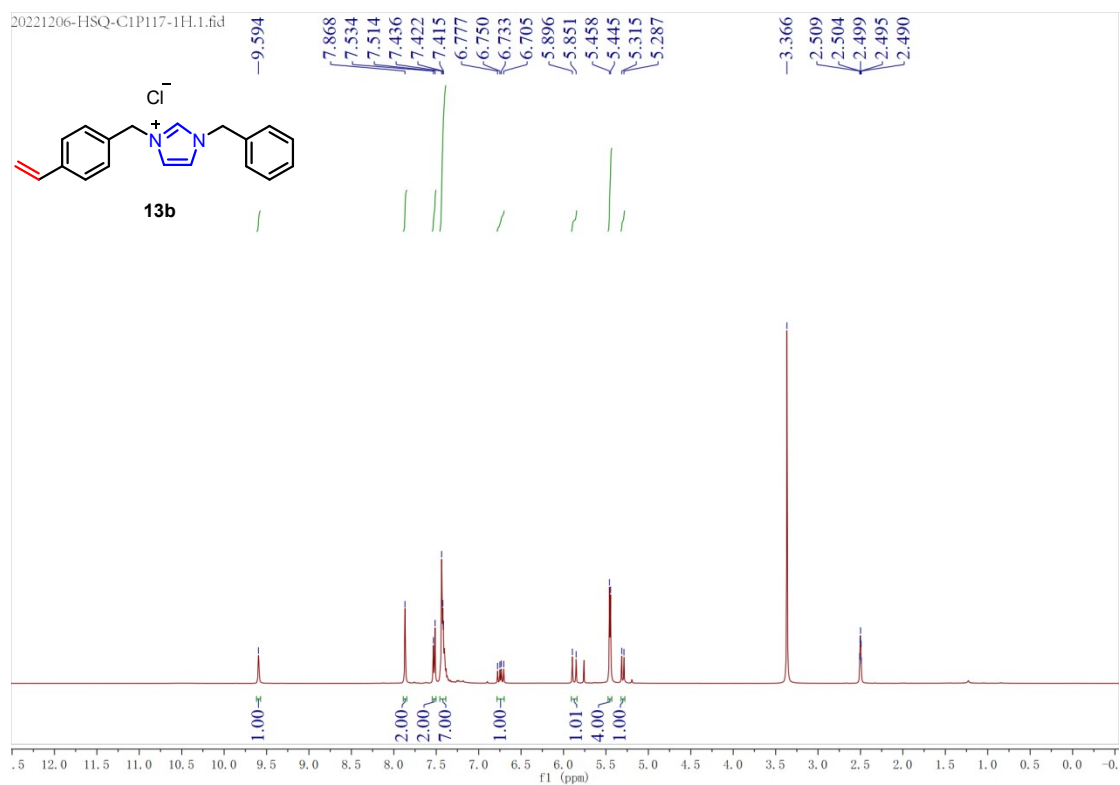

**<sup>13</sup>C NMR (100 MHz, DMSO-*d*<sub>6</sub>)**

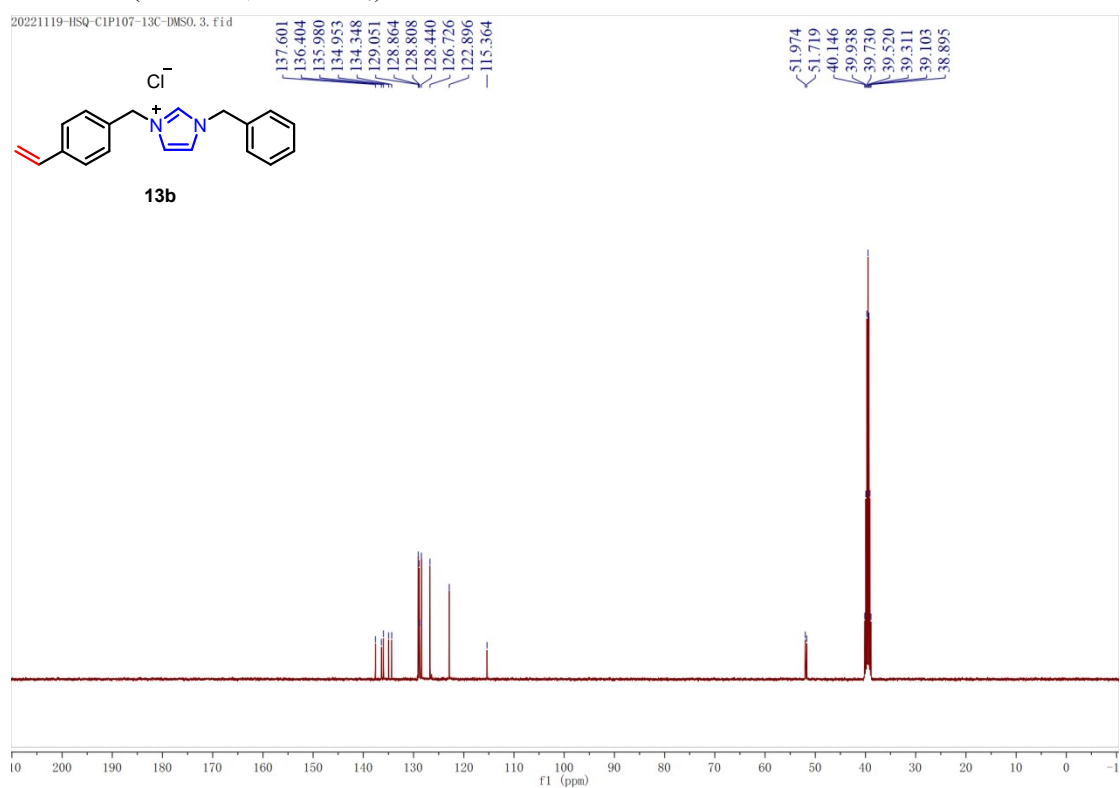

1,3-bis(4-vinylbenzyl)-1H-imidazol-3-ium chloride (**13c**)

### <sup>1</sup>H NMR (400 MHz, CD<sub>3</sub>OD)

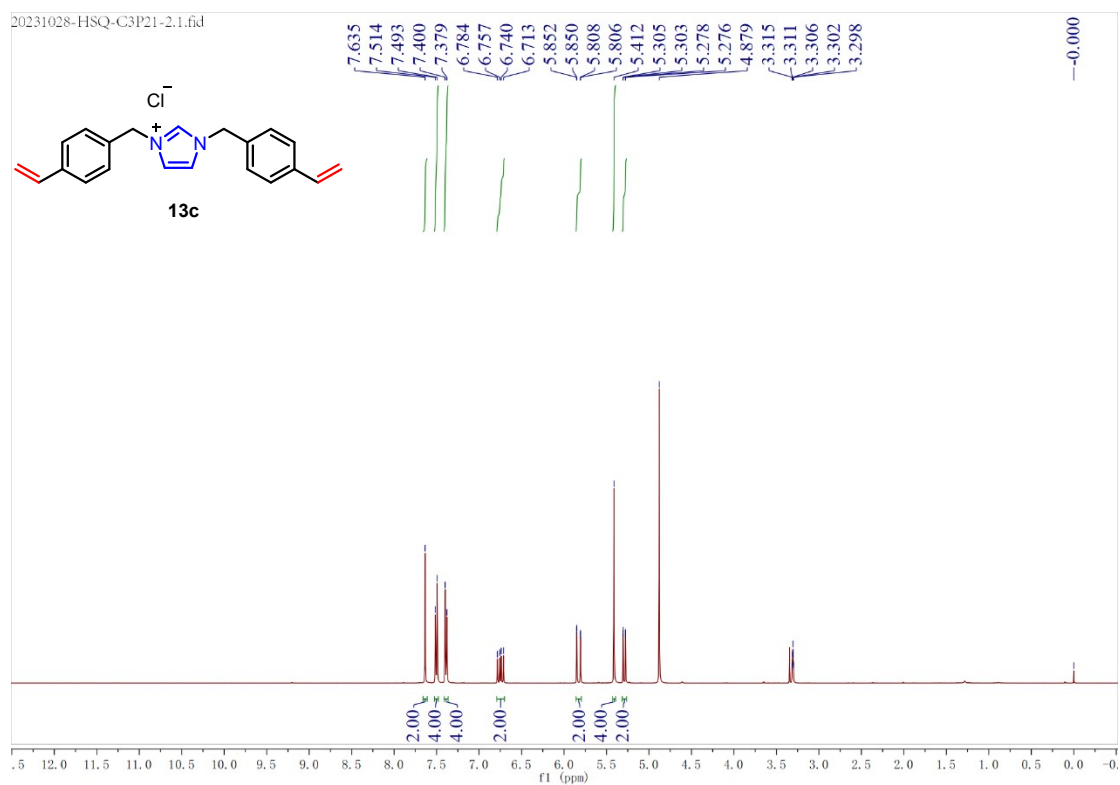

### <sup>13</sup>C NMR (100 MHz, CD<sub>3</sub>OD)

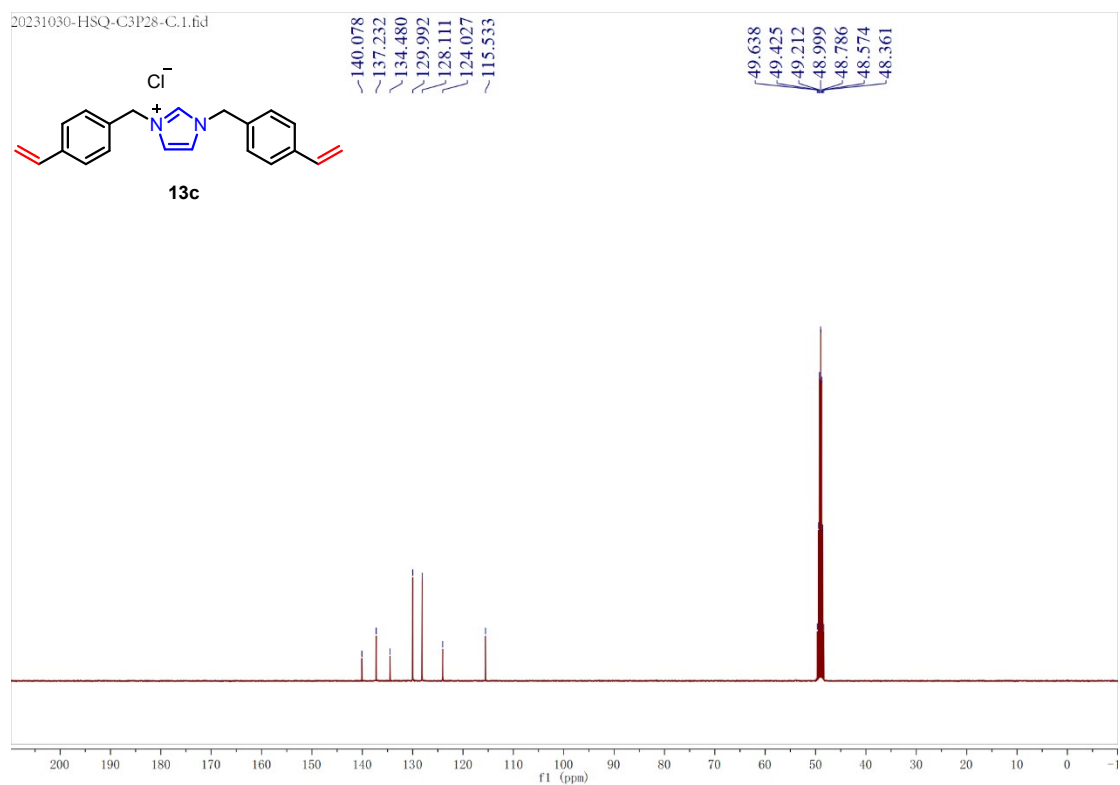

### bis(1-phenyl-3-(4-vinylbenzyl)-2,3-dihydro-1H-imidazol-2-yl)palladium(IV) chloride (**1**)

#### <sup>1</sup>H NMR (400 MHz, CDCl<sub>3</sub>)



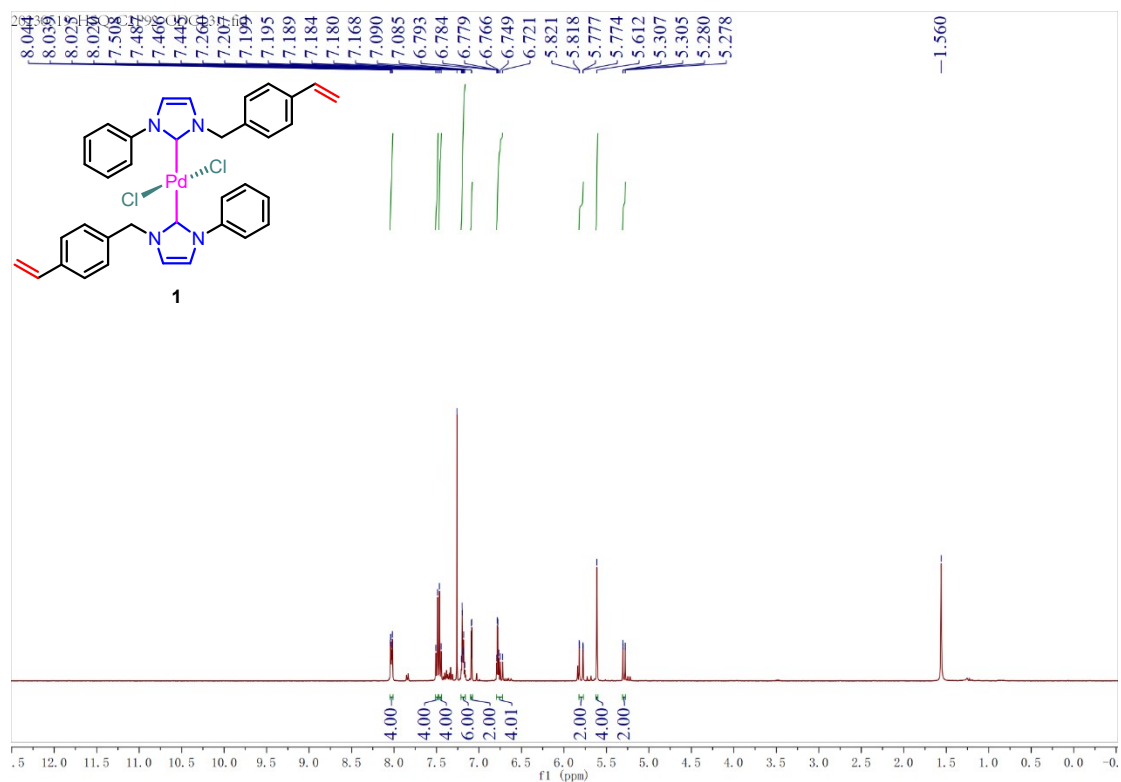

**<sup>13</sup>C NMR (100 MHz, CDCl<sub>3</sub>)**

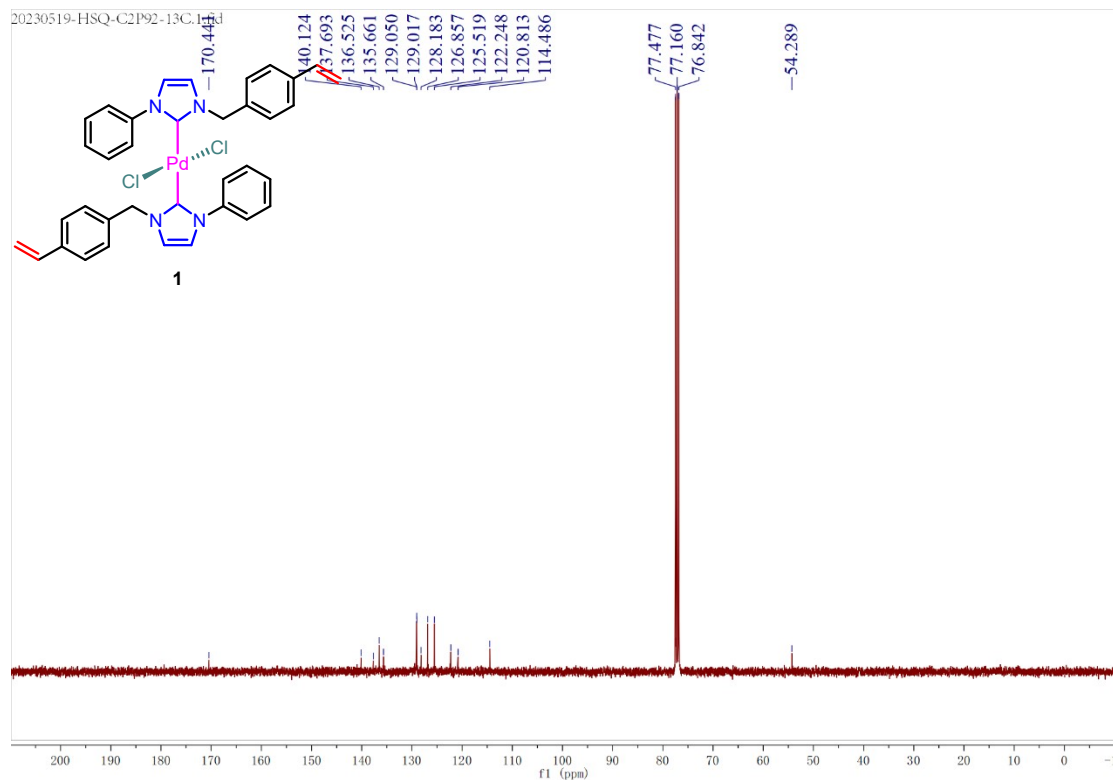

**bis(1-benzyl-3-(4-vinylbenzyl)-2,3-dihydro-1H-imidazol-2-yl)palladium(IV) chloride (**2**)**

**<sup>1</sup>H NMR (400 MHz, CDCl<sub>3</sub>)**

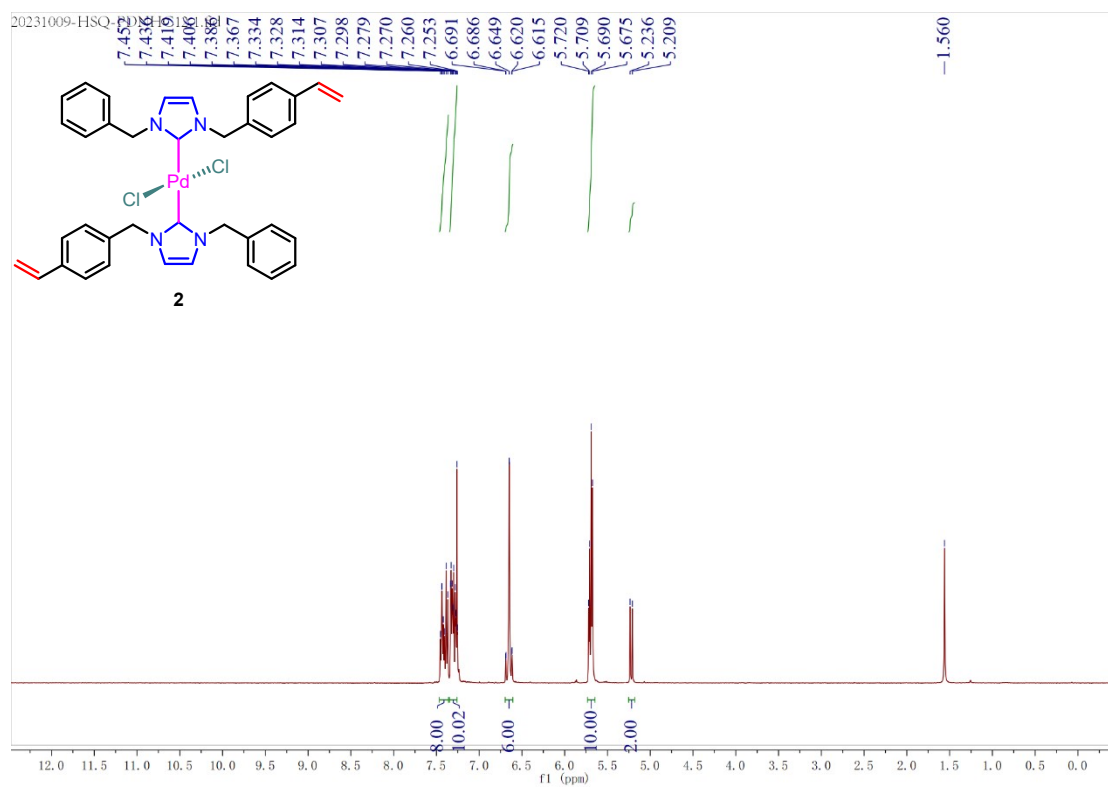

$^{13}\text{C}$  NMR (100 MHz,  $\text{CDCl}_3$ )

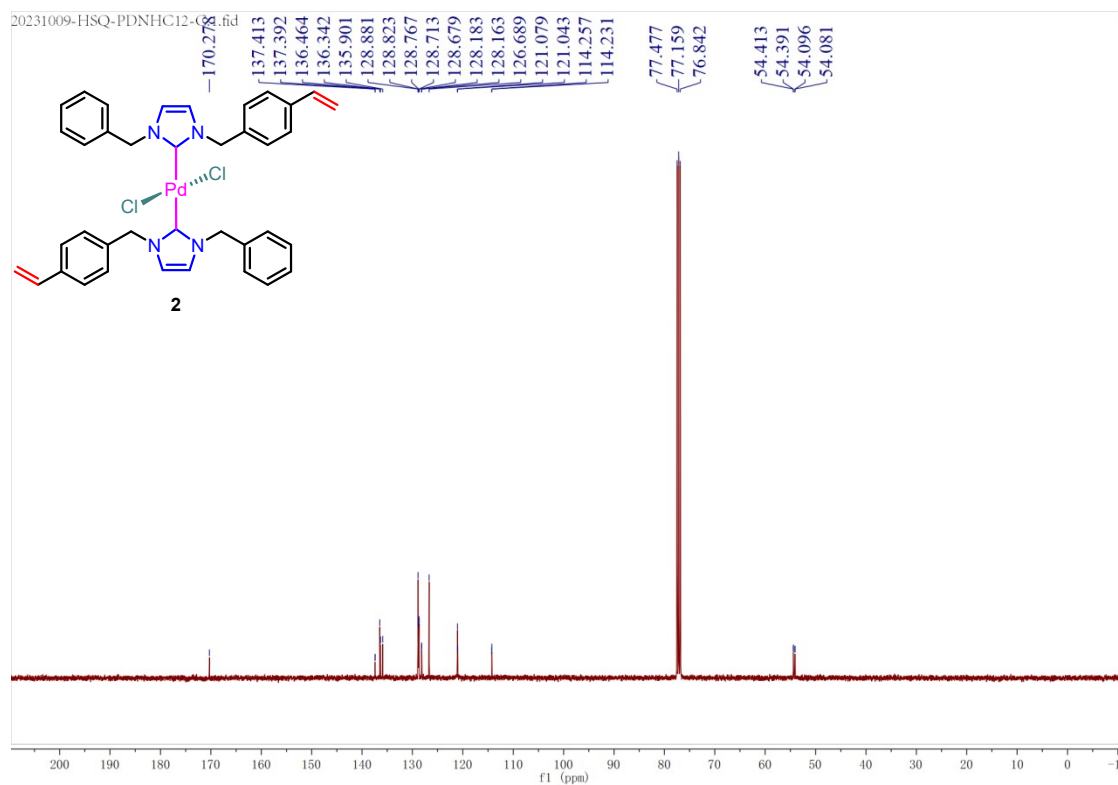

bis(1,3-bis(4-vinylbenzyl)-2,3-dihydro-1H-imidazol-2-yl)palladium(IV) chloride (**3**)

$^1\text{H}$  NMR (400 MHz,  $\text{CDCl}_3$ )

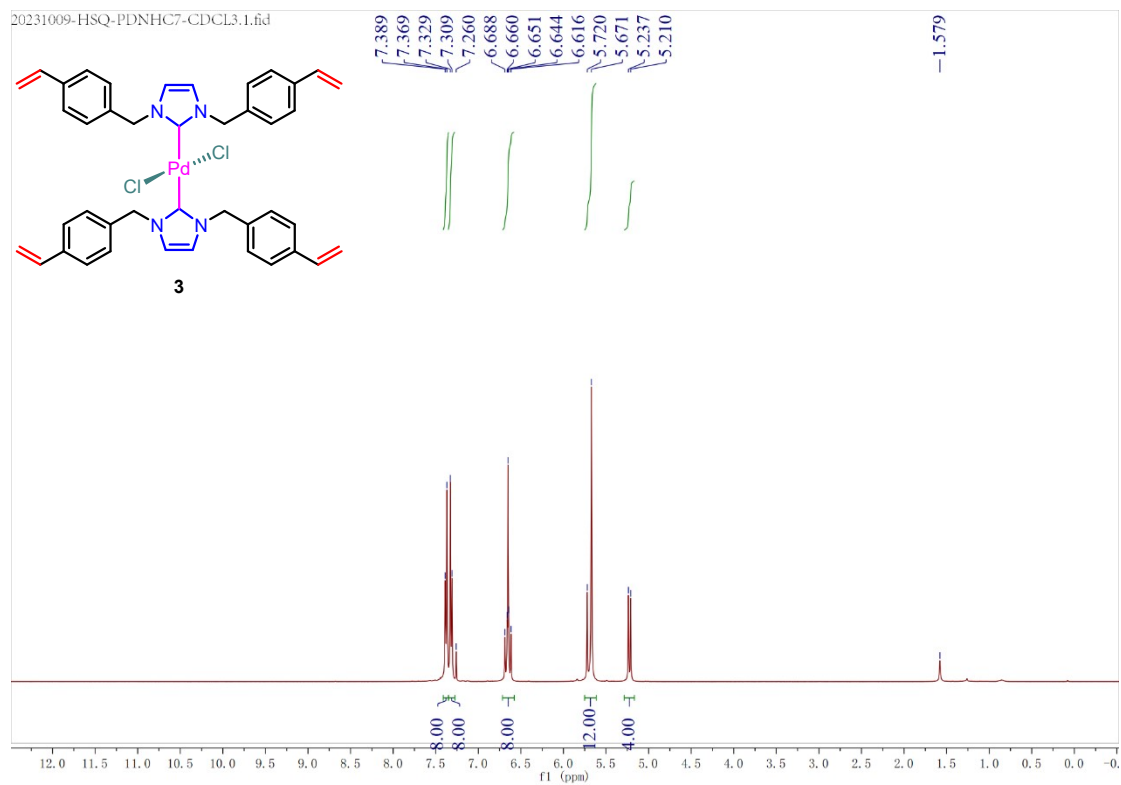

**<sup>13</sup>C NMR (100 MHz, CDCl<sub>3</sub>)**

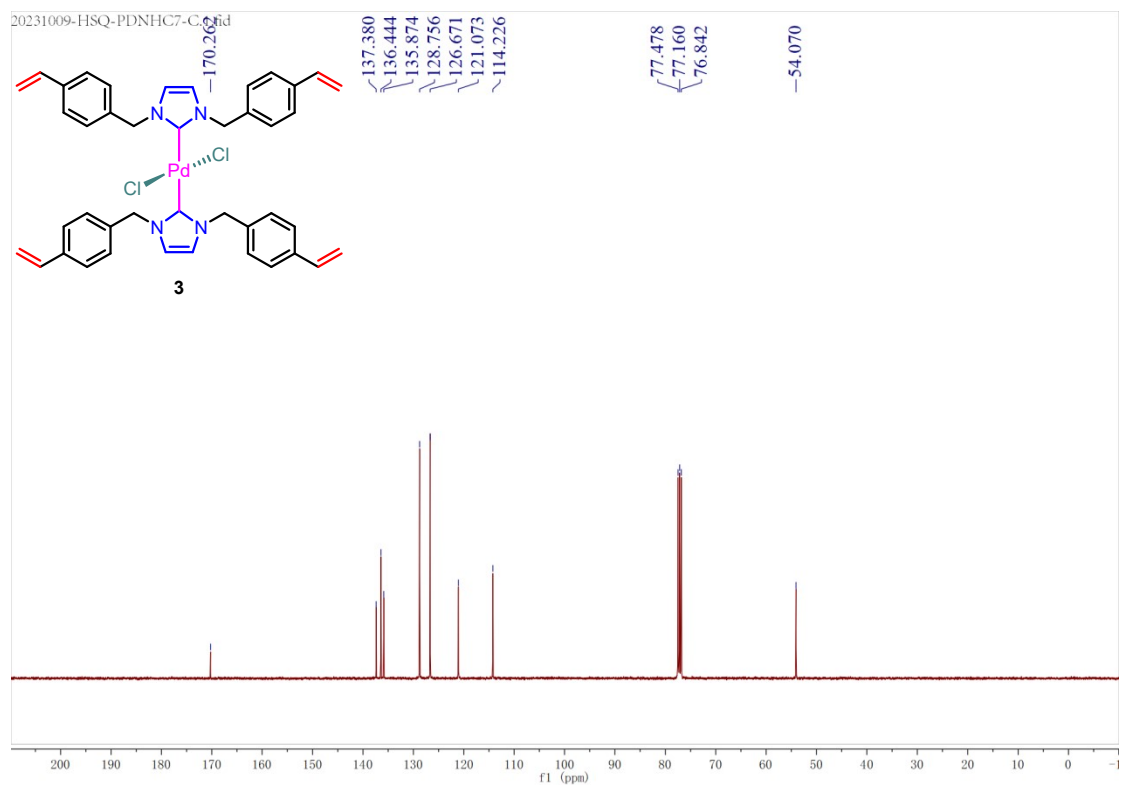

2-(pyridin-2-yl)phenyl acetate (**8a<sub>mono</sub>**)

**<sup>1</sup>H NMR (400 MHz, CDCl<sub>3</sub>)**

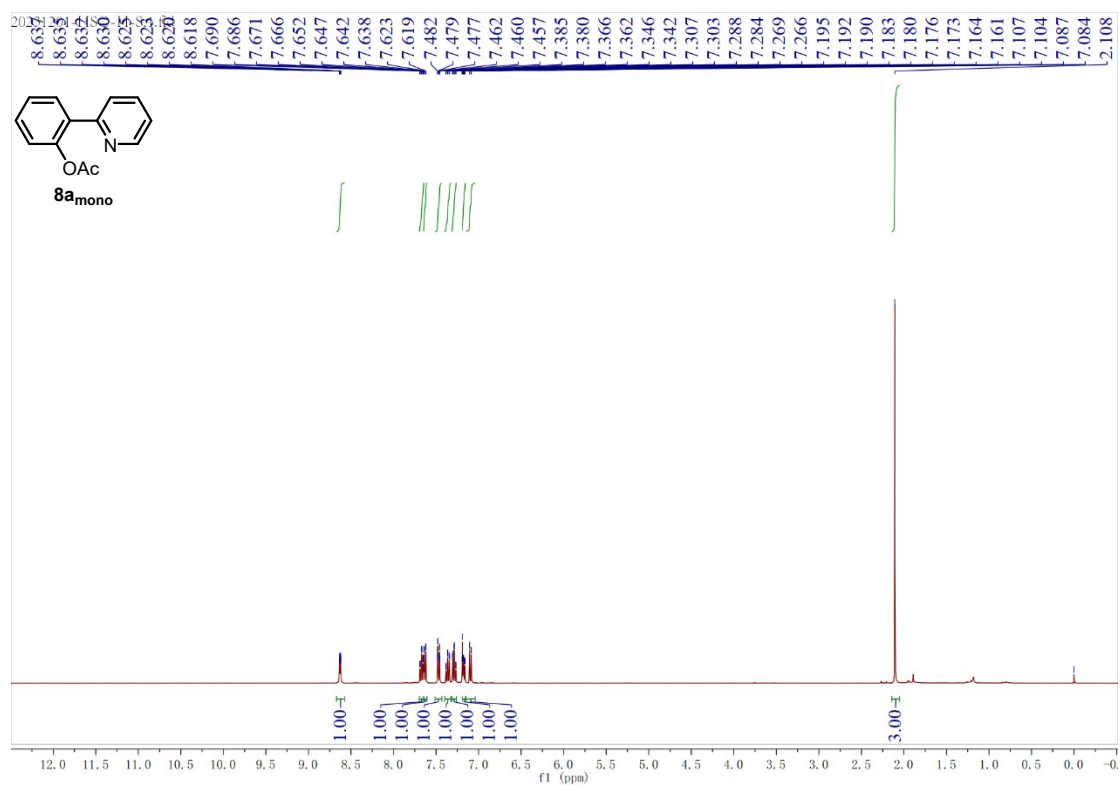

**<sup>13</sup>C NMR (100 MHz, CDCl<sub>3</sub>)**

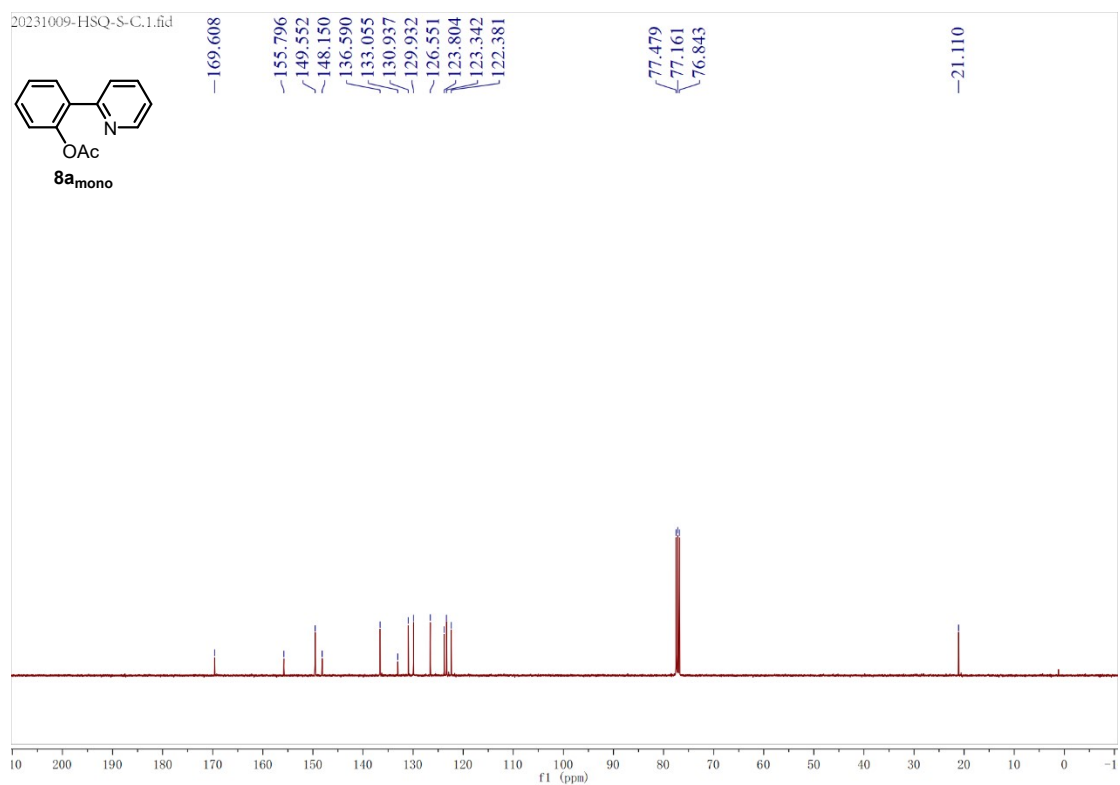

2-(pyridin-2-yl)-1,3-phenylene diacetate (**8a<sub>di</sub>**)

### $^1\text{H}$ NMR (400 MHz, $\text{CDCl}_3$ )

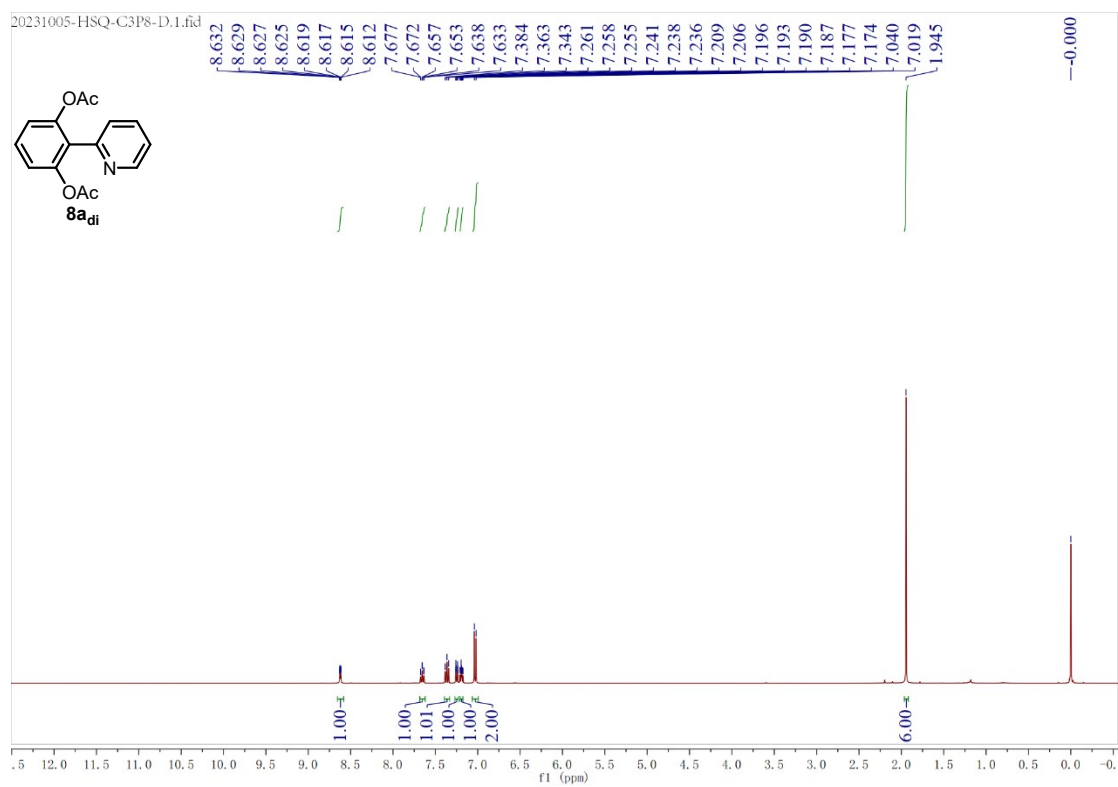

### $^{13}\text{C}$ NMR (100 MHz, $\text{CDCl}_3$ )

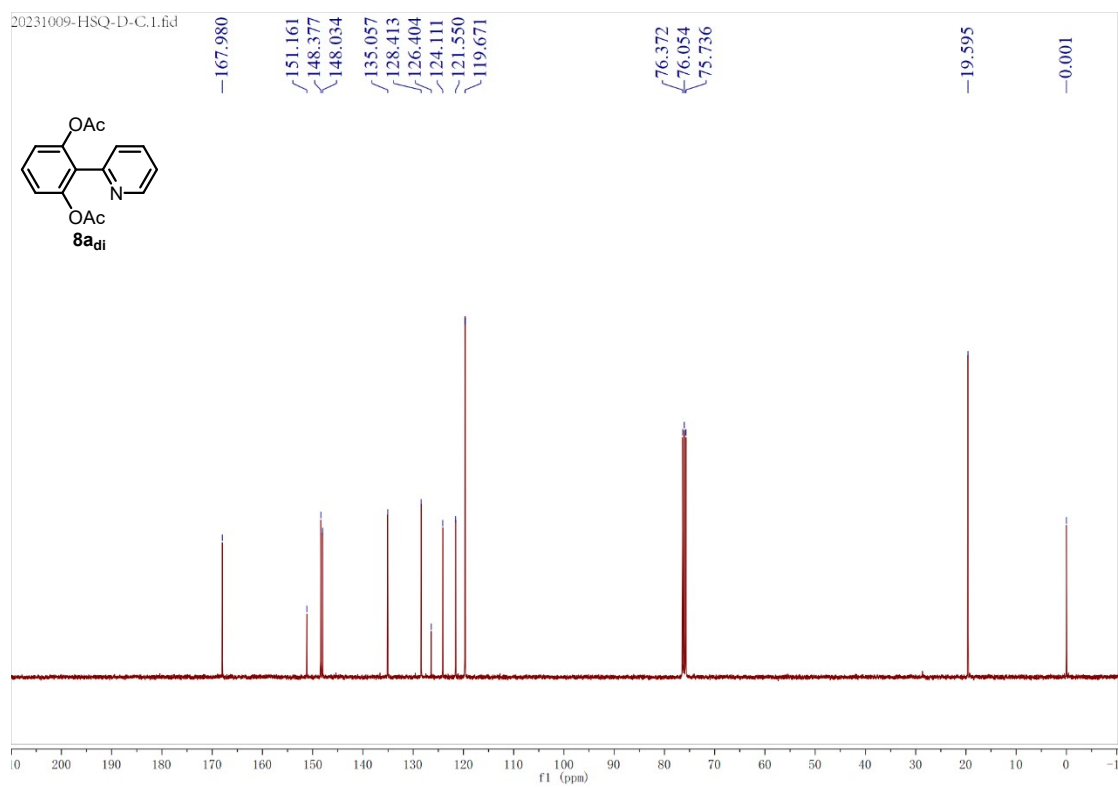

5-methyl-2-(pyridin-2-yl)phenyl acetate (**8b<sub>mono</sub>**)

### $^1\text{H}$ NMR (400 MHz, $\text{CDCl}_3$ )

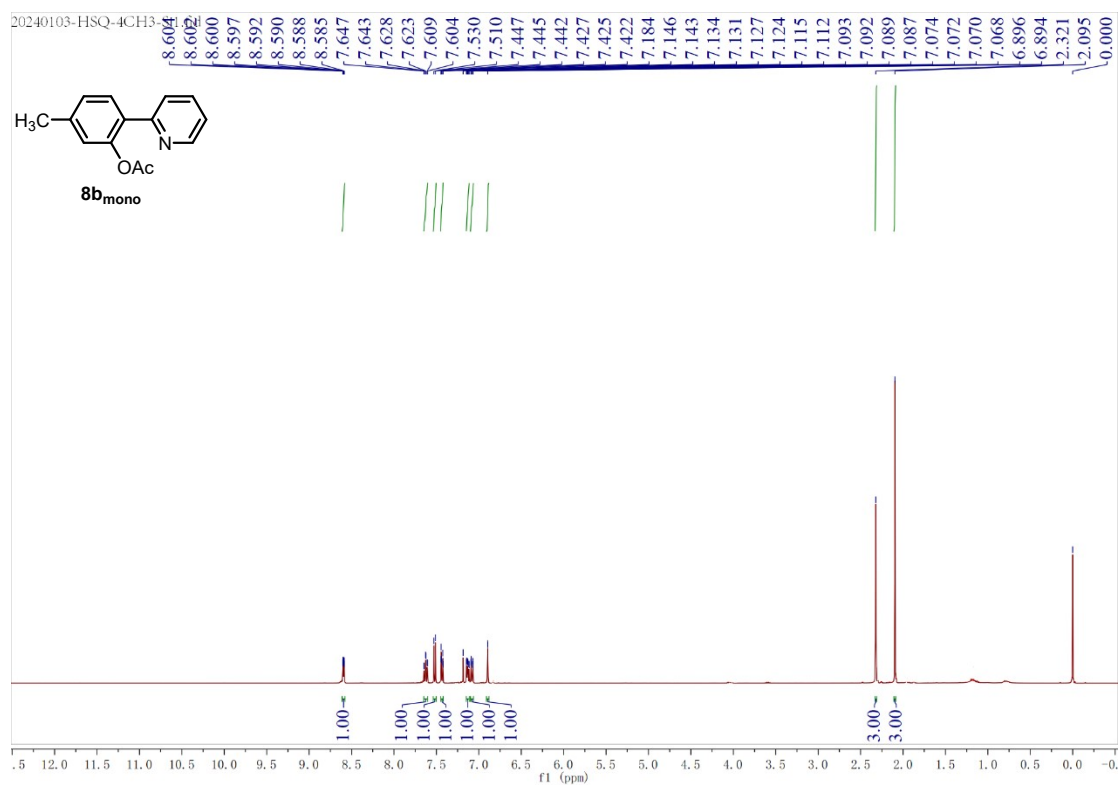

### $^{13}\text{C}$ NMR (100 MHz, $\text{CDCl}_3$ )

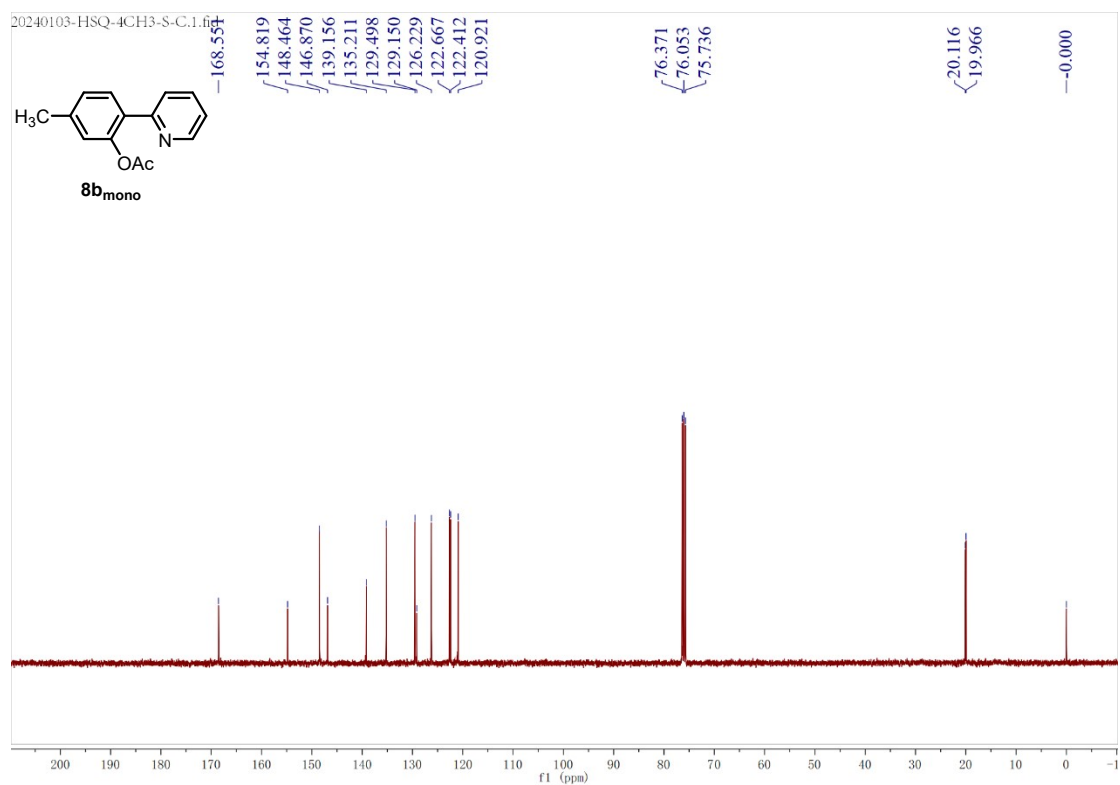

5-methyl-2-(pyridin-2-yl)-1,3-phenylene diacetate (**8b<sub>ai</sub>**)

### $^1\text{H}$ NMR (400 MHz, $\text{CDCl}_3$ )

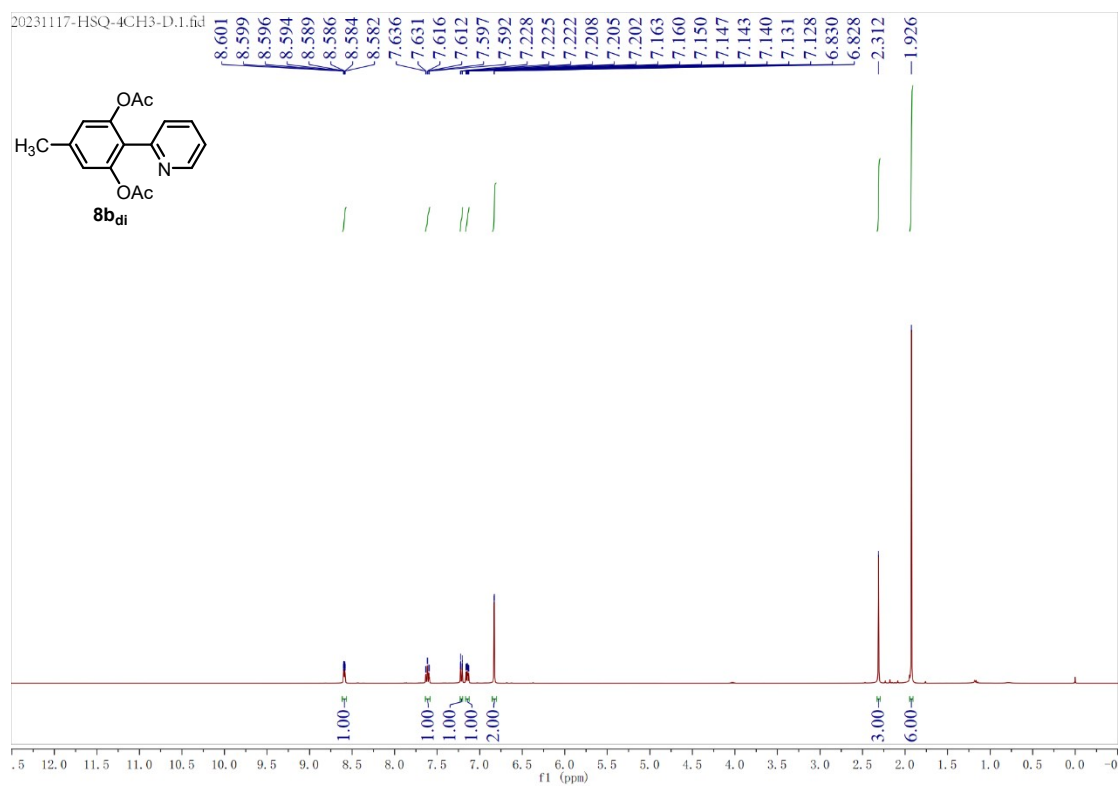

### $^{13}\text{C}$ NMR (100 MHz, $\text{CDCl}_3$ )

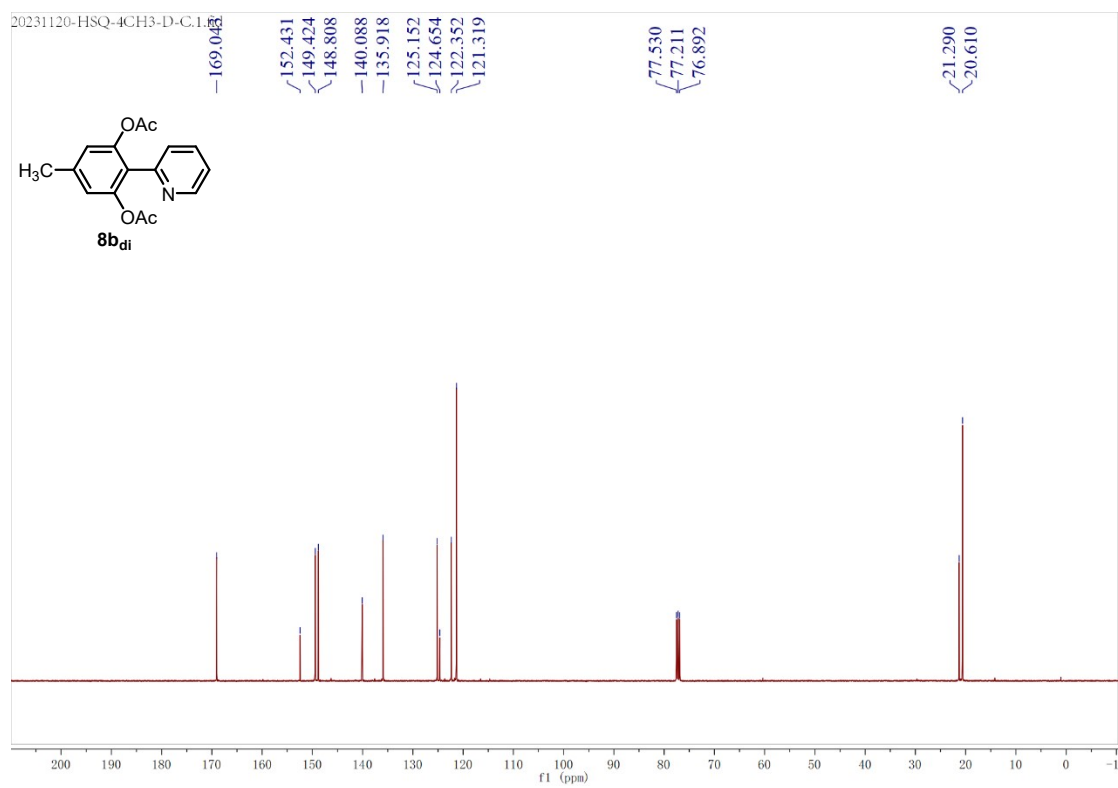

4-methyl-2-(pyridin-2-yl)phenyl acetate (**8c<sub>mono</sub>**)

### $^1\text{H}$ NMR (400 MHz, $\text{CDCl}_3$ )

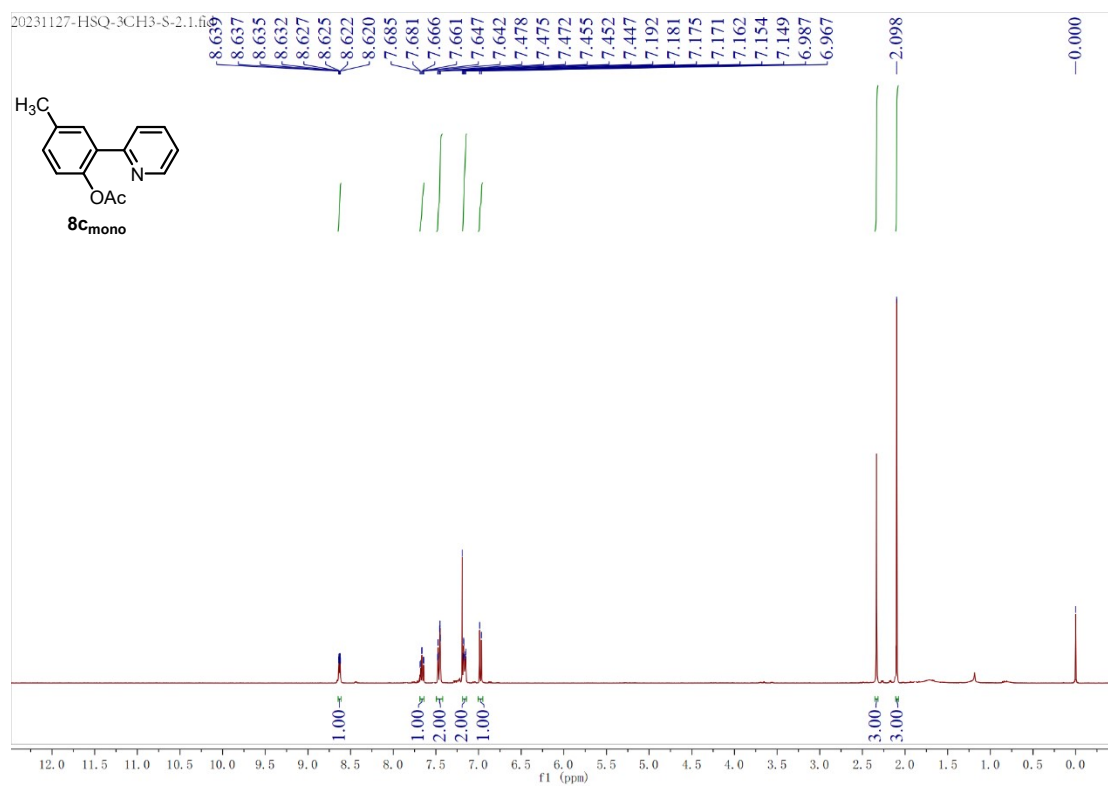

### $^{13}\text{C}$ NMR (100 MHz, $\text{CDCl}_3$ )

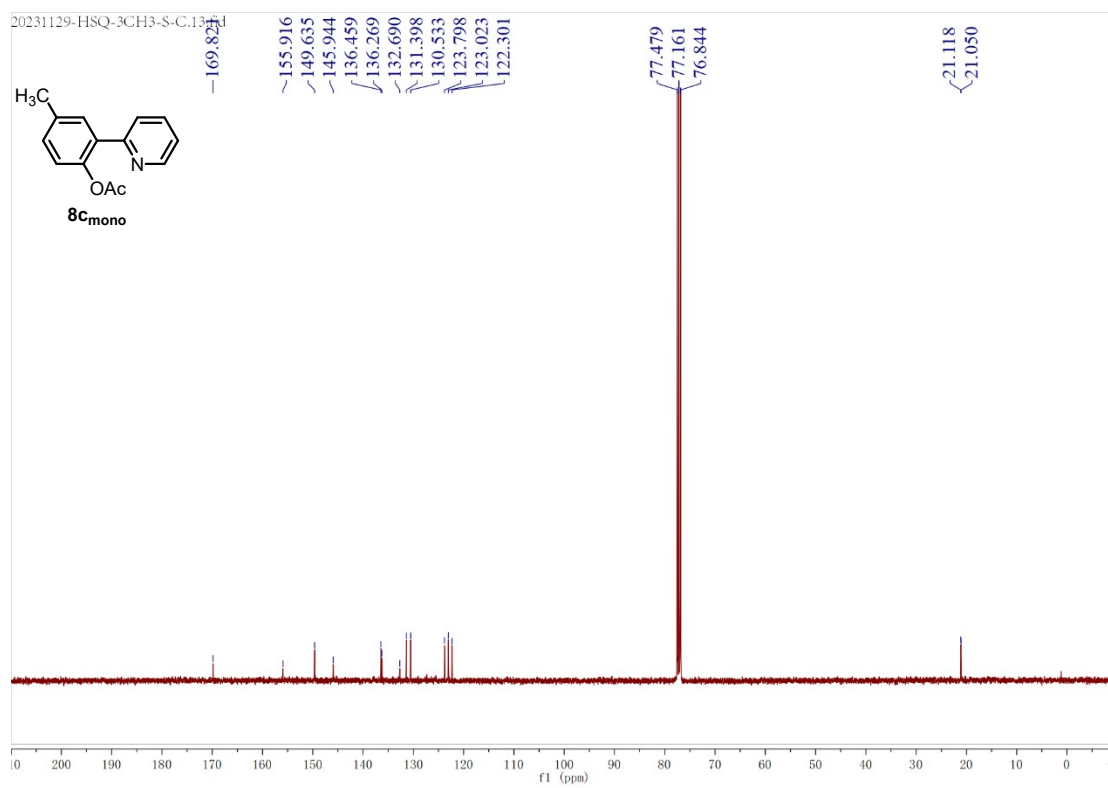

4-methyl-2-(pyridin-2-yl)-1,3-phenylene diacetate (**8c<sub>di</sub>**)



### $^1\text{H}$ NMR (400 MHz, $\text{CDCl}_3$ )

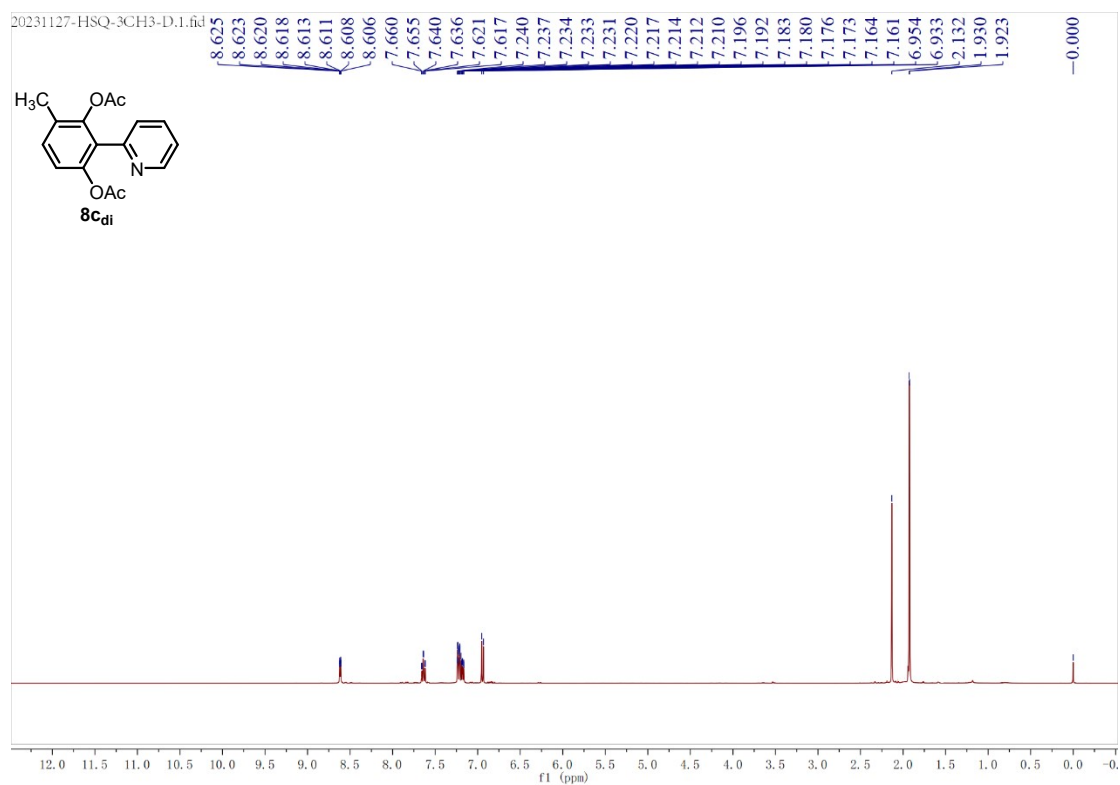

### $^{13}\text{C}$ NMR (100 MHz, $\text{CDCl}_3$ )

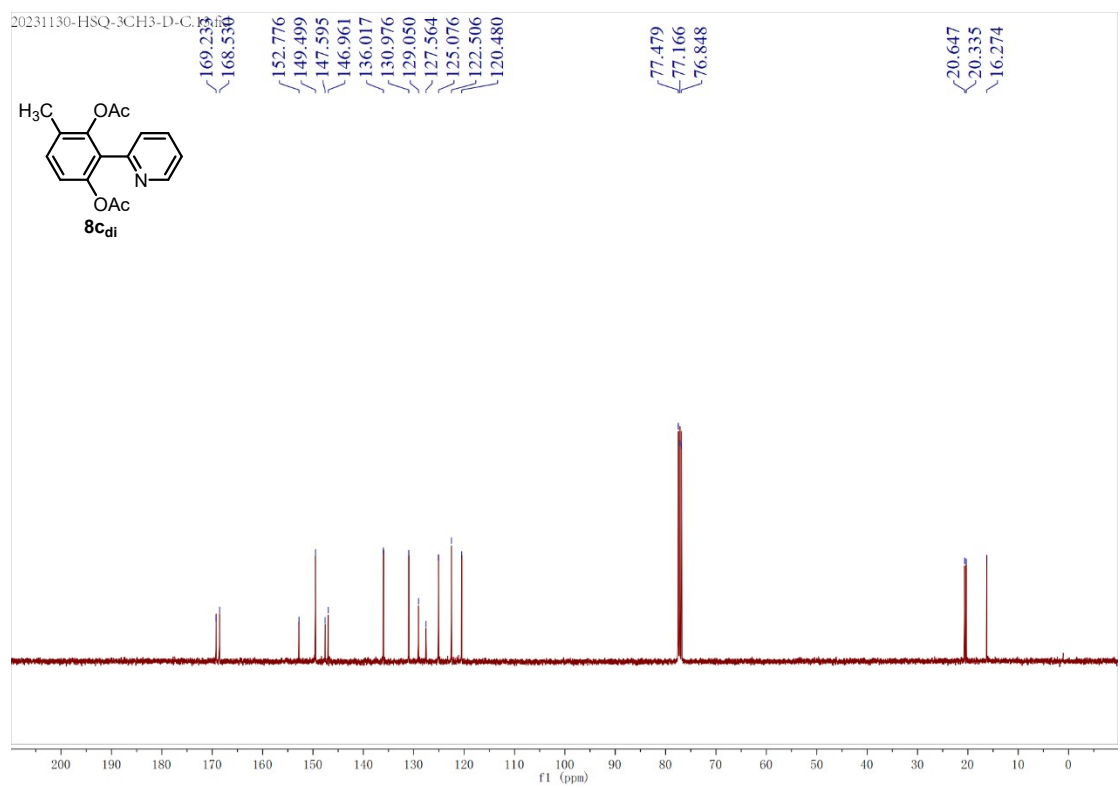

3-methyl-2-(pyridin-2-yl)phenyl acetate (**8d<sub>mono</sub>**)

### $^1\text{H}$ NMR (400 MHz, $\text{CDCl}_3$ )

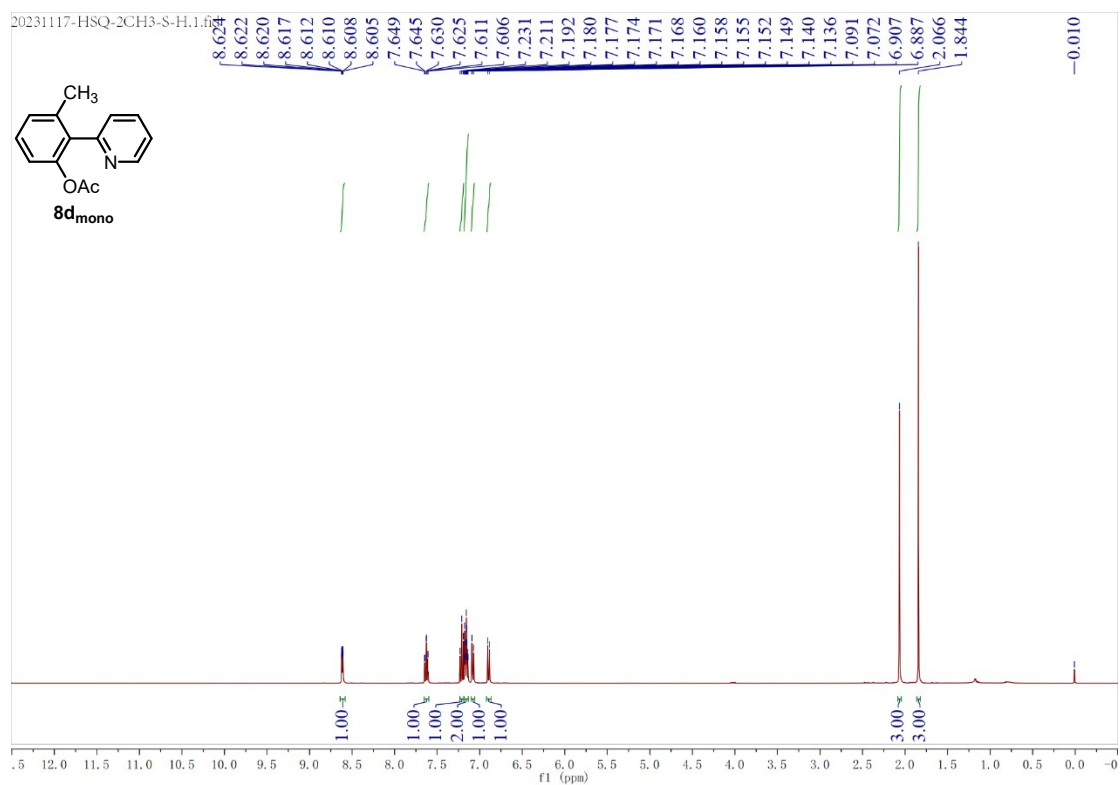

### $^{13}\text{C}$ NMR (100 MHz, $\text{CDCl}_3$ )

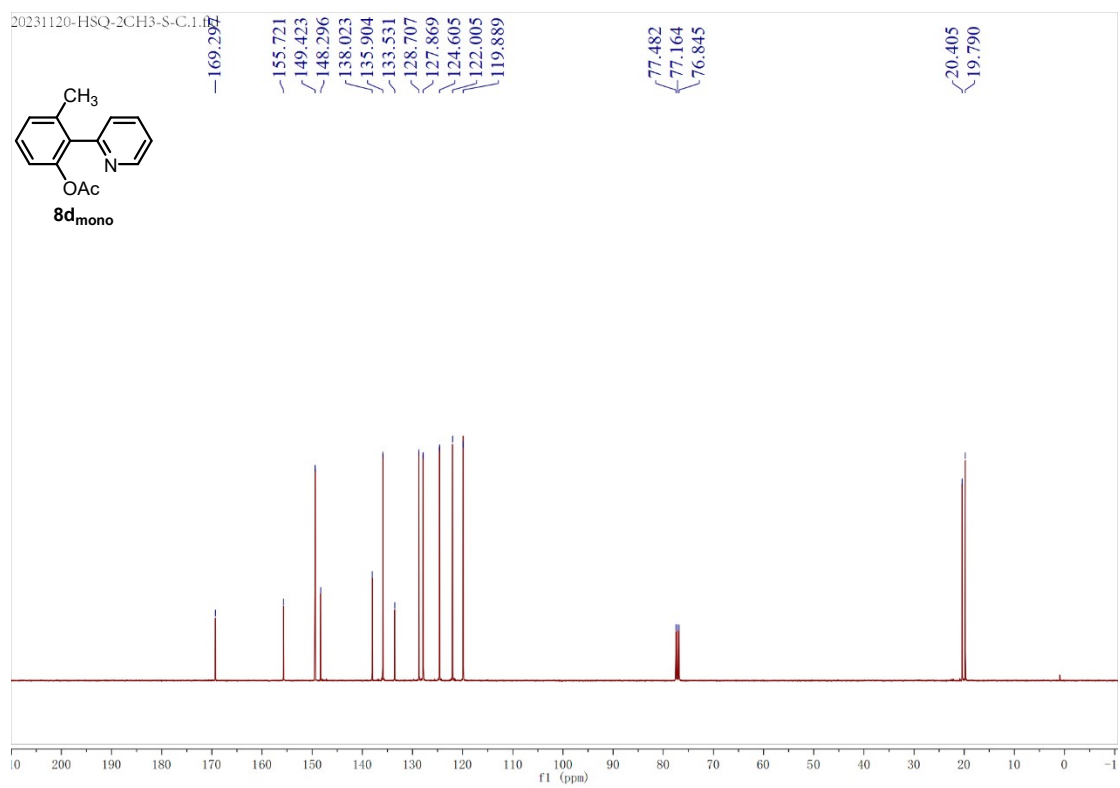

5-methoxy-2-(pyridin-2-yl)phenyl acetate (**8e<sub>mono</sub>**)

S50

**<sup>1</sup>H NMR (400 MHz, CDCl<sub>3</sub>)**

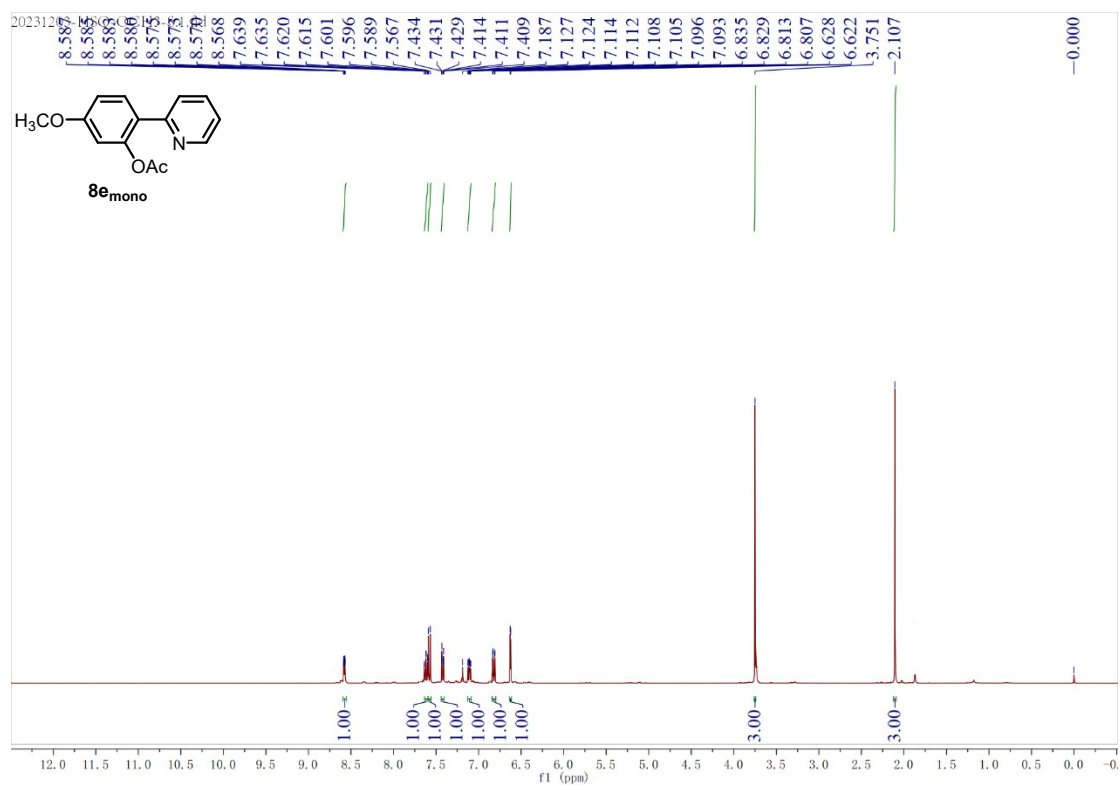

**<sup>13</sup>C NMR (100 MHz, CDCl<sub>3</sub>)**

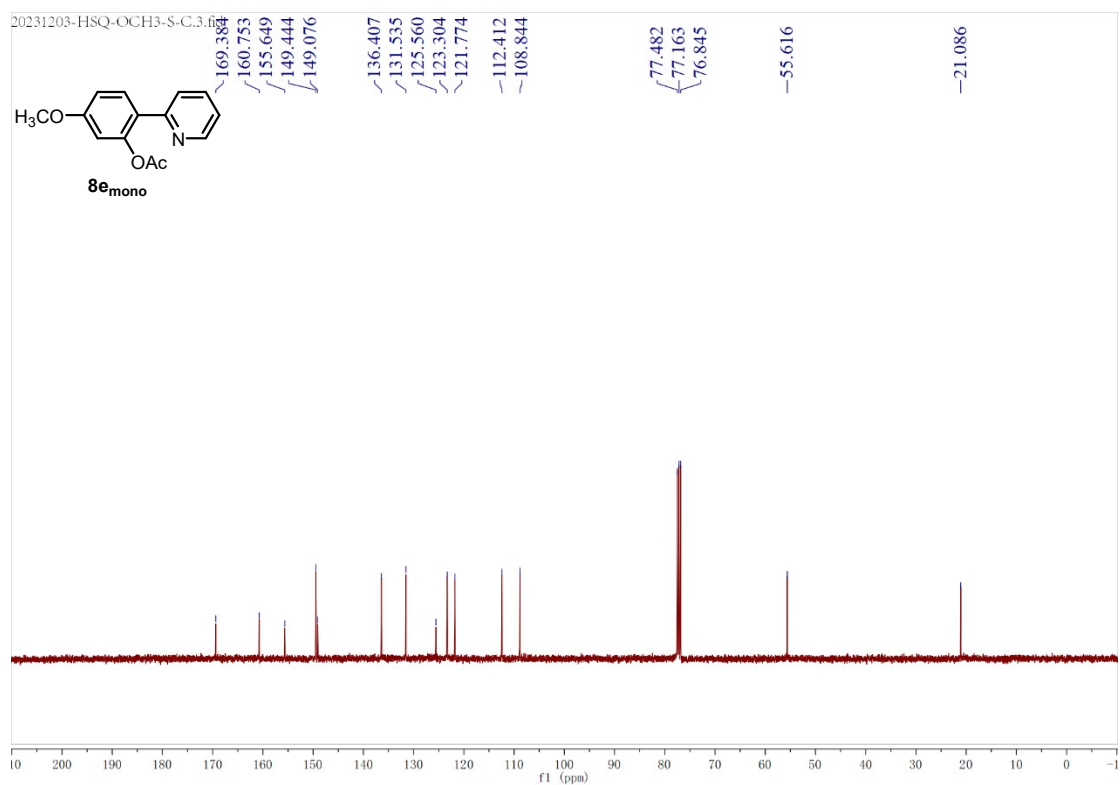

5-methoxy-2-(pyridin-2-yl)-1,3-phenylene diacetate (**8e<sub>di</sub>**)

### $^1\text{H}$ NMR (400 MHz, $\text{CDCl}_3$ )

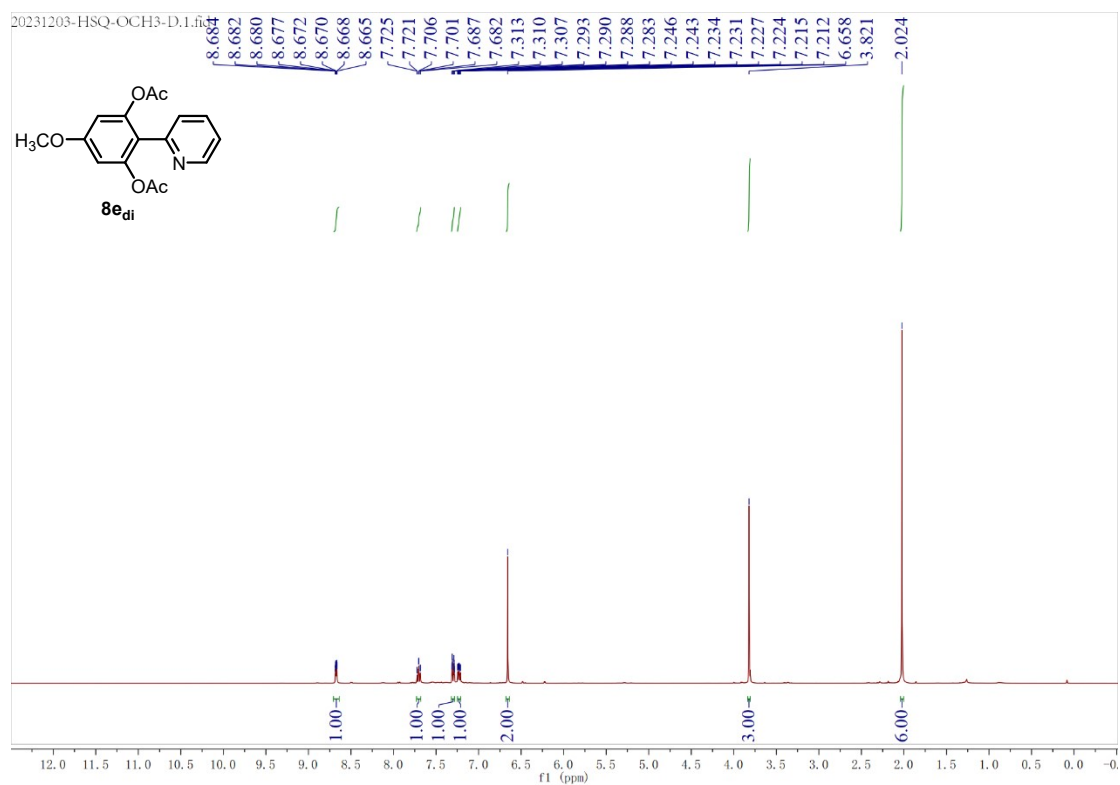

### $^{13}\text{C}$ NMR (100 MHz, $\text{CDCl}_3$ )

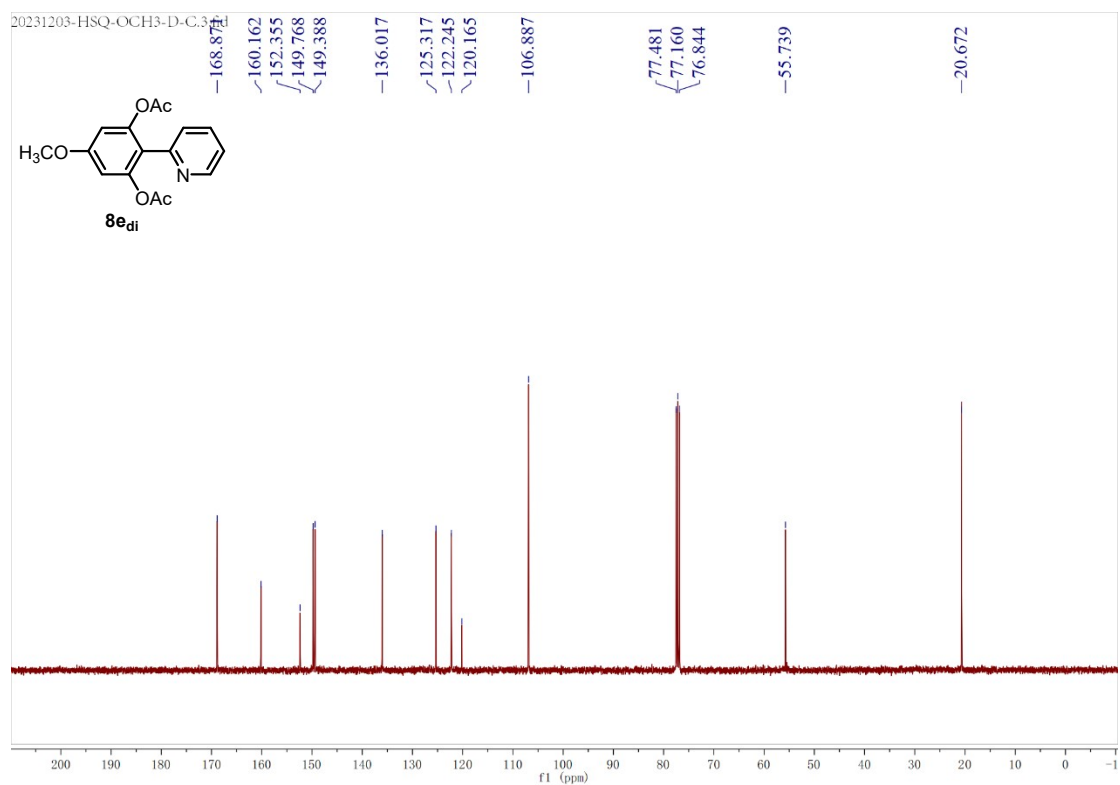

4-chloro-2-(pyridin-2-yl)phenyl acetate (**8f<sub>mono</sub>**)

### $^1\text{H}$ NMR (400 MHz, $\text{CDCl}_3$ )

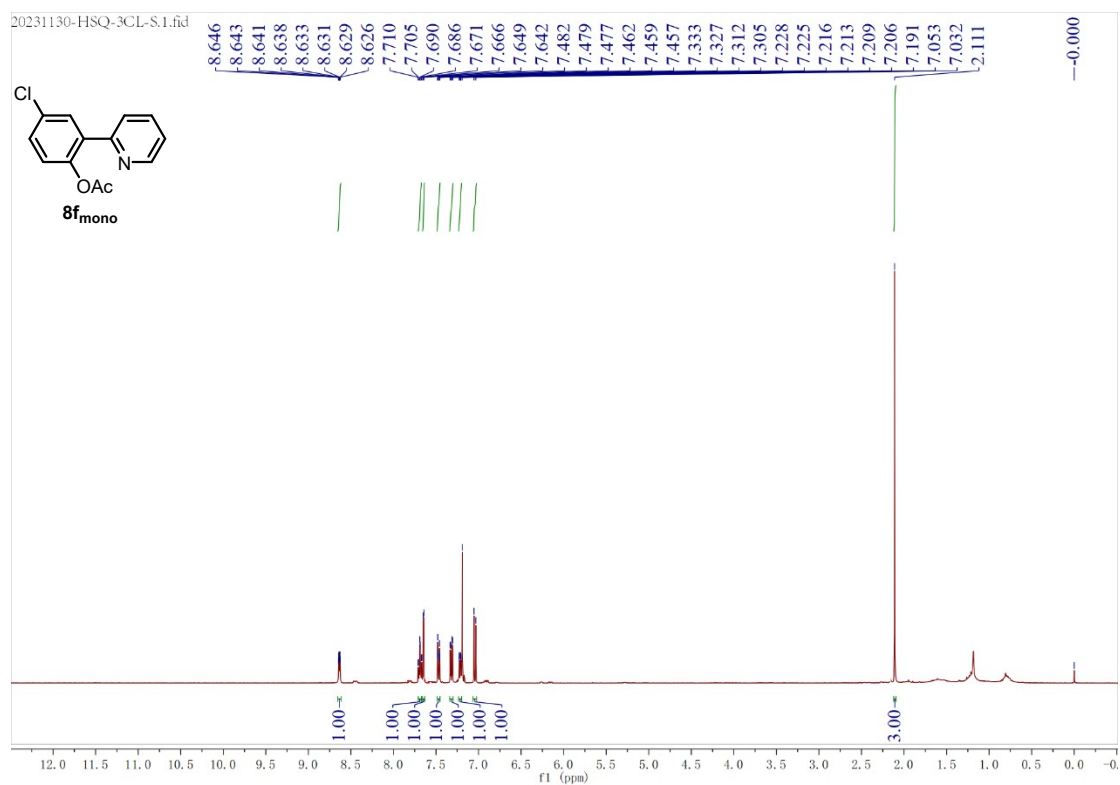

### $^{13}\text{C}$ NMR (100 MHz, $\text{CDCl}_3$ )

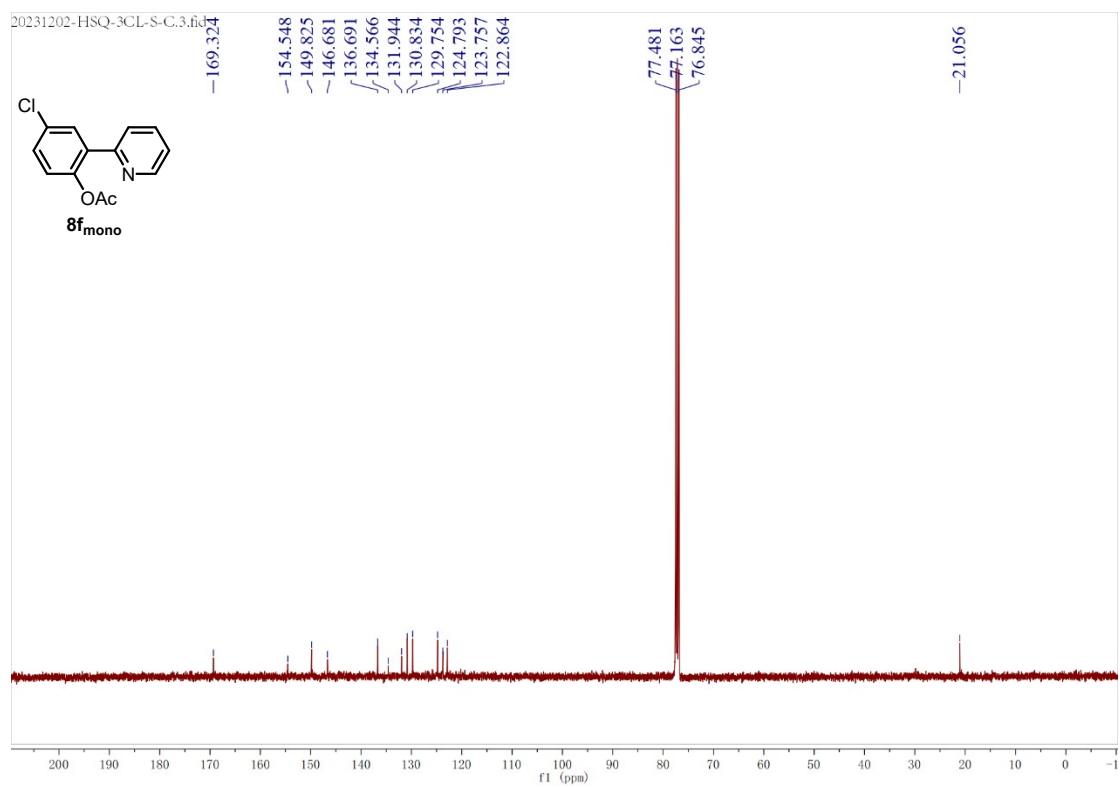

4-chloro-2-(pyridin-2-yl)-1,3-phenylene diacetate (**8f<sub>di</sub>**)

### <sup>1</sup>H NMR (400 MHz, CDCl<sub>3</sub>)

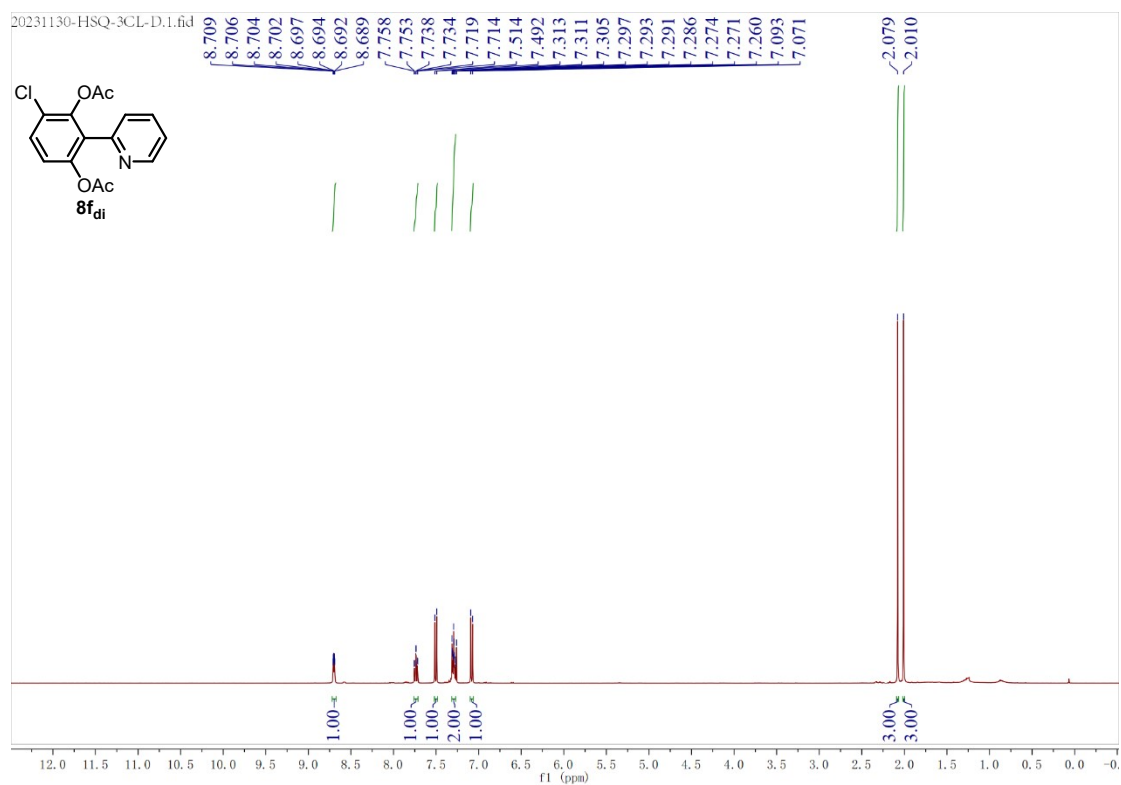

### <sup>13</sup>C NMR (100 MHz, CDCl<sub>3</sub>)

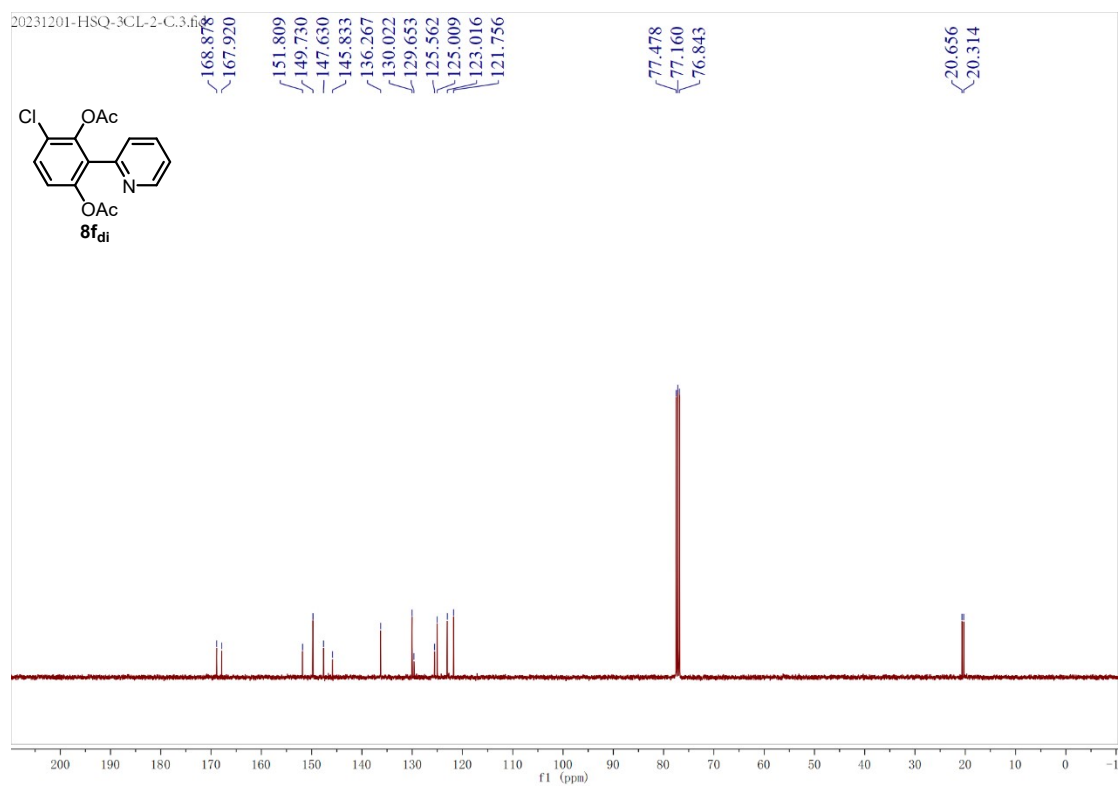

5-chloro-2-(pyridin-2-yl)phenol (**8<sub>gmono</sub>**)

### <sup>1</sup>H NMR (400 MHz, CDCl<sub>3</sub>)

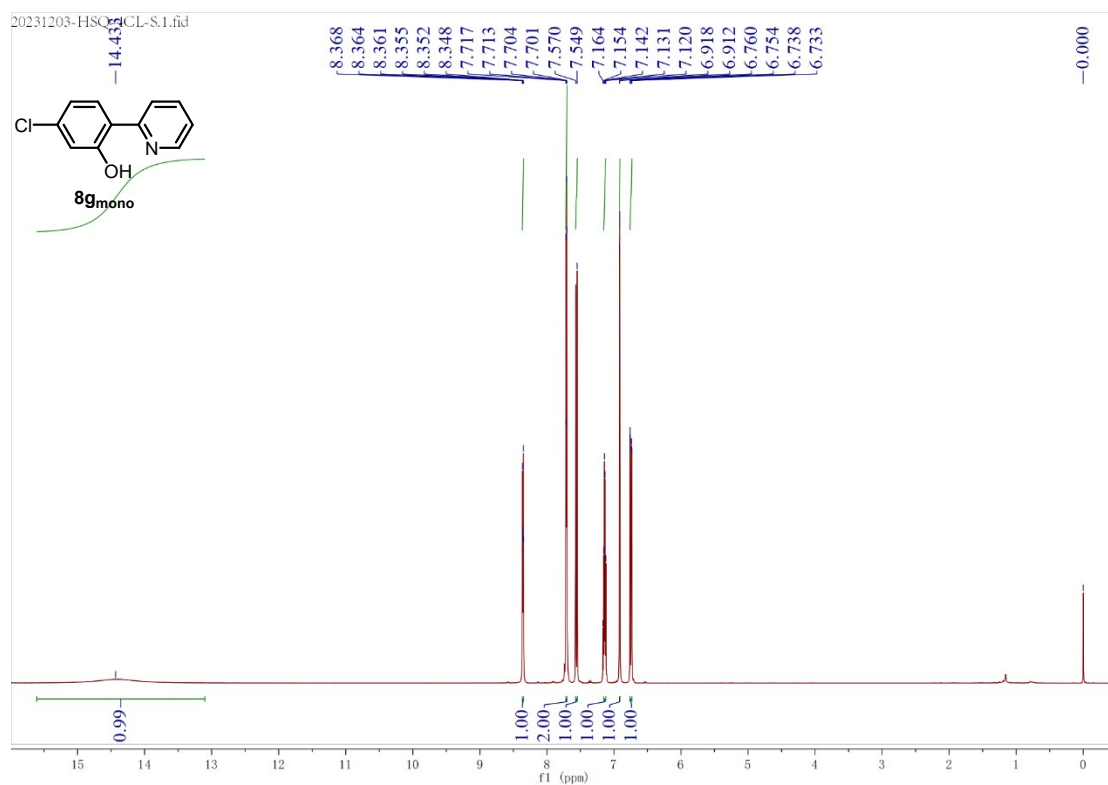

### <sup>13</sup>C NMR (100 MHz, CDCl<sub>3</sub>)

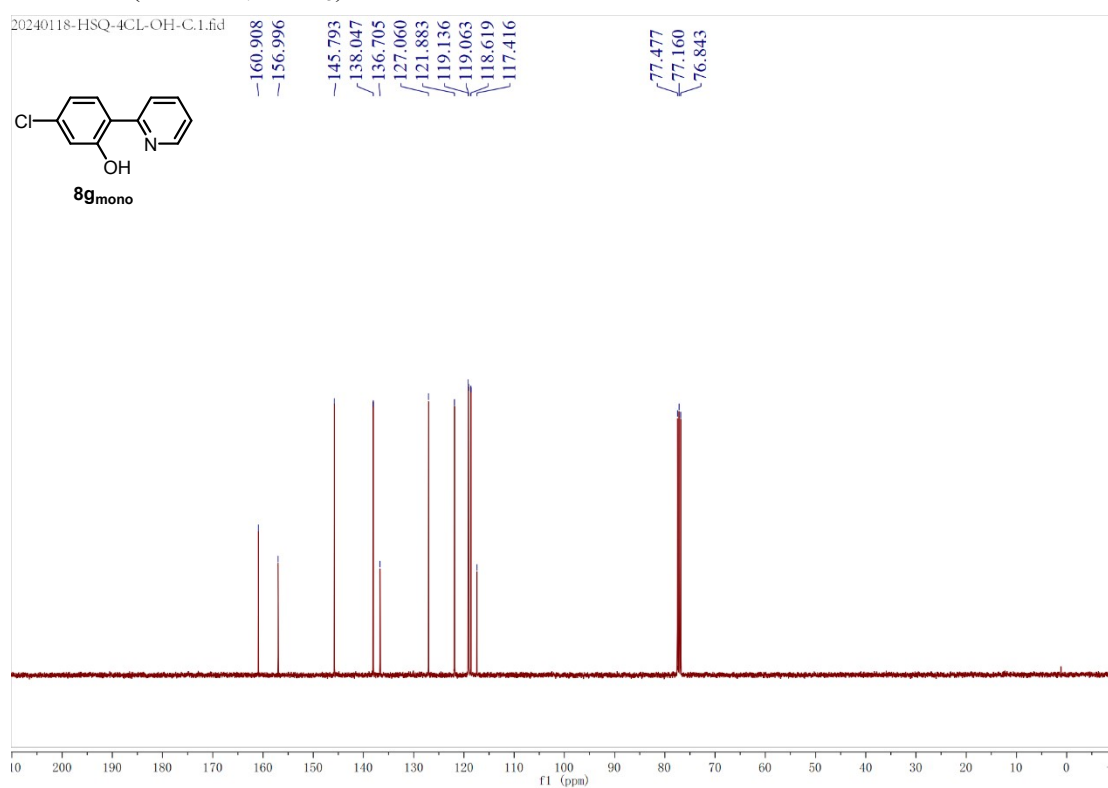

5-chloro-2-(pyridin-2-yl)-1,3-phenylene diacetate (**8g<sub>di</sub>**)

S55

**<sup>1</sup>H NMR (400 MHz, CDCl<sub>3</sub>)**

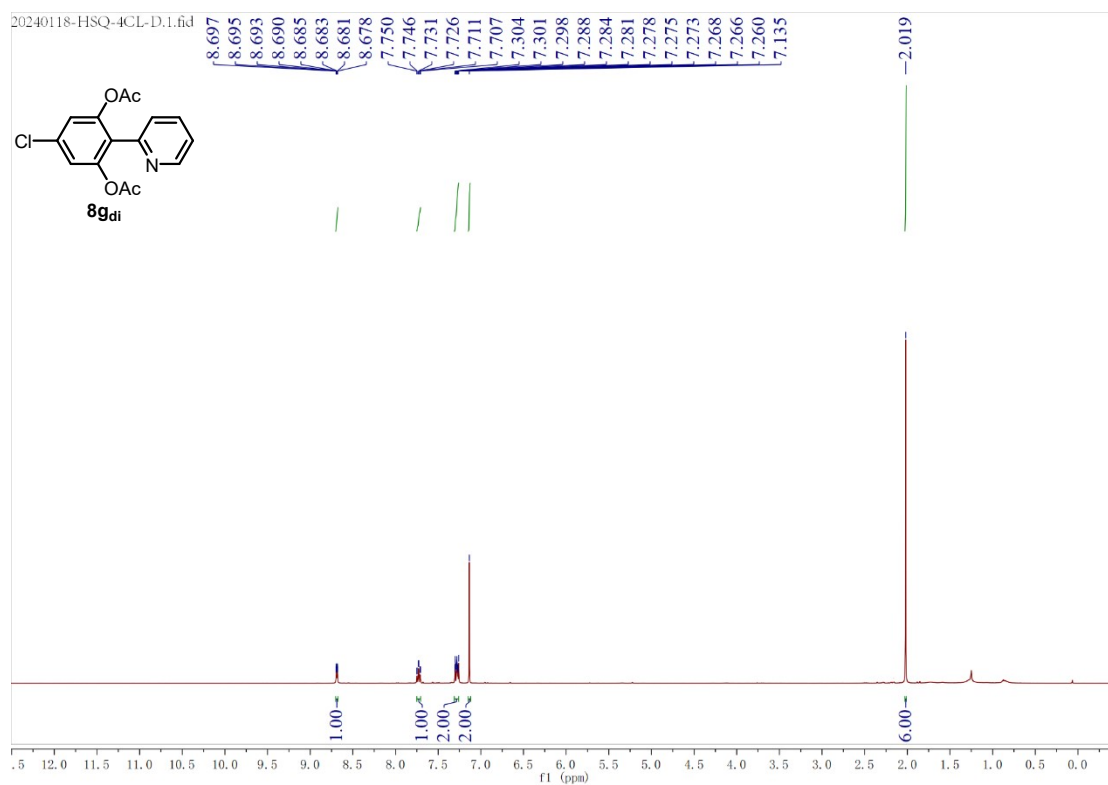

**<sup>13</sup>C NMR (100 MHz, CDCl<sub>3</sub>)**

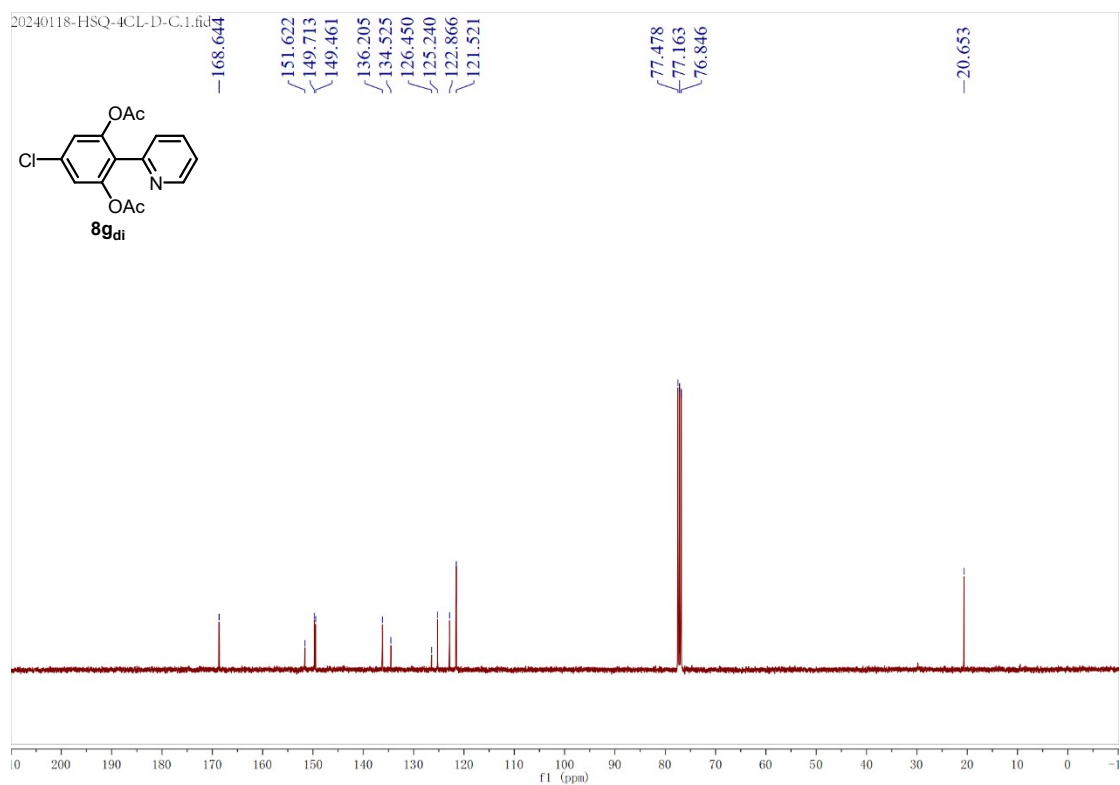

3-chloro-2-(pyridin-2-yl)phenyl acetate (**8h<sub>mono</sub>**)



### $^1\text{H}$ NMR (400 MHz, $\text{CDCl}_3$ )

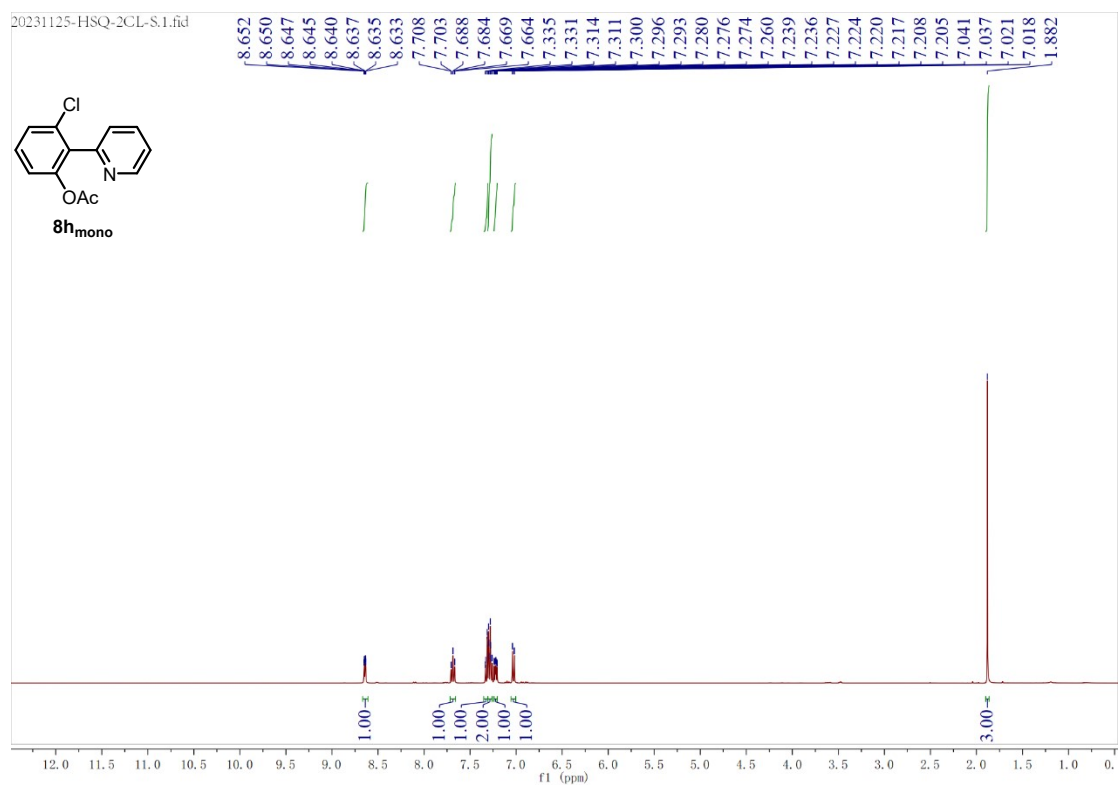

### $^{13}\text{C}$ NMR (100 MHz, $\text{CDCl}_3$ )

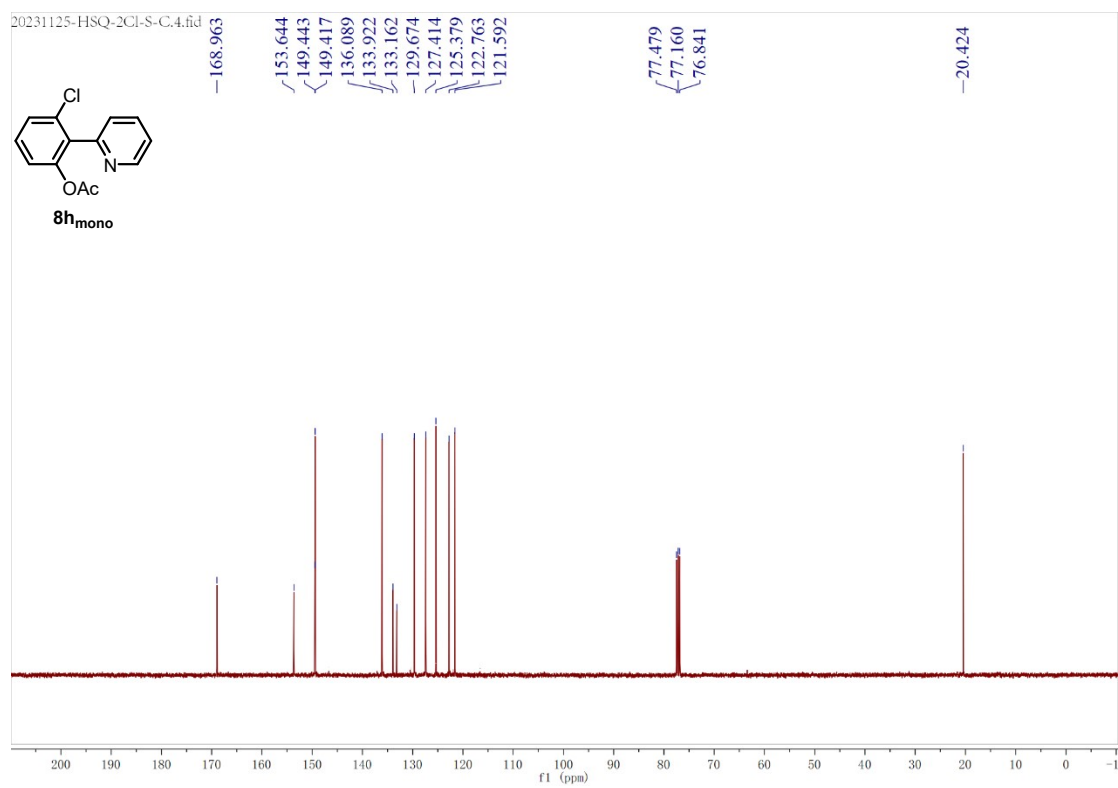

5-fluoro-2-(pyridin-2-yl)phenyl acetate (**8i<sub>mono</sub>**)

### $^1\text{H}$ NMR (400 MHz, $\text{CDCl}_3$ )

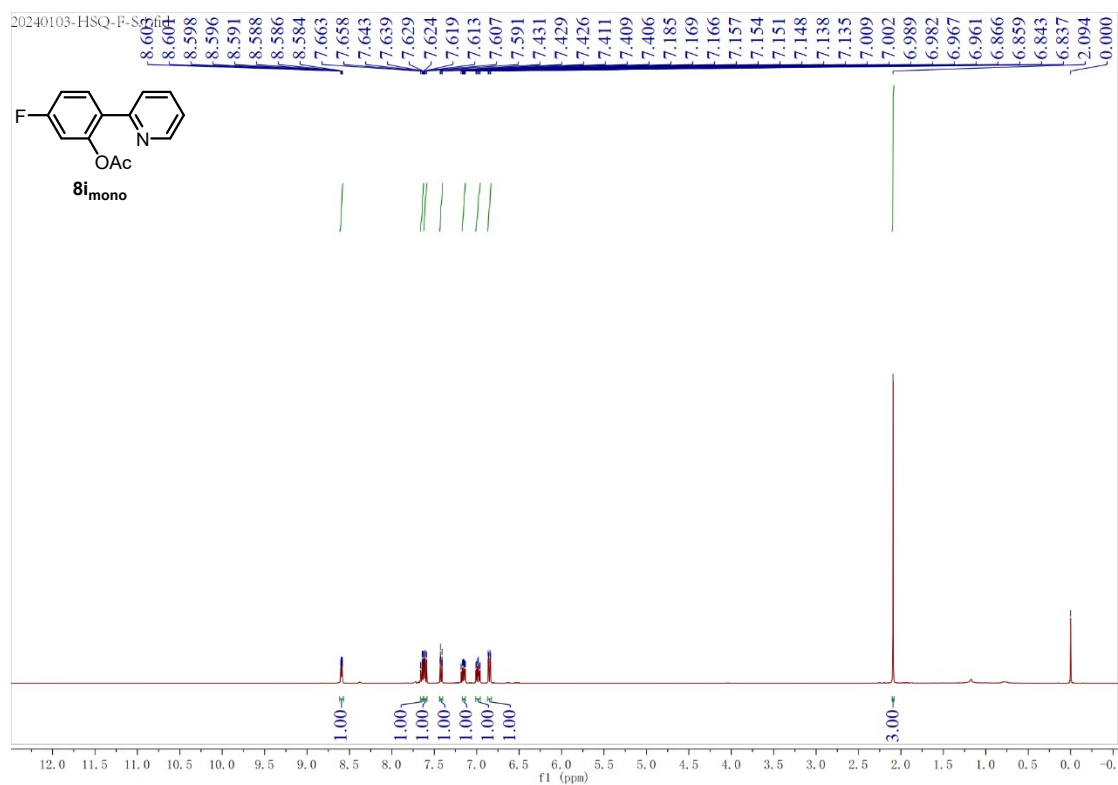

### $^{13}\text{C}$ NMR (100 MHz, $\text{CDCl}_3$ )

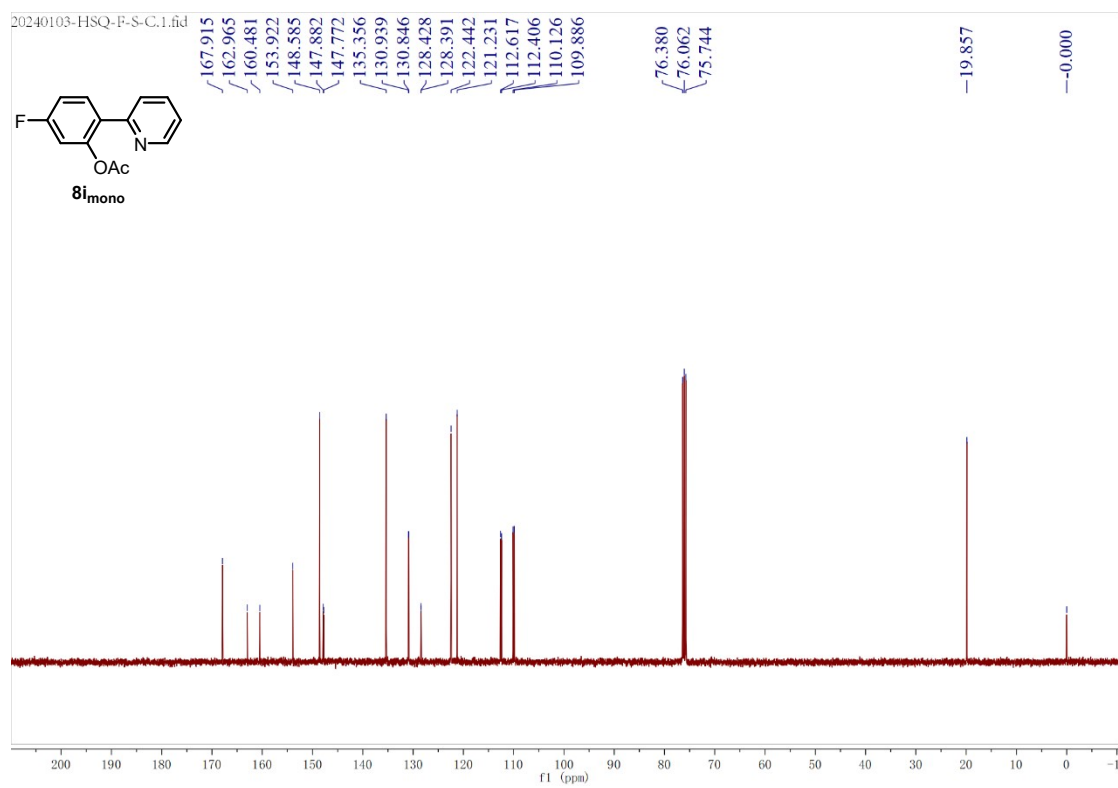

5-fluoro-2-(pyridin-2-yl)-1,3-phenylene diacetate (**8i<sub>di</sub>**)

S58

### <sup>1</sup>H NMR (400 MHz, CDCl<sub>3</sub>)

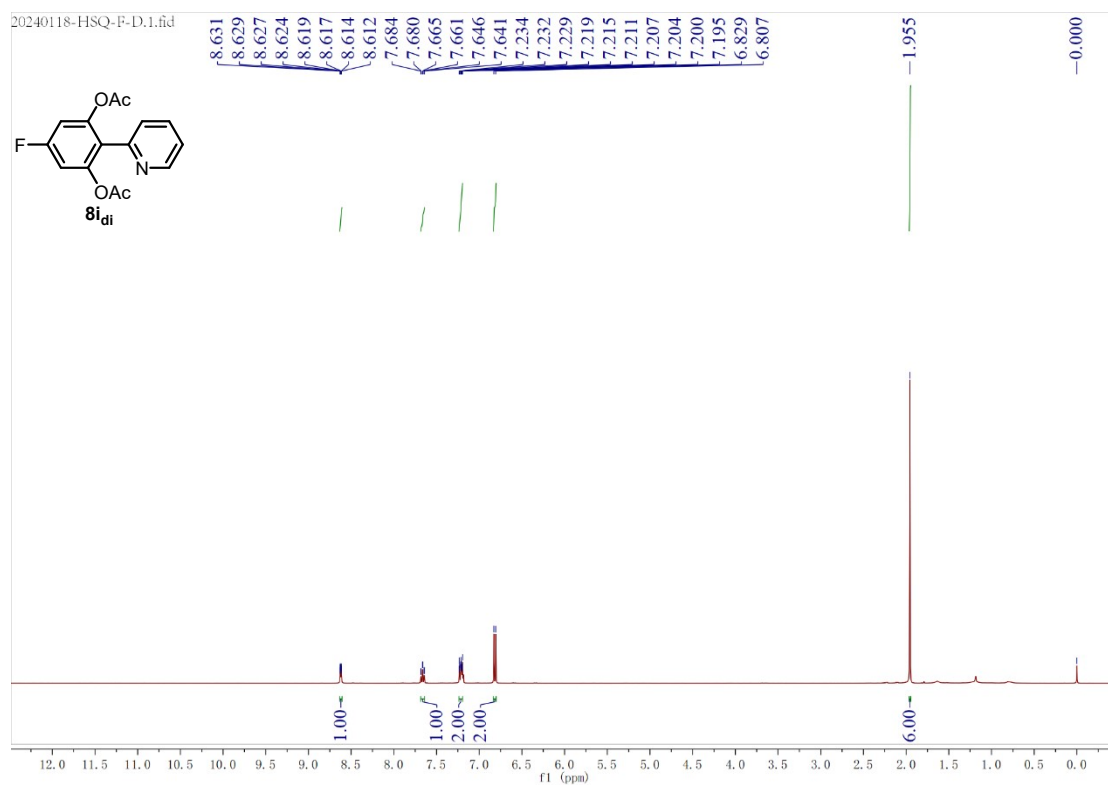

### <sup>13</sup>C NMR (100 MHz, CDCl<sub>3</sub>)

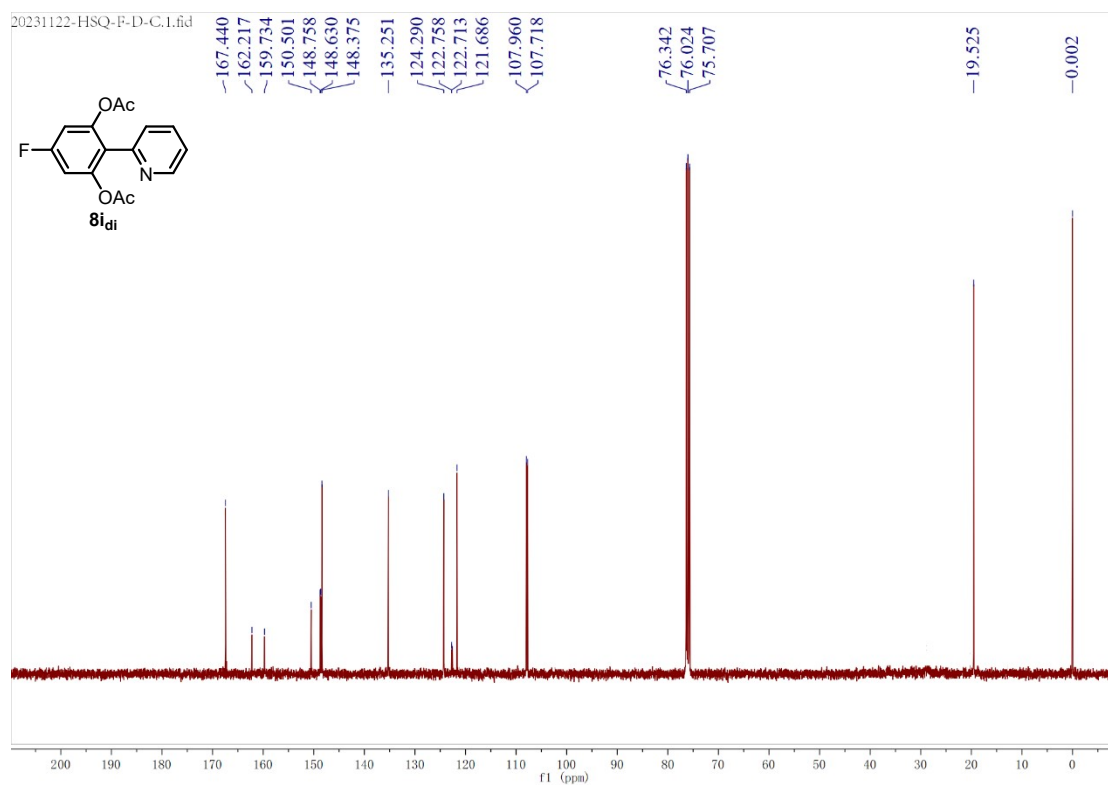

2-(pyridin-2-yl)-5-(trifluoromethyl)phenyl acetate (**8j<sub>mono</sub>**)

S59

### $^1\text{H}$ NMR (400 MHz, $\text{CDCl}_3$ )

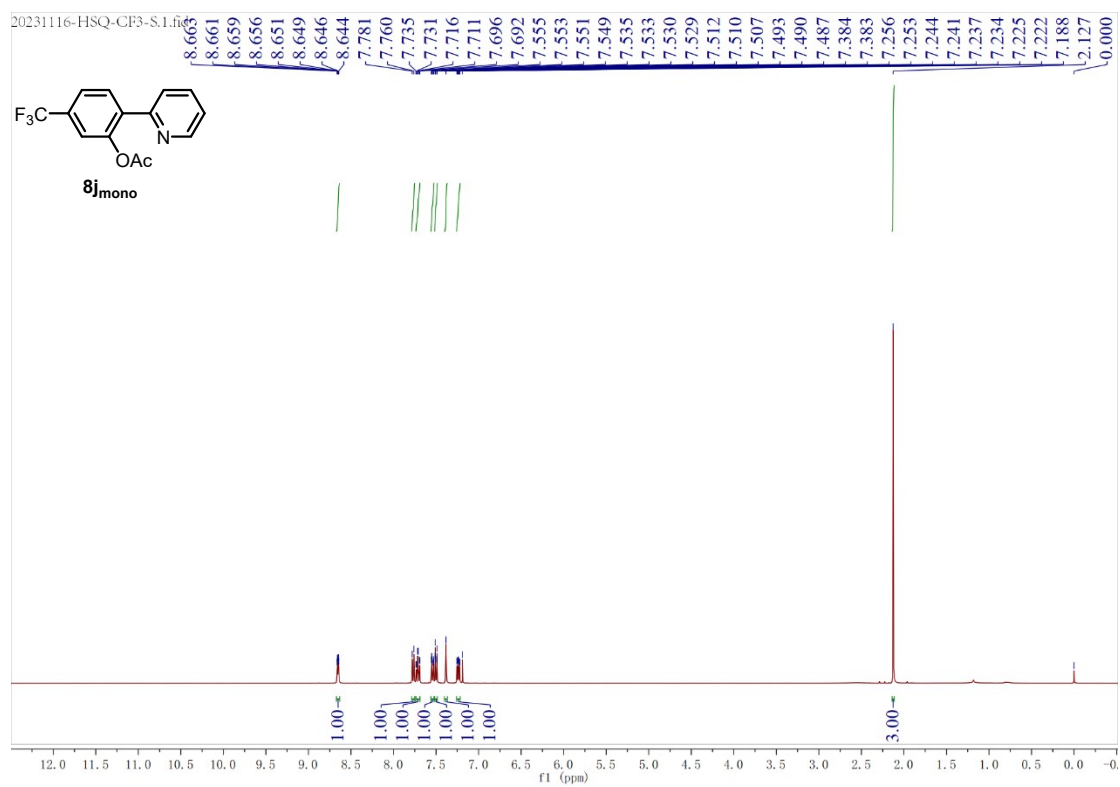

### $^{13}\text{C}$ NMR (100 MHz, $\text{CDCl}_3$ )

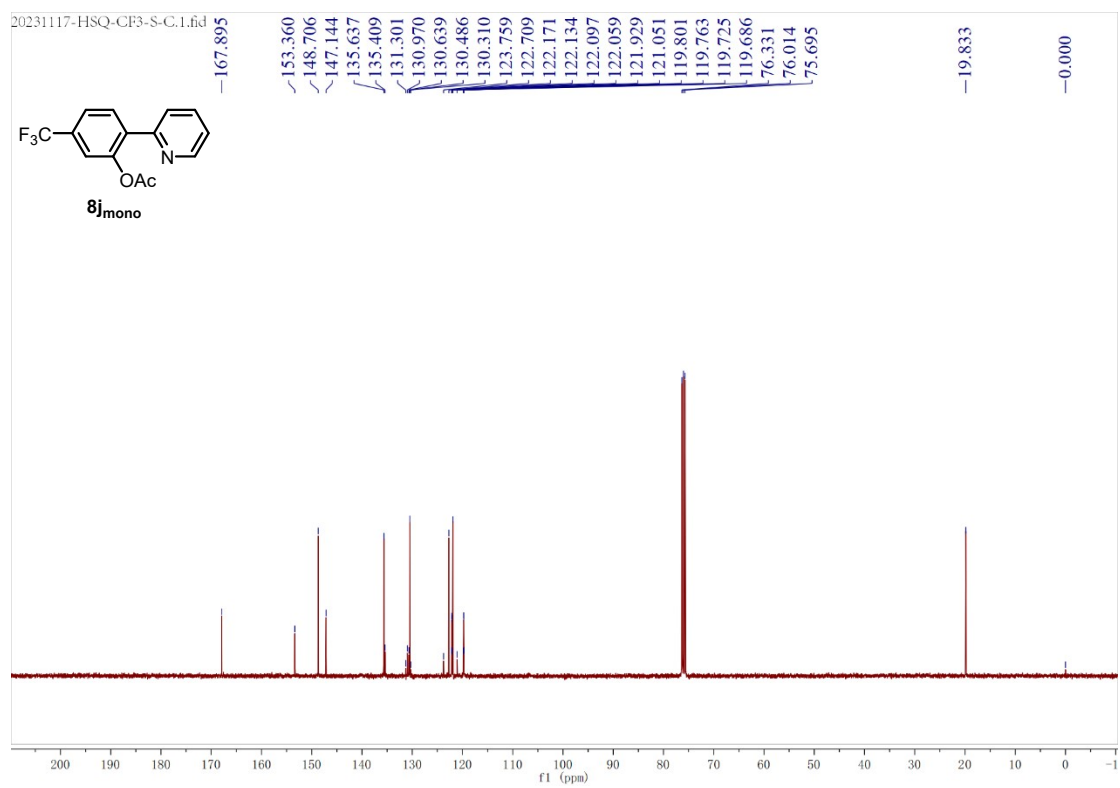

2-(pyridin-2-yl)-5-(trifluoromethyl)-1,3-phenylene diacetate (**8j<sub>di</sub>**)

### <sup>1</sup>H NMR (400 MHz, CDCl<sub>3</sub>)

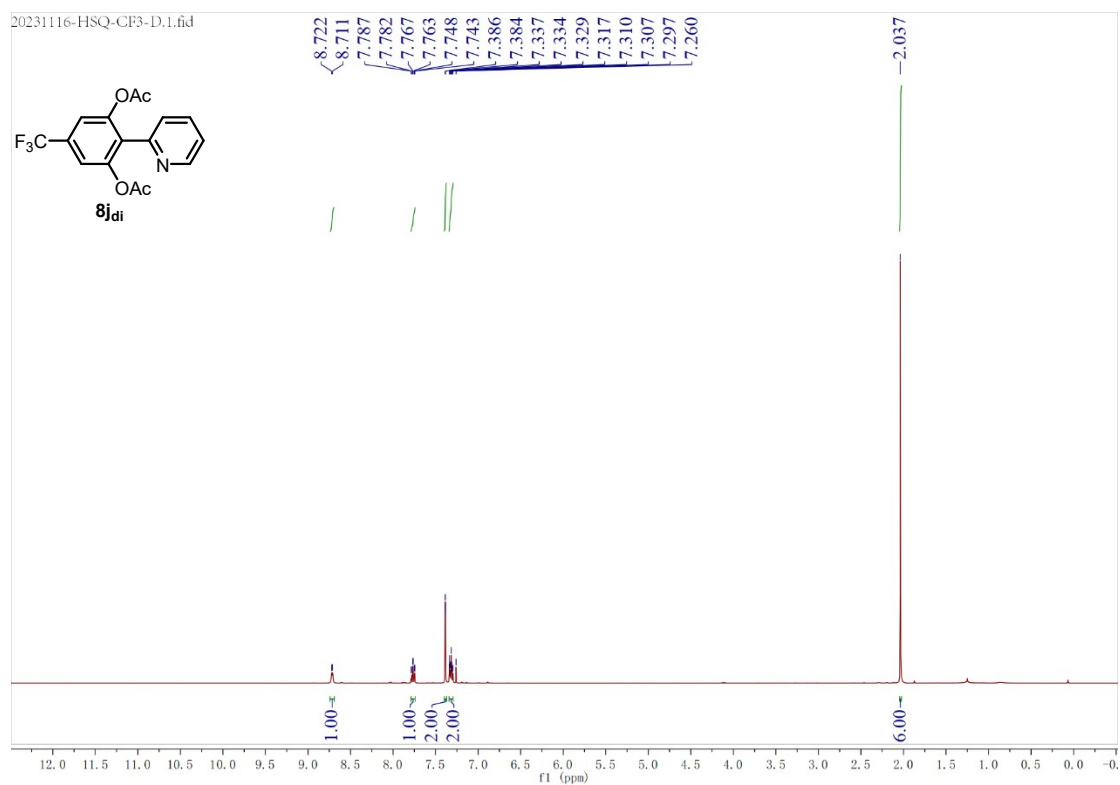

### <sup>13</sup>C NMR (100 MHz, CDCl<sub>3</sub>)

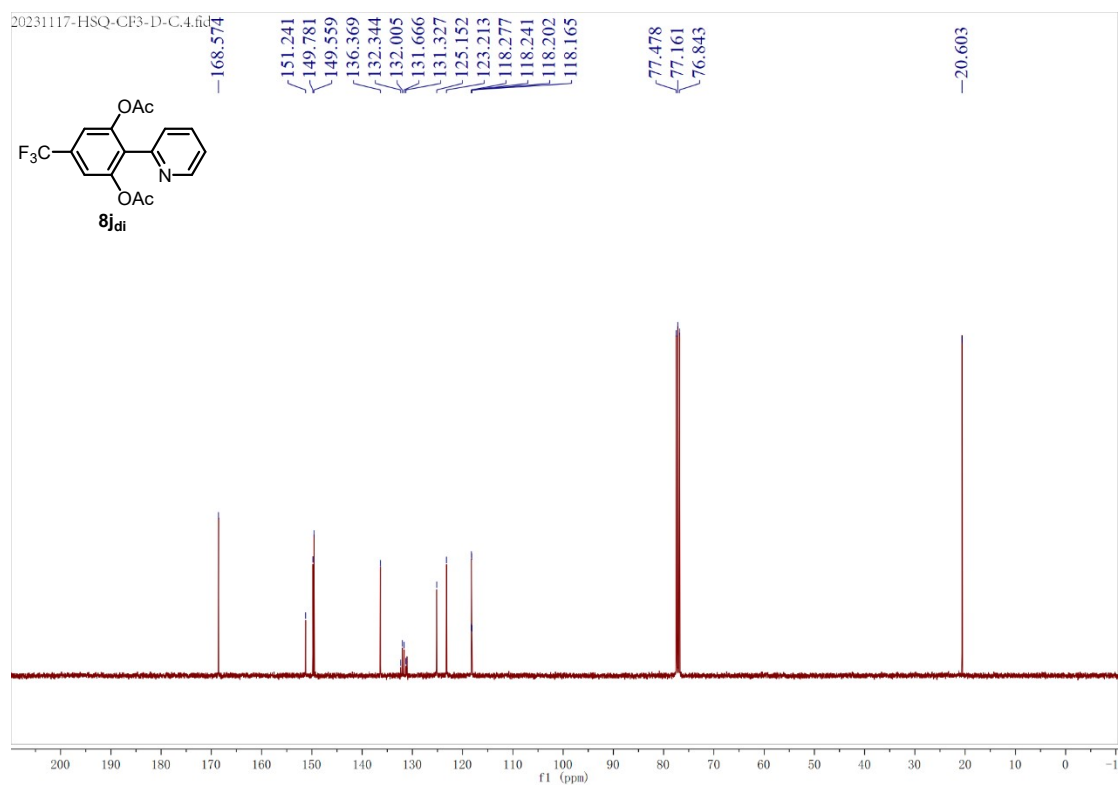

4,5-dimethyl-2-(pyridin-2-yl)phenyl acetate (**8k<sub>mono</sub>**)

### $^1\text{H}$ NMR (400 MHz, $\text{CDCl}_3$ )

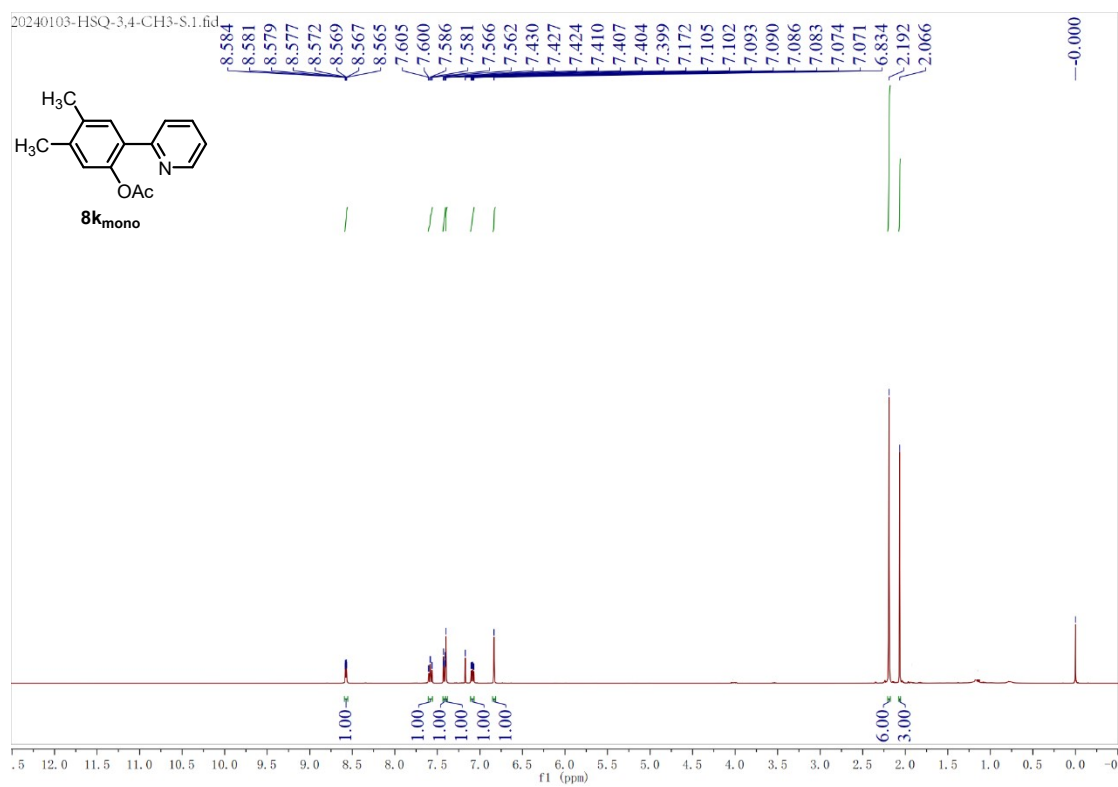

### $^{13}\text{C}$ NMR (100 MHz, $\text{CDCl}_3$ )

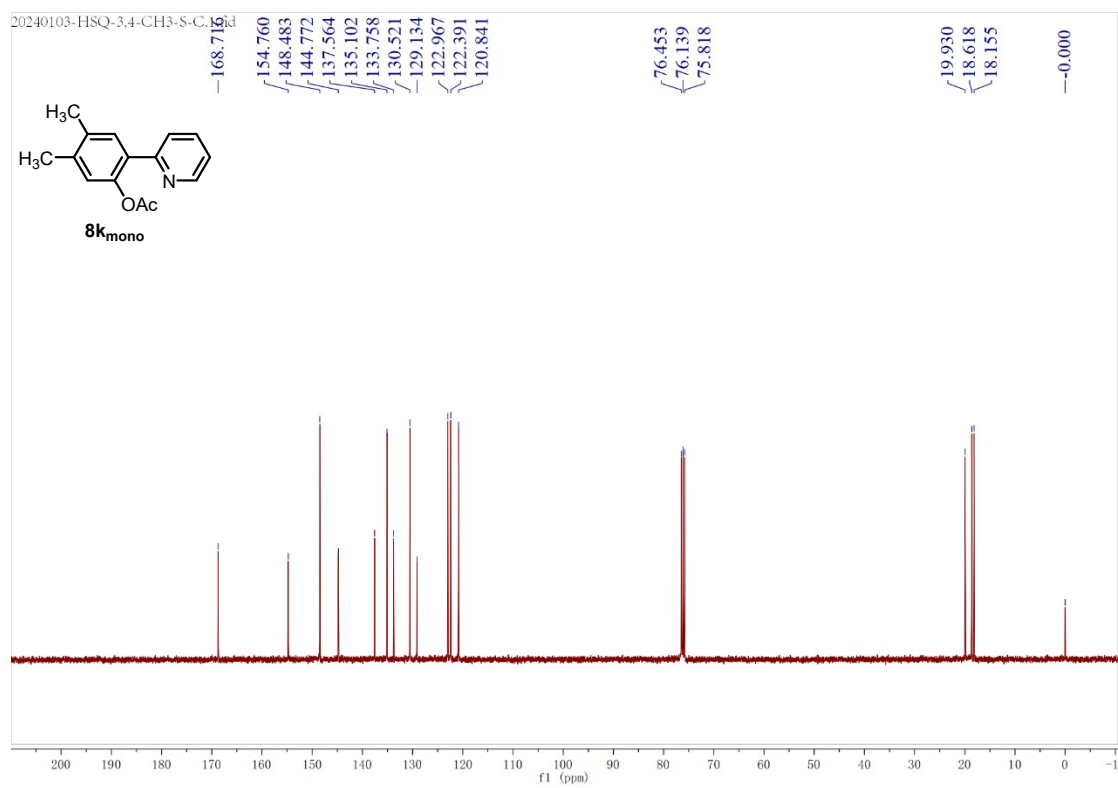

4,5-dimethyl-2-(pyridin-2-yl)-1,3-phenylene diacetate (**8k<sub>di</sub>**)

### <sup>1</sup>H NMR (400 MHz, CDCl<sub>3</sub>)

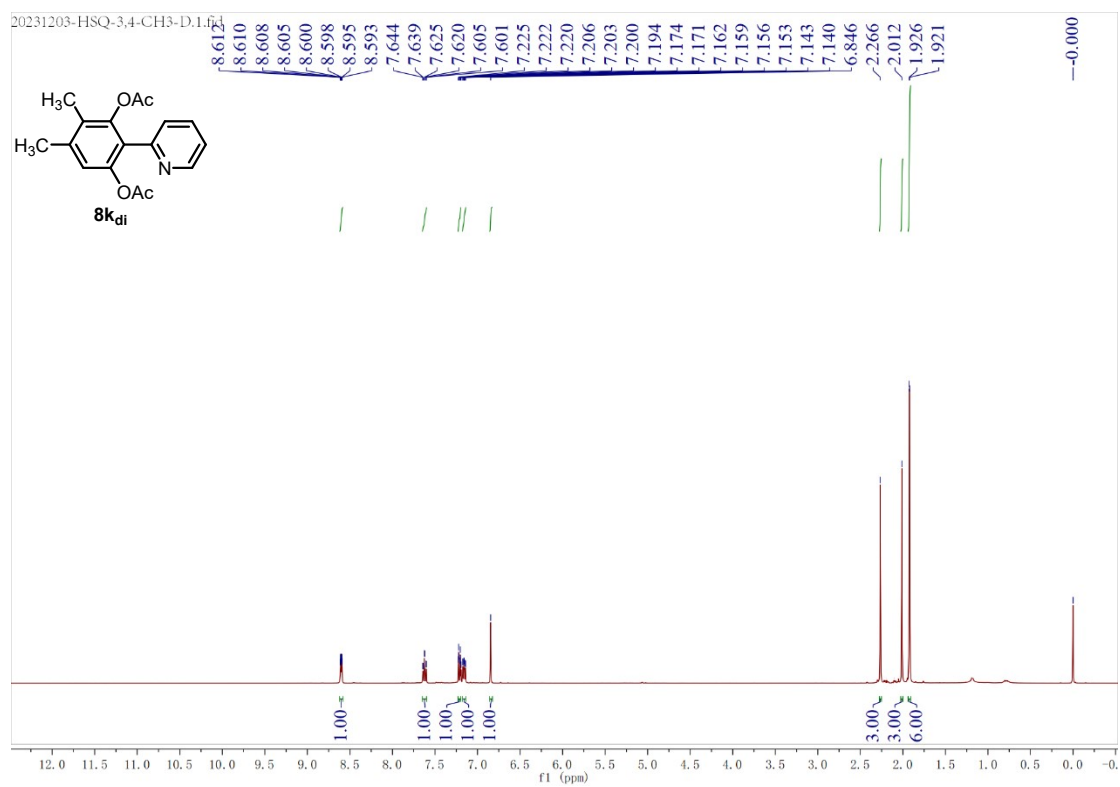

### <sup>13</sup>C NMR (100 MHz, CDCl<sub>3</sub>)

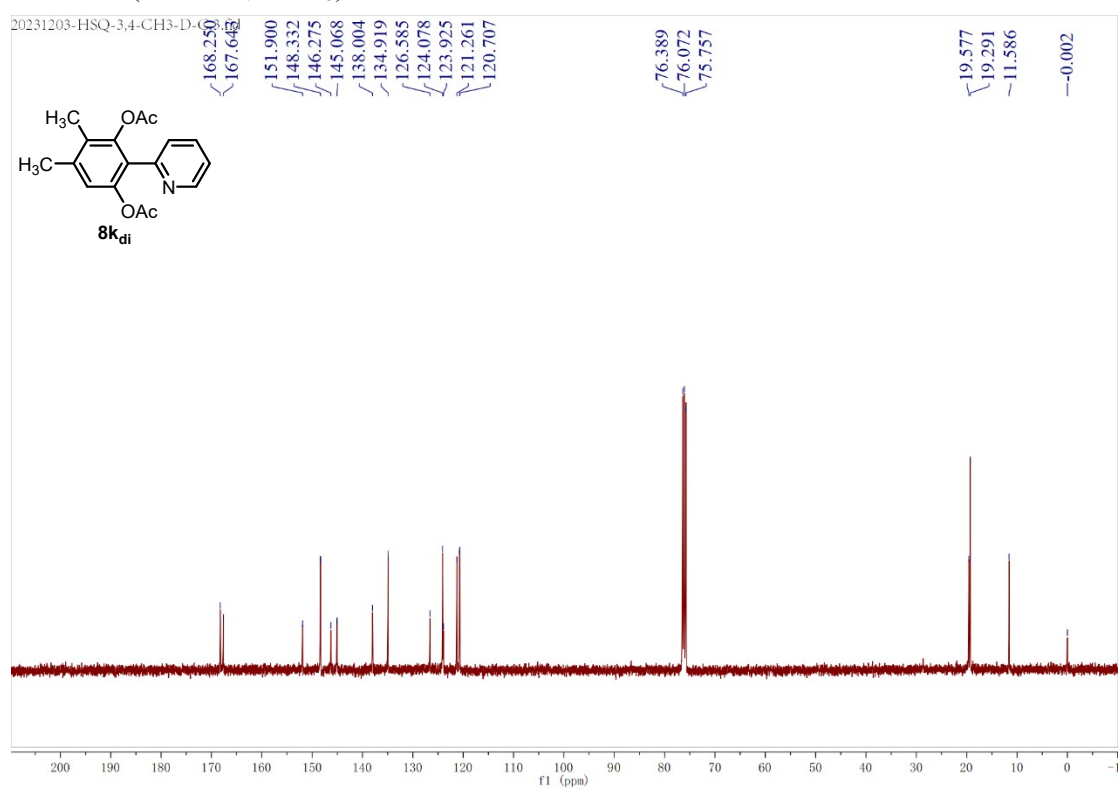

3-(pyridin-2-yl)naphthalen-2-yl acetate (**8l<sub>mono</sub>**)

### $^1\text{H}$ NMR (400 MHz, $\text{CDCl}_3$ )

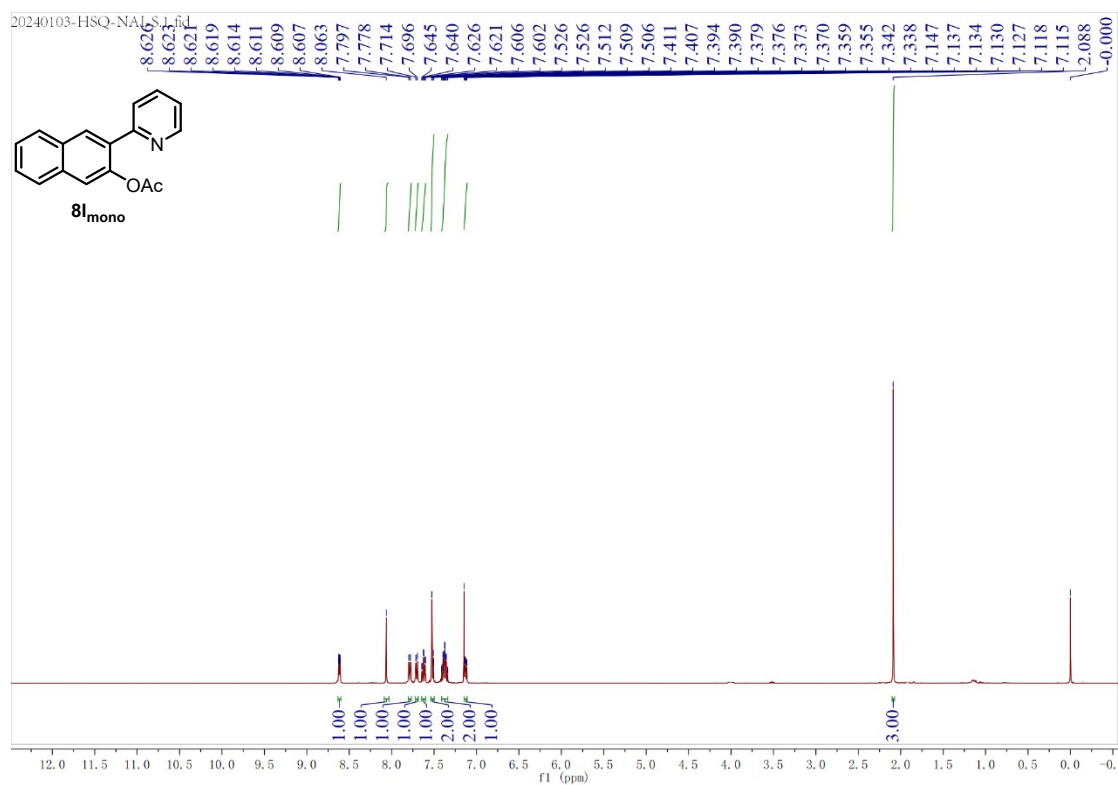

### $^{13}\text{C}$ NMR (100 MHz, $\text{CDCl}_3$ )

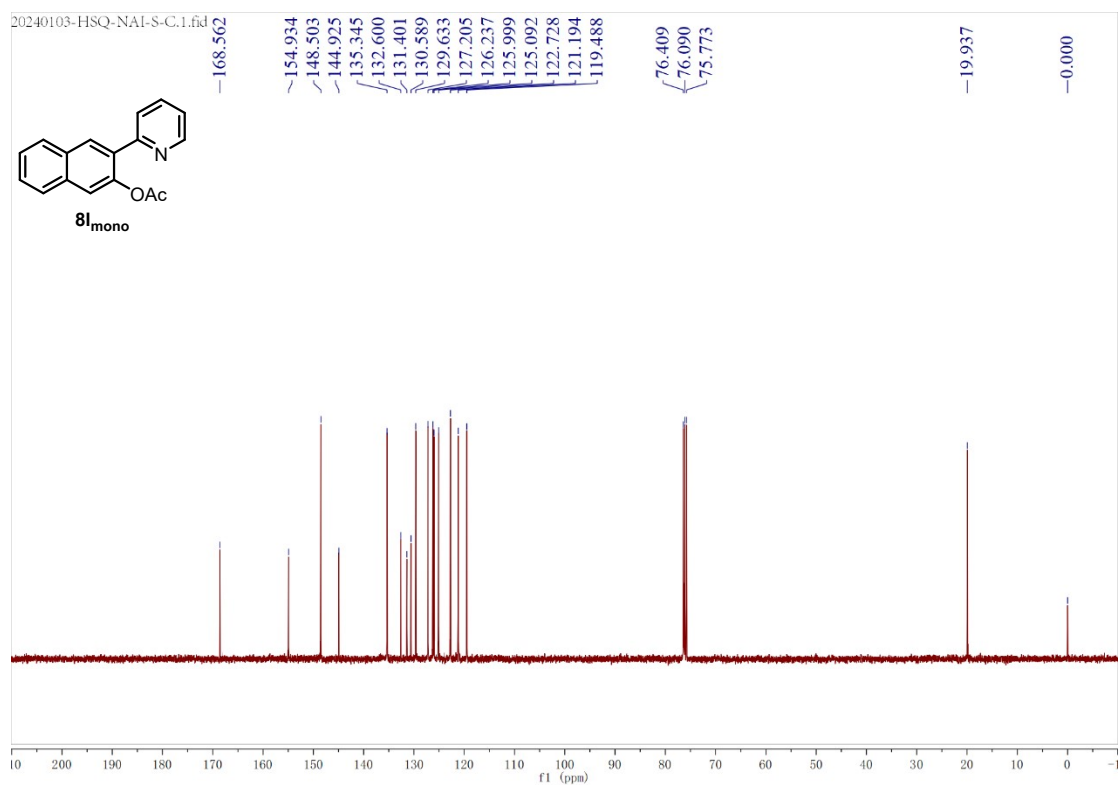

2-(pyridin-2-yl)naphthalene-1,3-diyl diacetate (**8I<sub>di</sub>**)

S64



**<sup>1</sup>H NMR (400 MHz, CDCl<sub>3</sub>)**

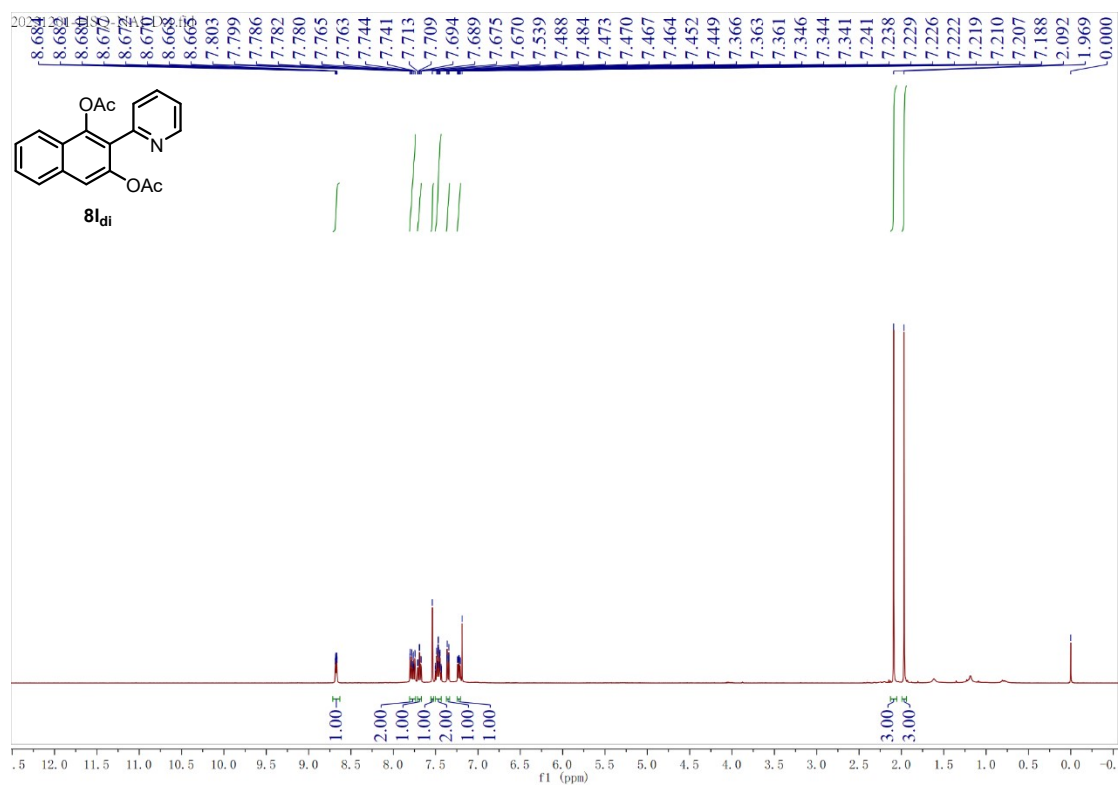

**<sup>13</sup>C NMR (100 MHz, CDCl<sub>3</sub>)**

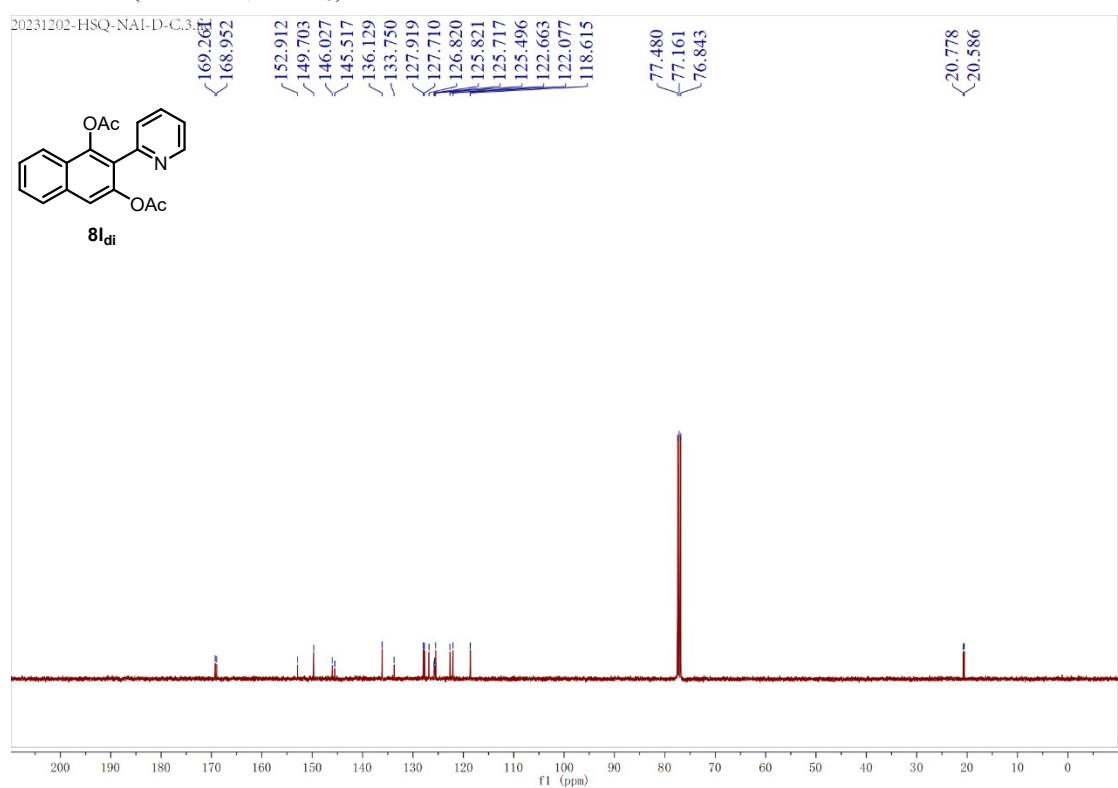

5-formyl-2-(pyridin-2-yl)phenyl acetate (**8m<sub>mono</sub>**)

### <sup>1</sup>H NMR (400 MHz, CDCl<sub>3</sub>)

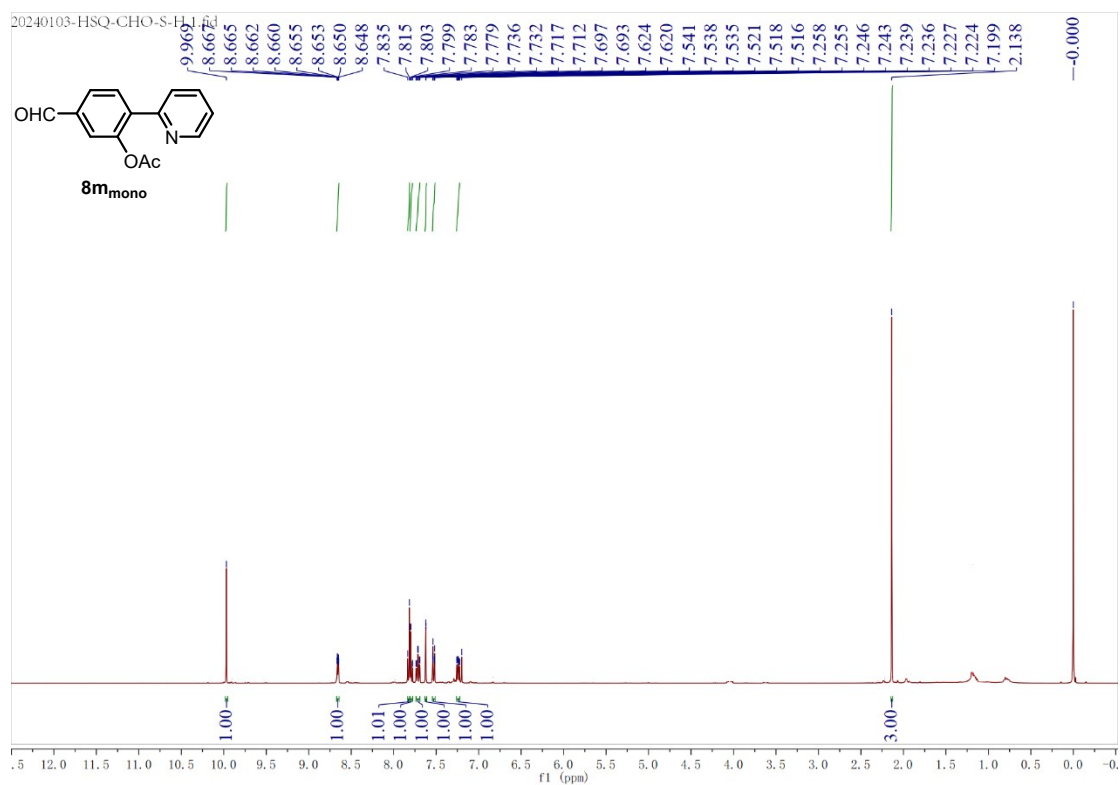

### <sup>13</sup>C NMR (100 MHz, CDCl<sub>3</sub>)

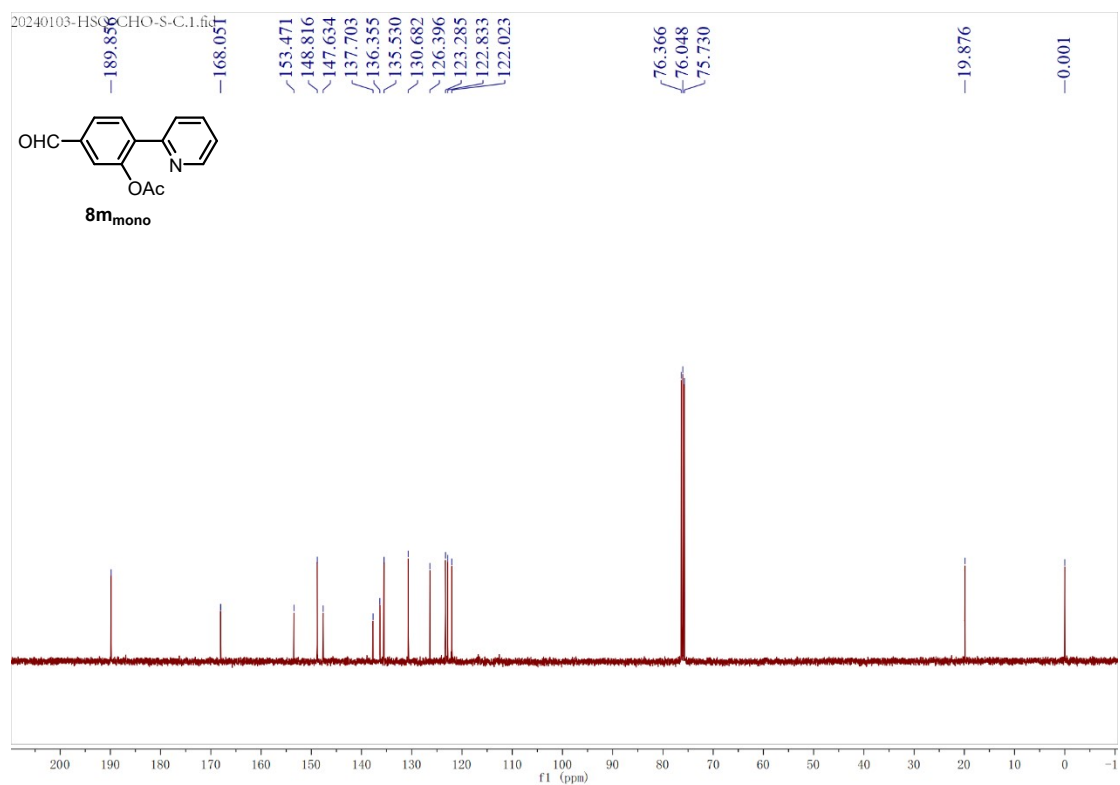

5-formyl-2-(pyridin-2-yl)-1,3-phenylene diacetate (**8m<sub>di</sub>**)

**<sup>1</sup>H NMR (400 MHz, CDCl<sub>3</sub>)**

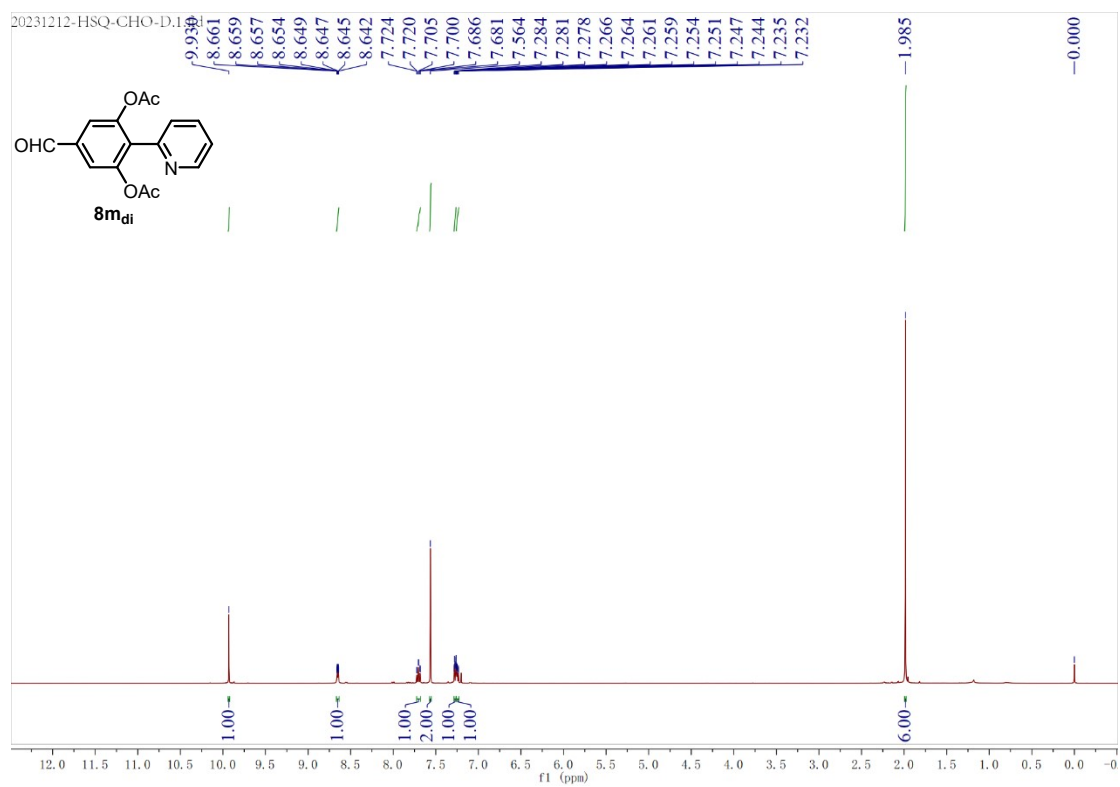

**<sup>13</sup>C NMR (100 MHz, CDCl<sub>3</sub>)**

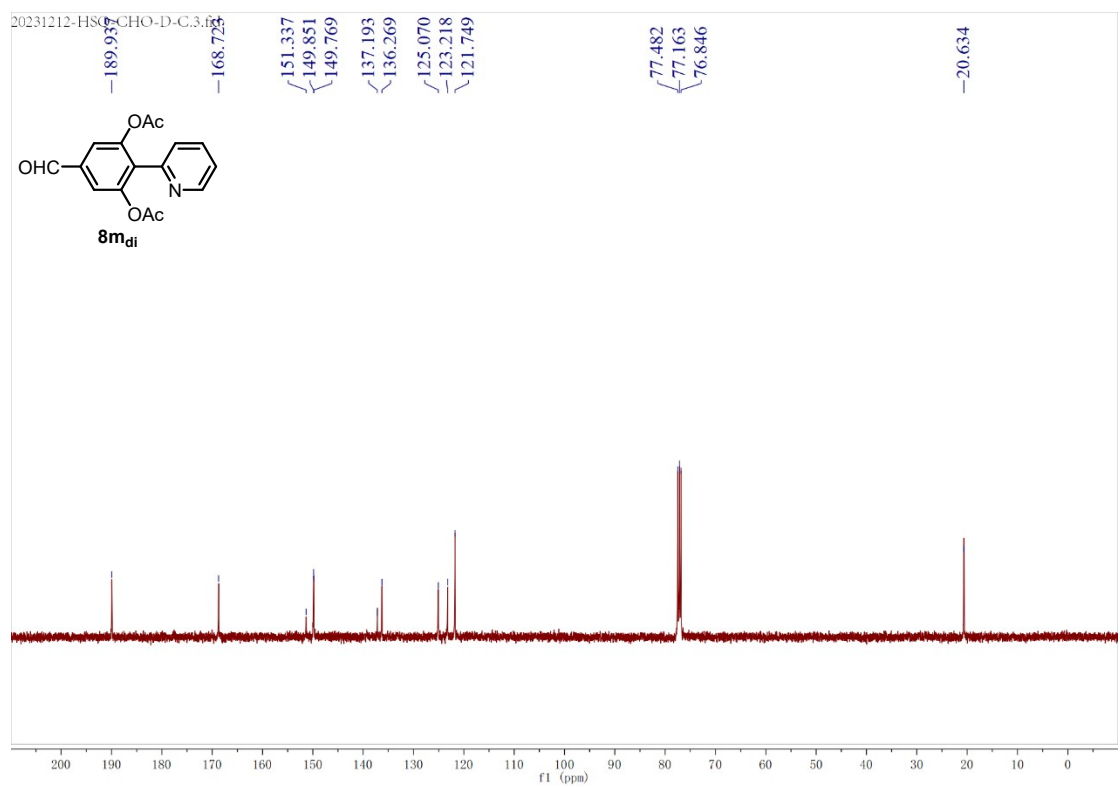

2-(5-methylpyridin-2-yl)phenyl acetate (**10<sub>a</sub><sub>mono</sub>**)

### <sup>1</sup>H NMR (400 MHz, CDCl<sub>3</sub>)

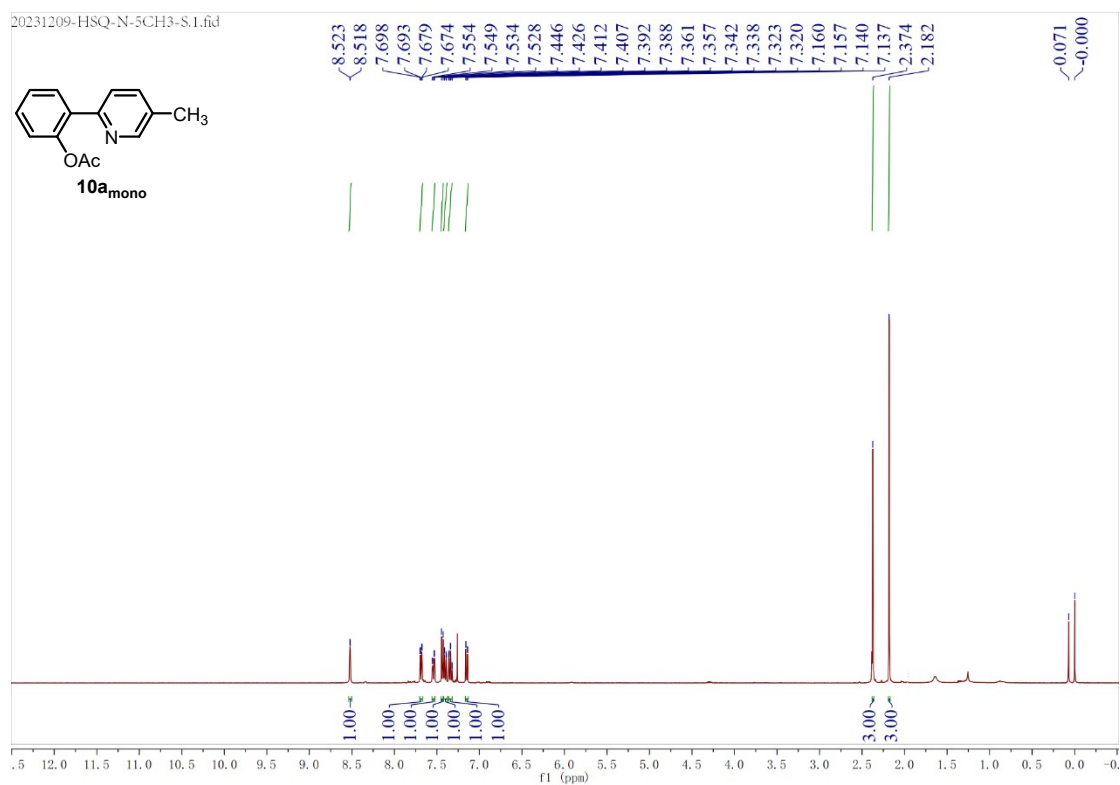

### <sup>13</sup>C NMR (100 MHz, CDCl<sub>3</sub>)

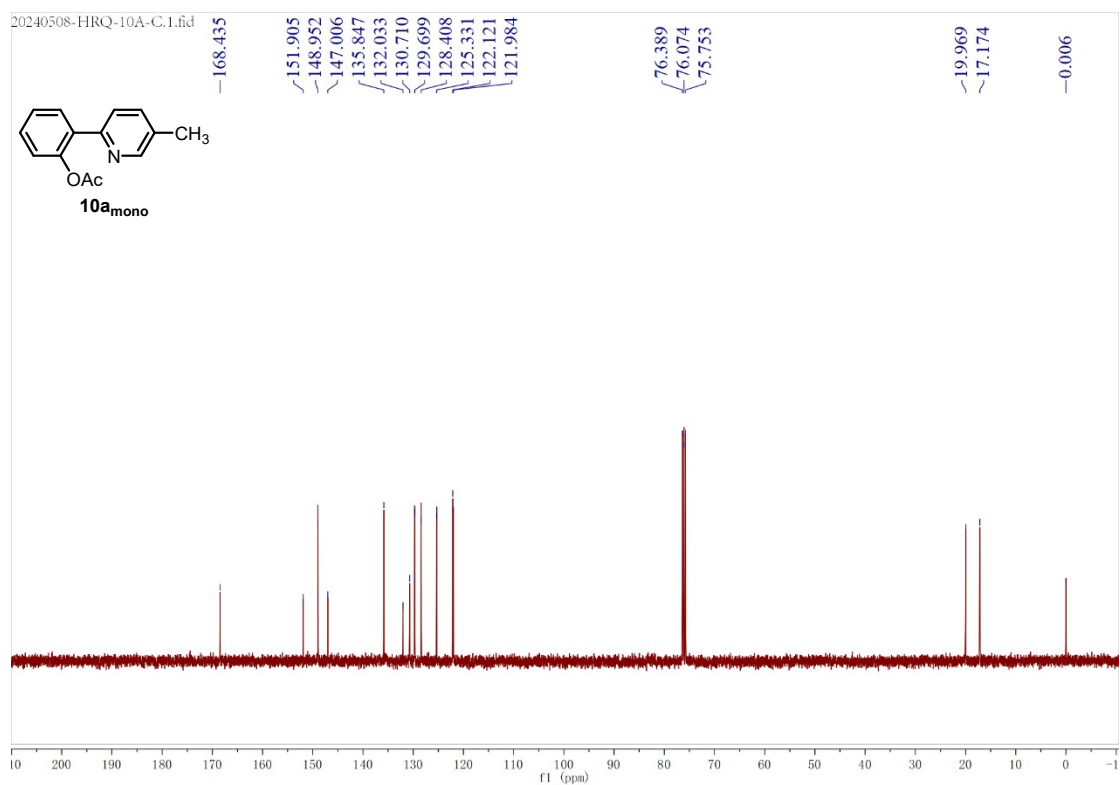

2-(5-methylpyridin-2-yl)-1,3-phenylene diacetate (**10<sub>a</sub>di**)

### $^1\text{H}$ NMR (400 MHz, $\text{CDCl}_3$ )

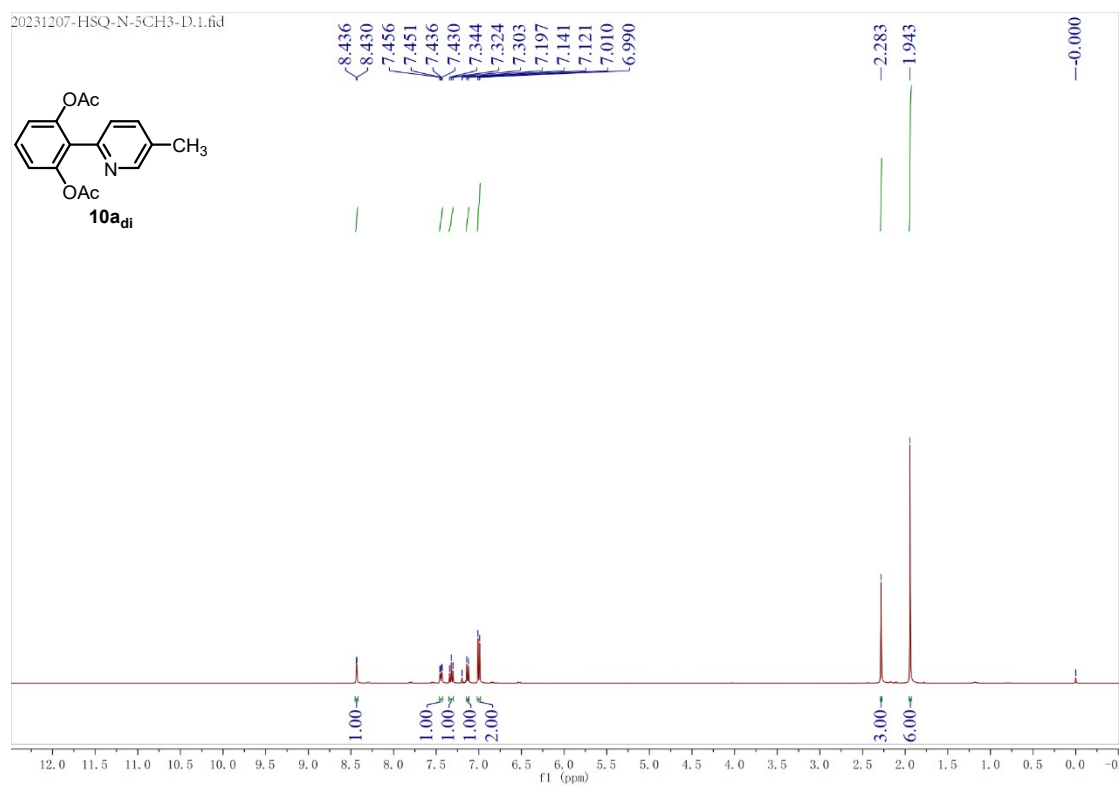

### $^{13}\text{C}$ NMR (100 MHz, $\text{CDCl}_3$ )

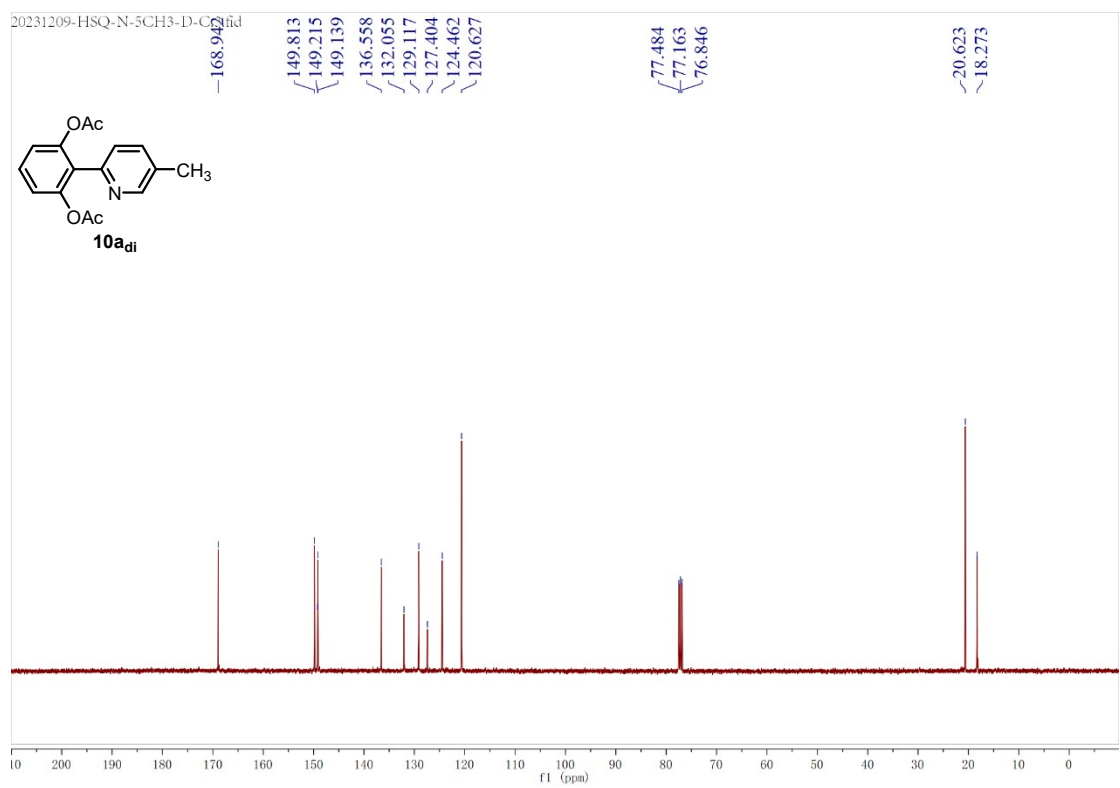

2-(6-methylpyridin-2-yl)phenyl acetate (**10b<sub>mono</sub>**)

### $^1\text{H}$ NMR (400 MHz, $\text{CDCl}_3$ )

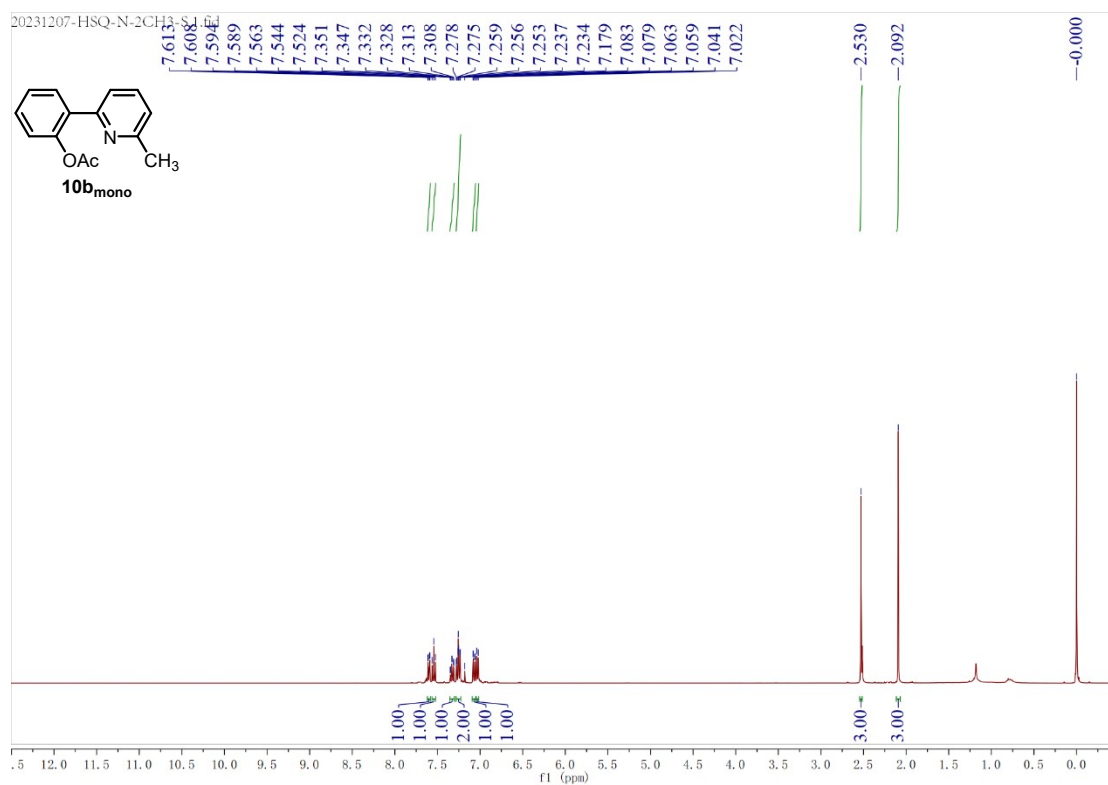

### $^{13}\text{C}$ NMR (100 MHz, $\text{CDCl}_3$ )

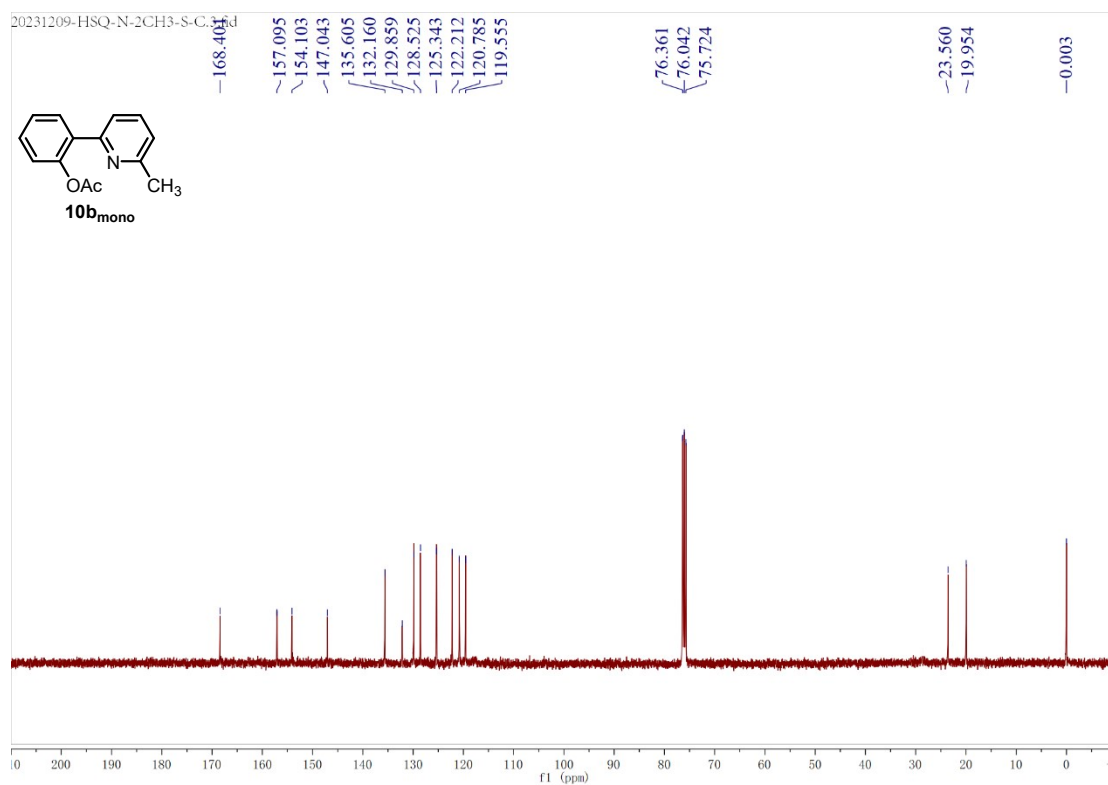

2-(6-methylpyridin-2-yl)-1,3-phenylene diacetate (**10b<sub>di</sub>**)

### $^1\text{H}$ NMR (400 MHz, $\text{CDCl}_3$ )

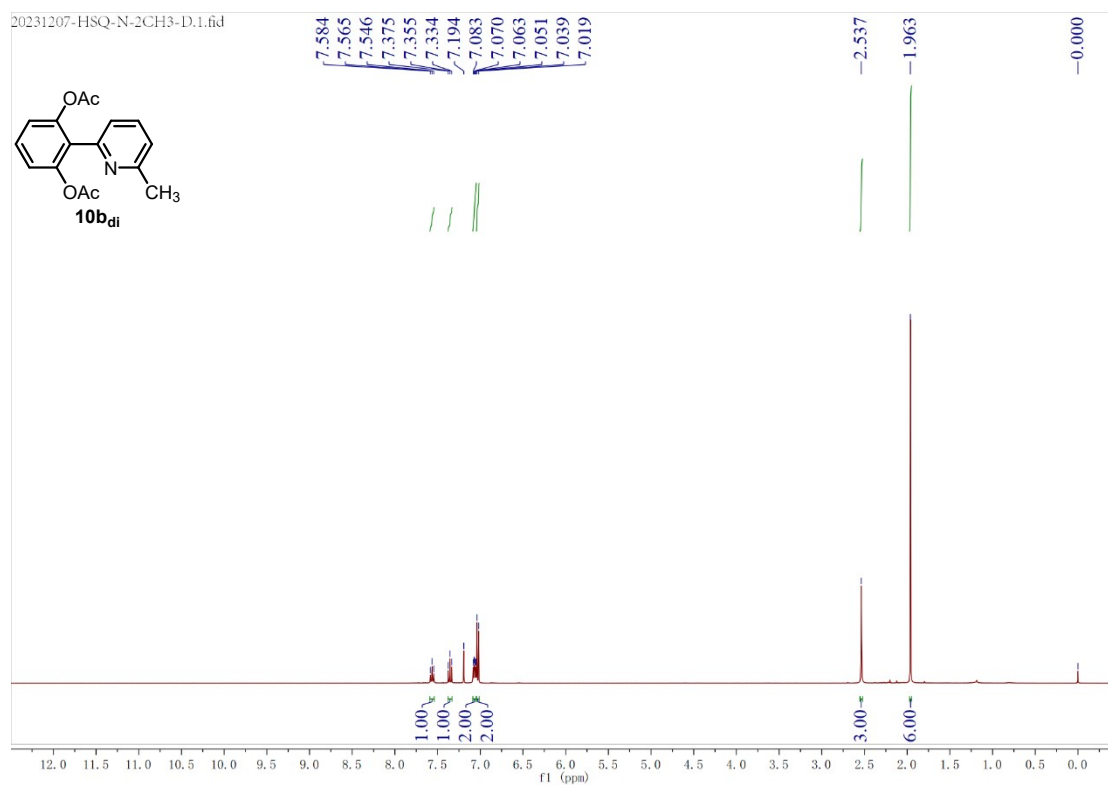

### $^{13}\text{C}$ NMR (100 MHz, $\text{CDCl}_3$ )

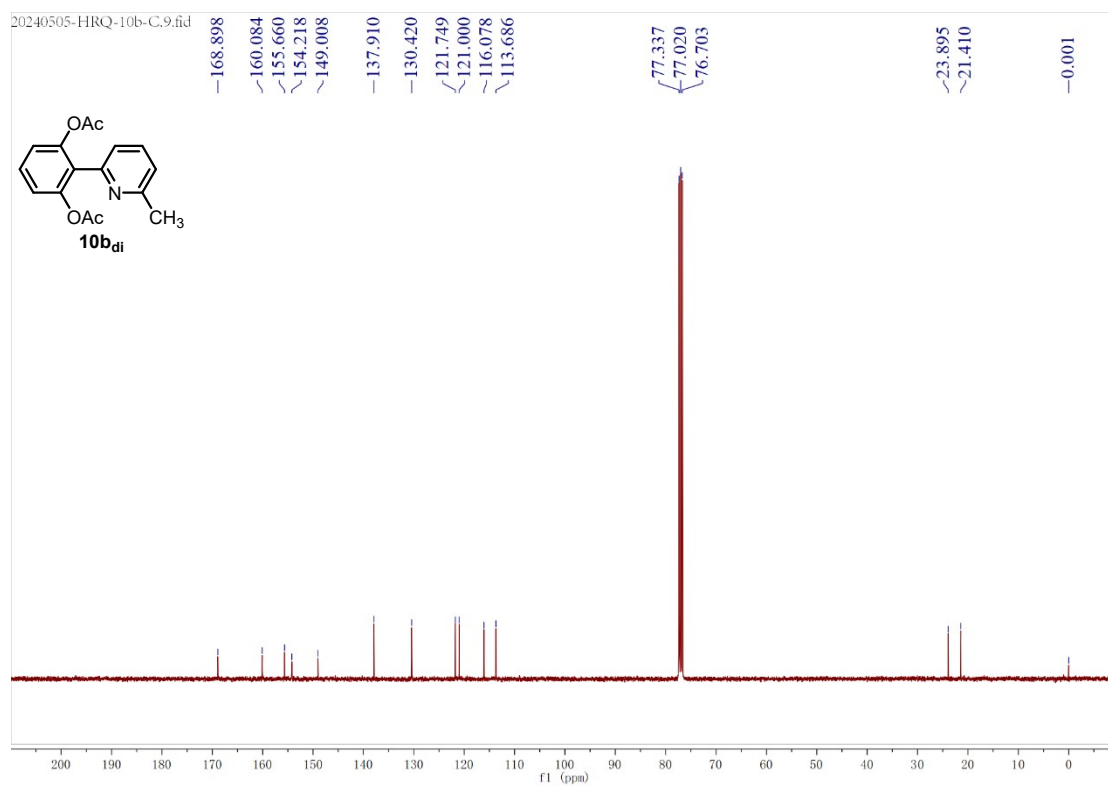

2-(4-methylpyridin-2-yl)phenyl acetate (**10c<sub>mono</sub>**)

### <sup>1</sup>H NMR (400 MHz, CDCl<sub>3</sub>)

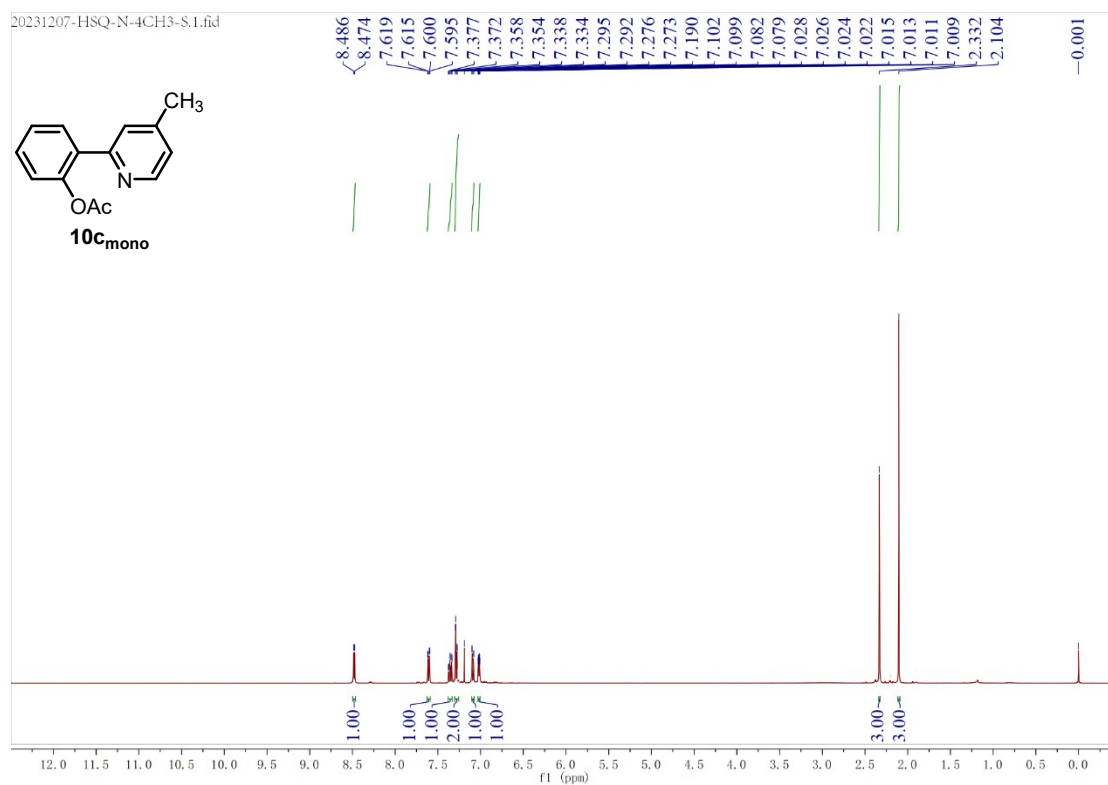

### <sup>13</sup>C NMR (100 MHz, CDCl<sub>3</sub>)

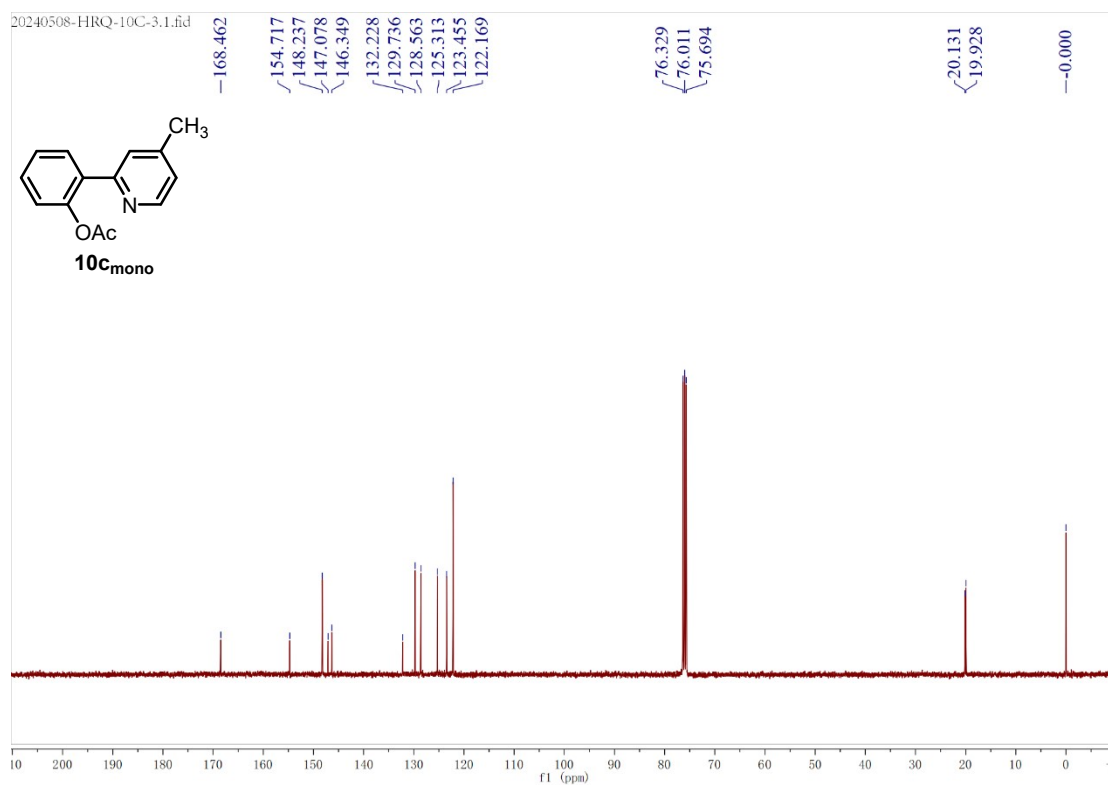

2-(4-methylpyridin-2-yl)-1,3-phenylene diacetate (**10c<sub>di</sub>**)



### $^1\text{H}$ NMR (400 MHz, $\text{CDCl}_3$ )

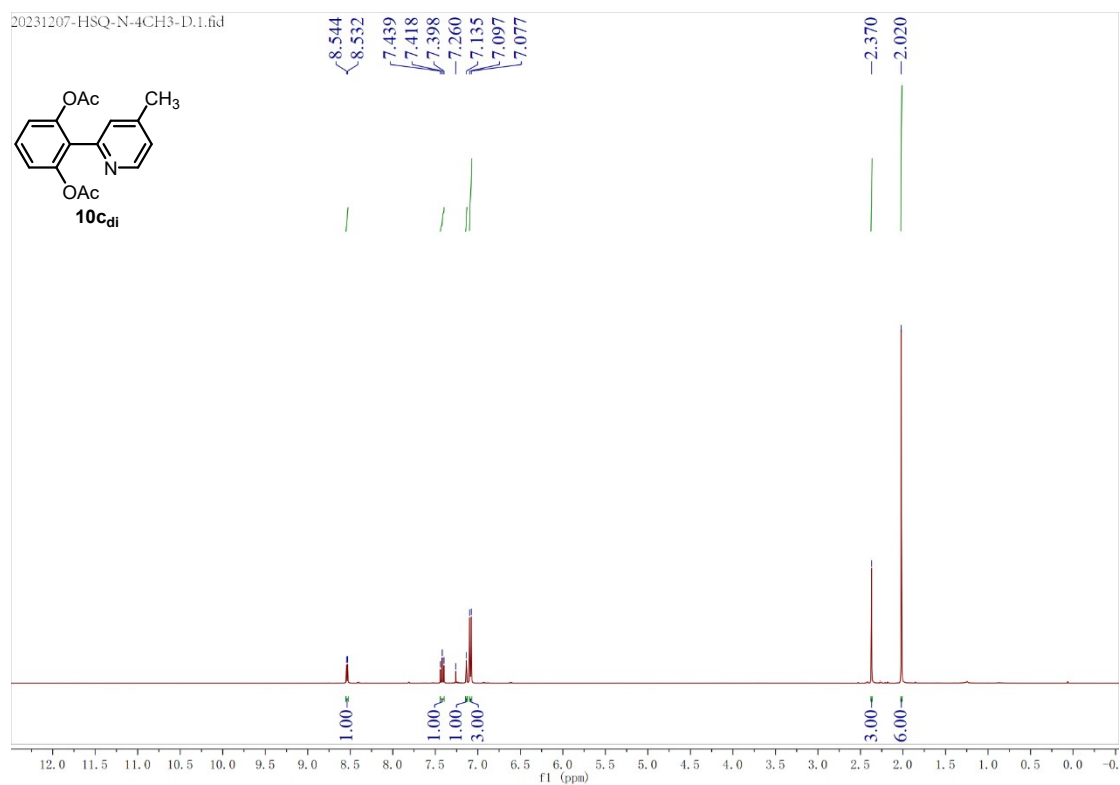

### $^{13}\text{C}$ NMR (100 MHz, $\text{CDCl}_3$ )

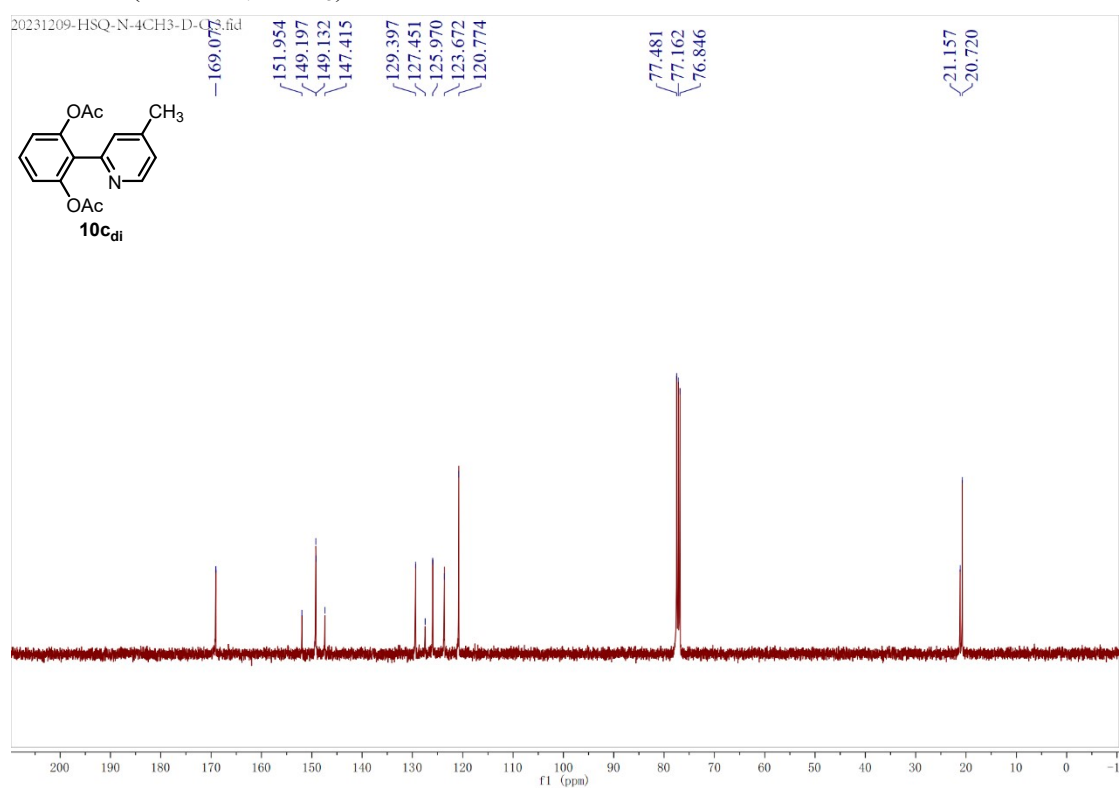

2-(3-methylpyridin-2-yl)phenyl acetate (**10d<sub>mono</sub>**)

### <sup>1</sup>H NMR (400 MHz, CDCl<sub>3</sub>)

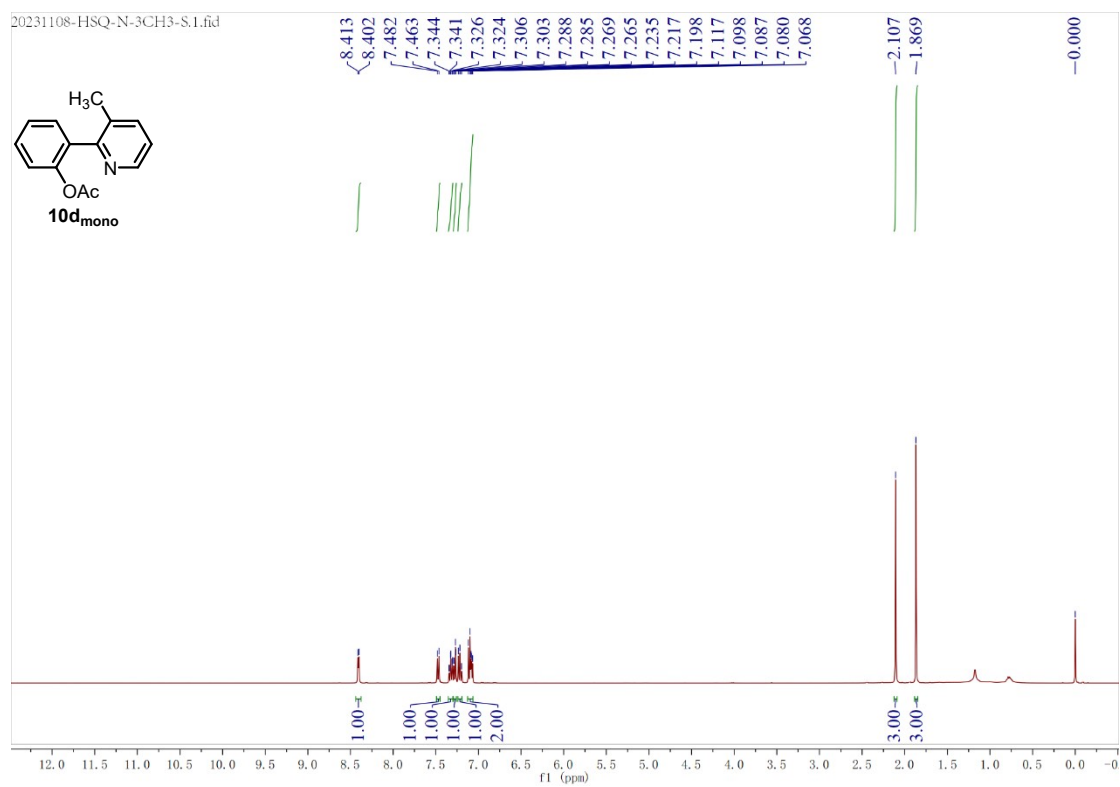

### <sup>13</sup>C NMR (100 MHz, CDCl<sub>3</sub>)

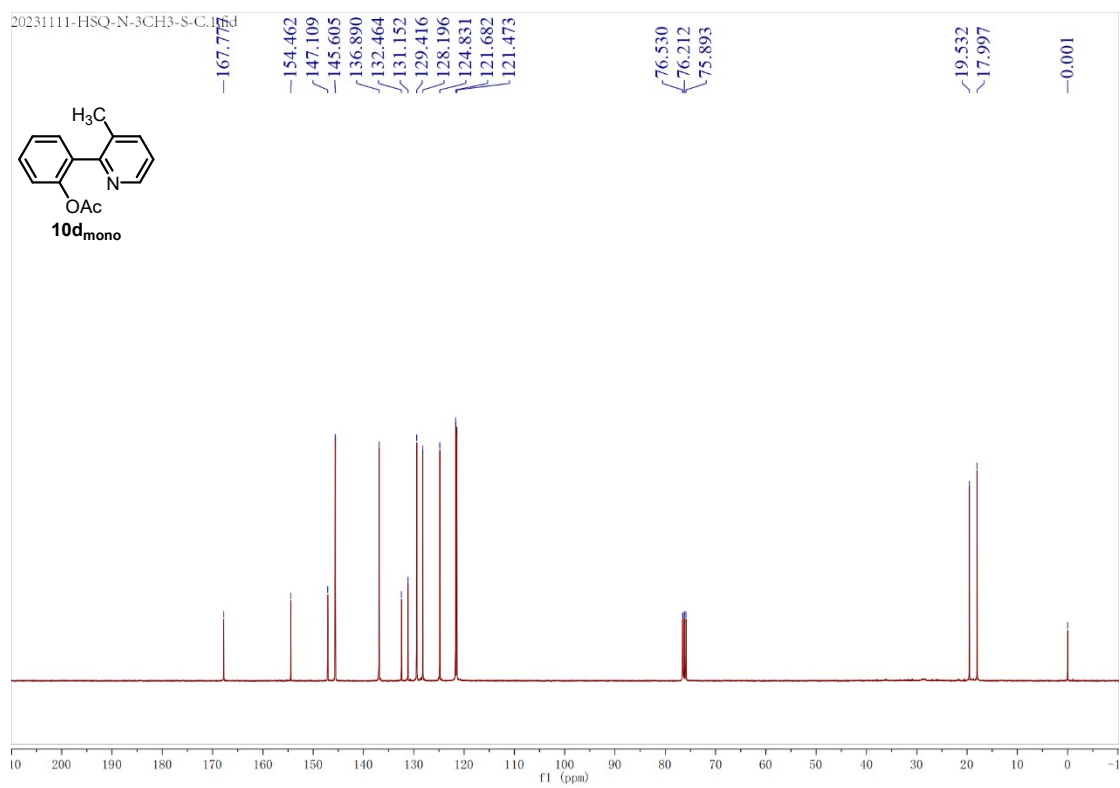

2-(3-methylpyridin-2-yl)-1,3-phenylene diacetate (**10d<sub>di</sub>**)

### $^1\text{H}$ NMR (400 MHz, $\text{CDCl}_3$ )

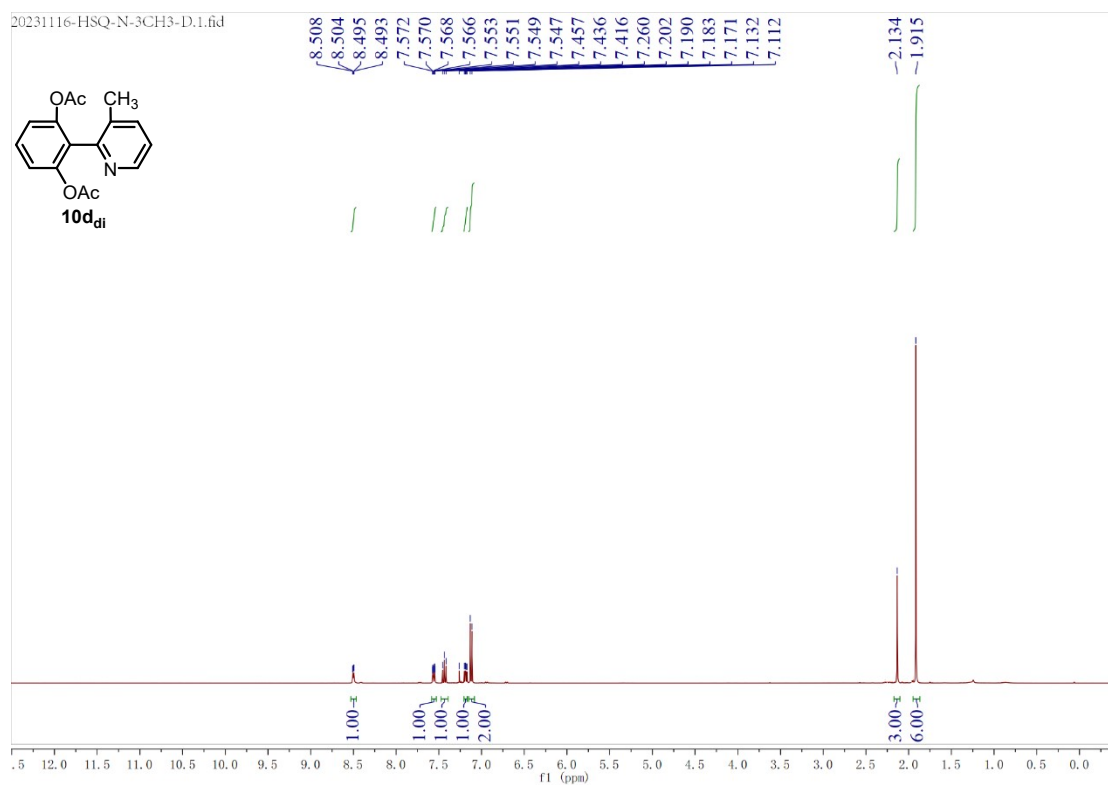

### $^{13}\text{C}$ NMR (100 MHz, $\text{CDCl}_3$ )

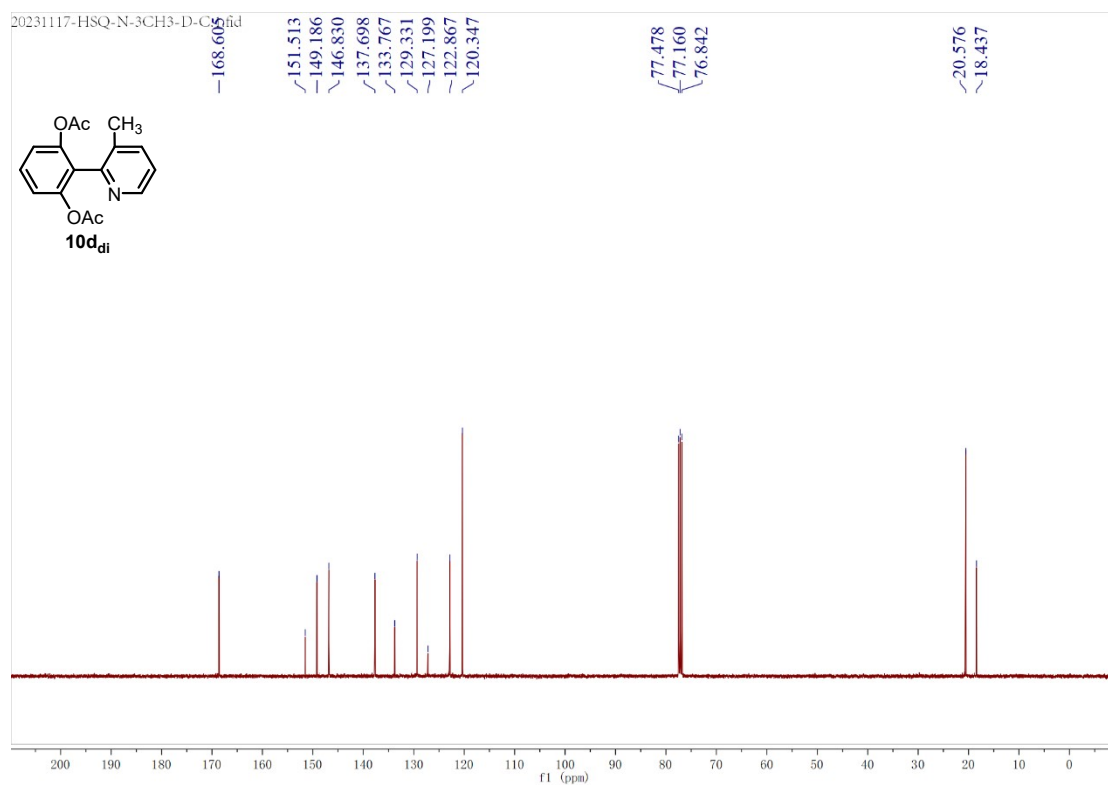

pyridine-2,6-diylbis(2,1-phenylene) diacetate (**10e<sub>ii</sub>**)

### <sup>1</sup>H NMR (400 MHz, CDCl<sub>3</sub>)

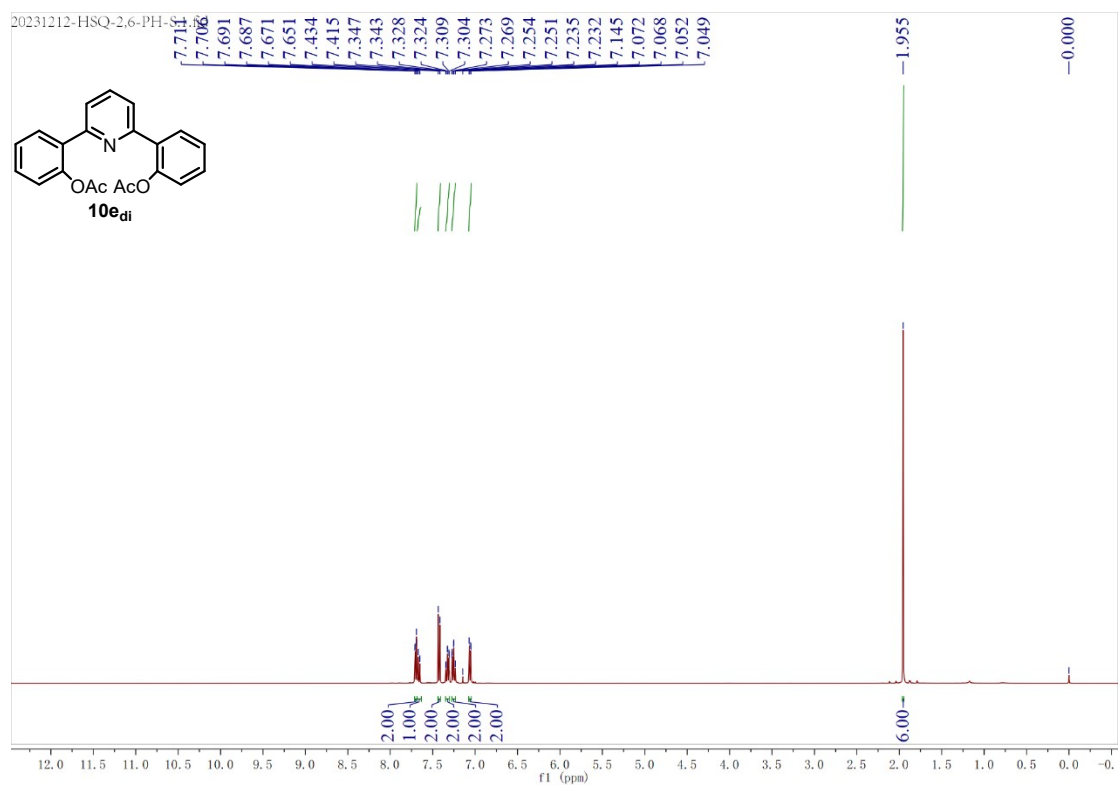

### <sup>13</sup>C NMR (100 MHz, CDCl<sub>3</sub>)

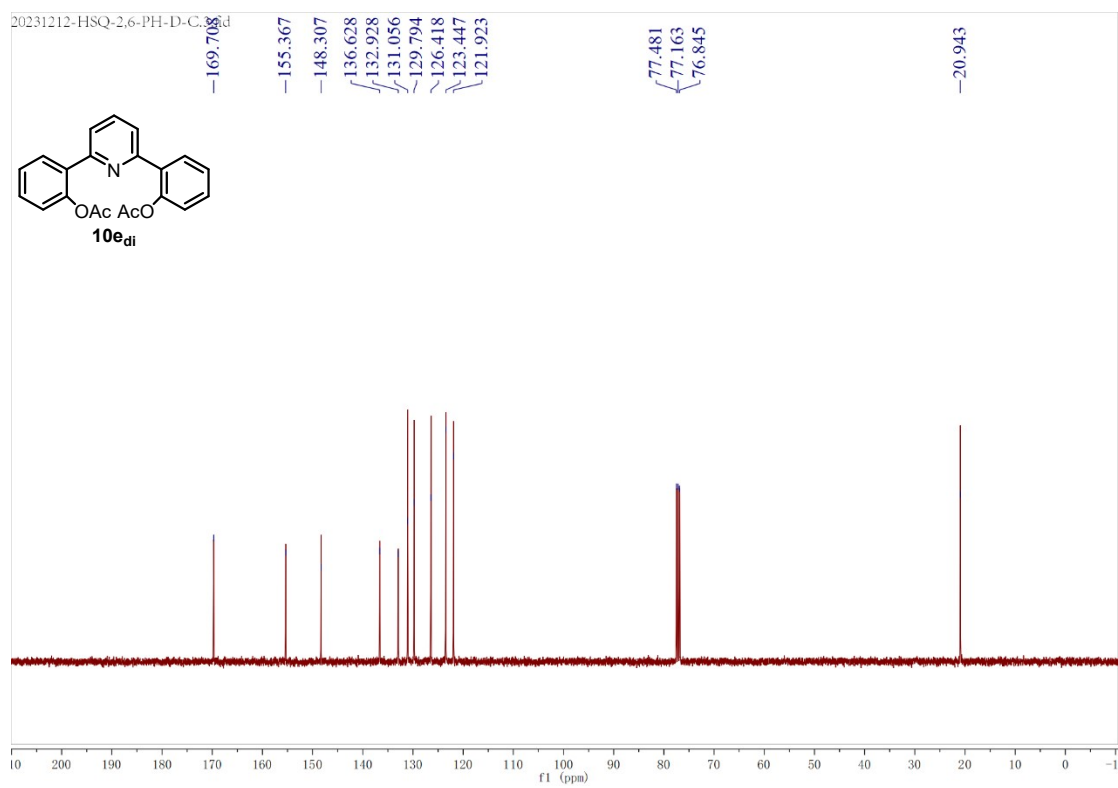

2-(pyrimidin-2-yl)phenyl acetate (**10<sub>f<sub>mono</sub></sub>**)

### $^1\text{H}$ NMR (400 MHz, $\text{CDCl}_3$ )

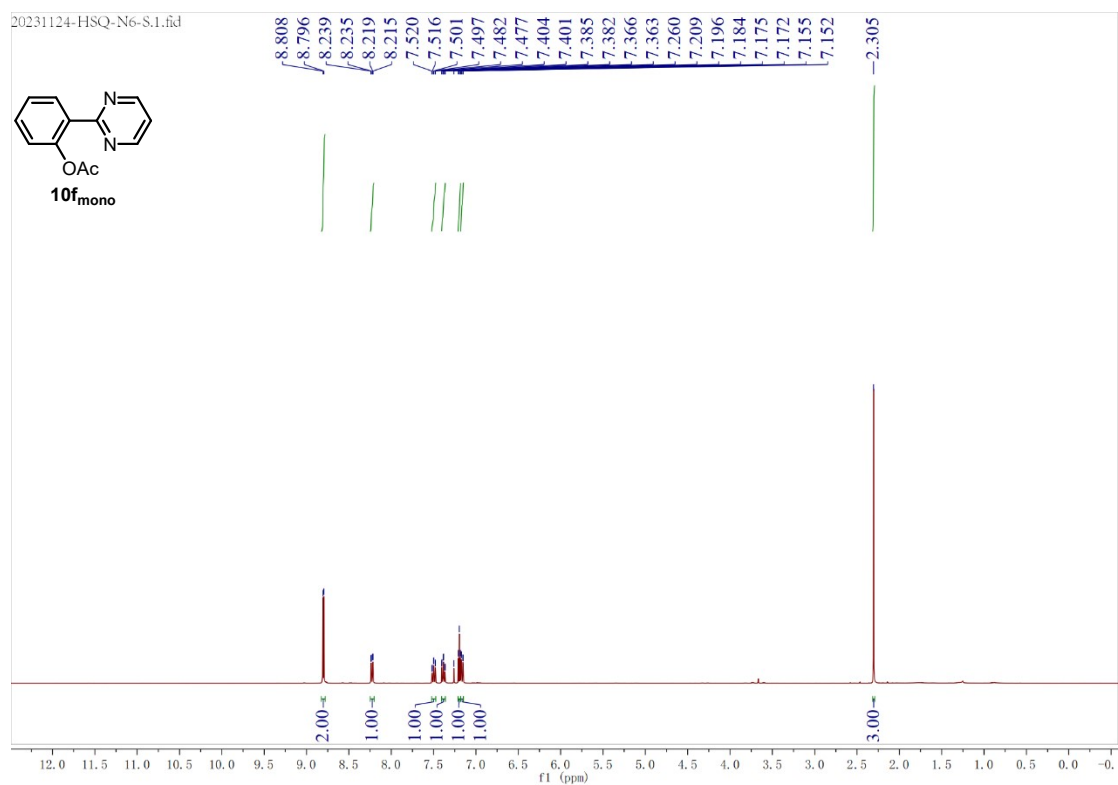

### $^{13}\text{C}$ NMR (100 MHz, $\text{CDCl}_3$ )

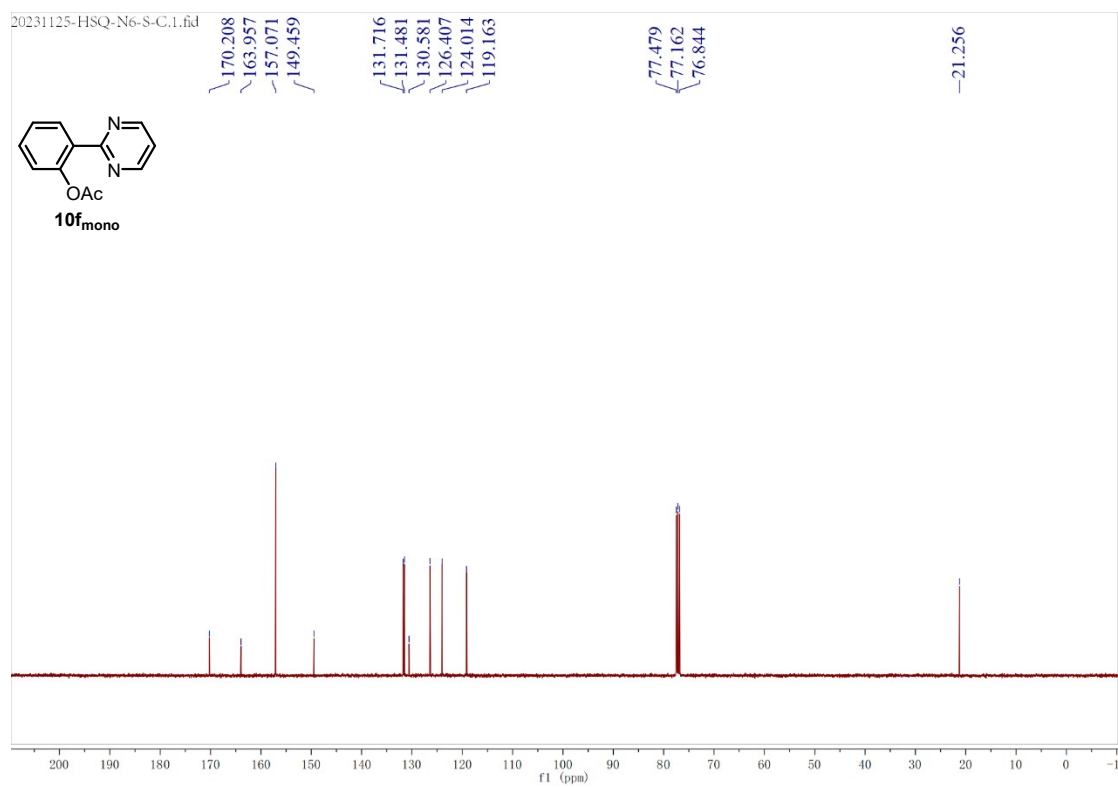

2-(pyrimidin-2-yl)-1,3-phenylene diacetate (**10f<sub>di</sub>**)

### <sup>1</sup>H NMR (400 MHz, CDCl<sub>3</sub>)

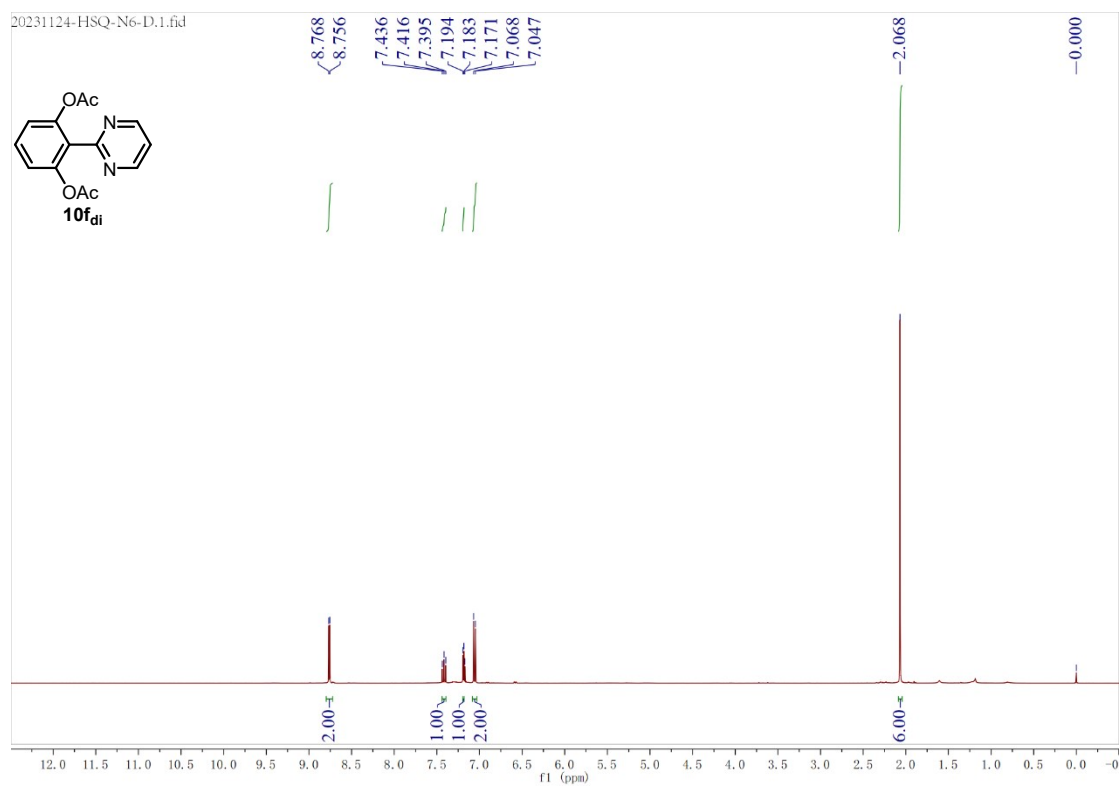

### <sup>13</sup>C NMR (100 MHz, CDCl<sub>3</sub>)

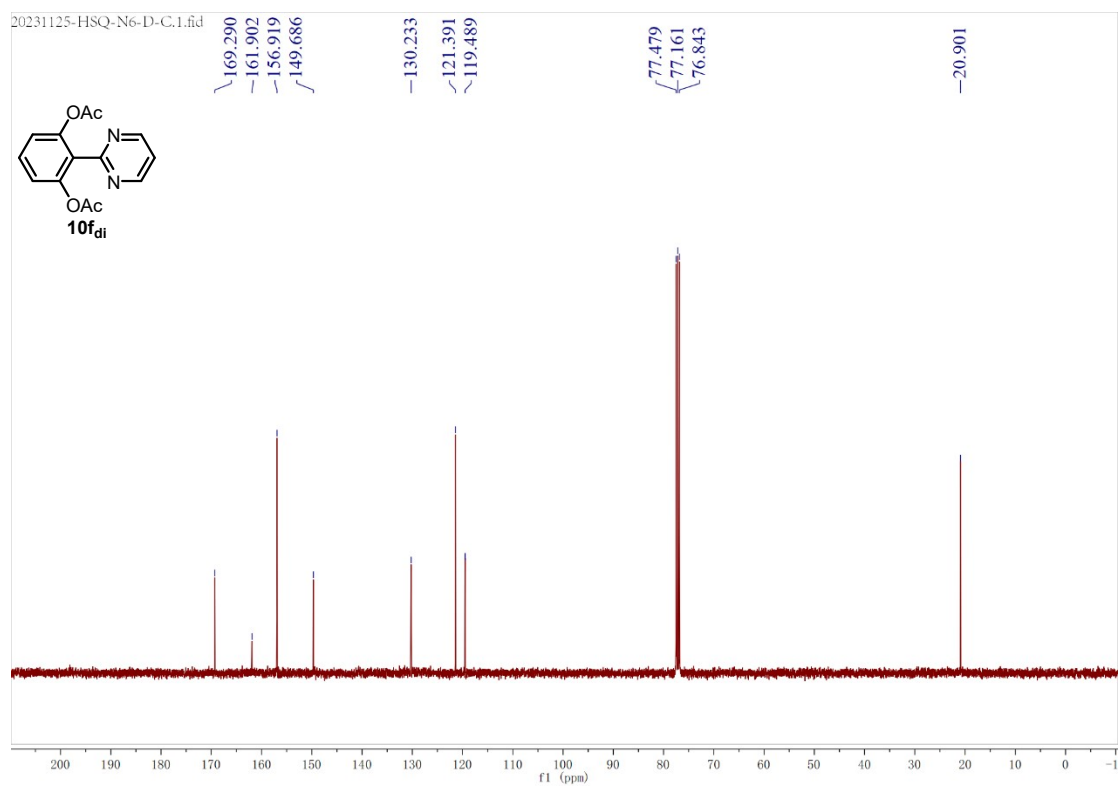

(E)-2-(phenyldiazenyl)phenyl acetate (**10g<sub>mono</sub>**)

**<sup>1</sup>H NMR (400 MHz, CDCl<sub>3</sub>)**

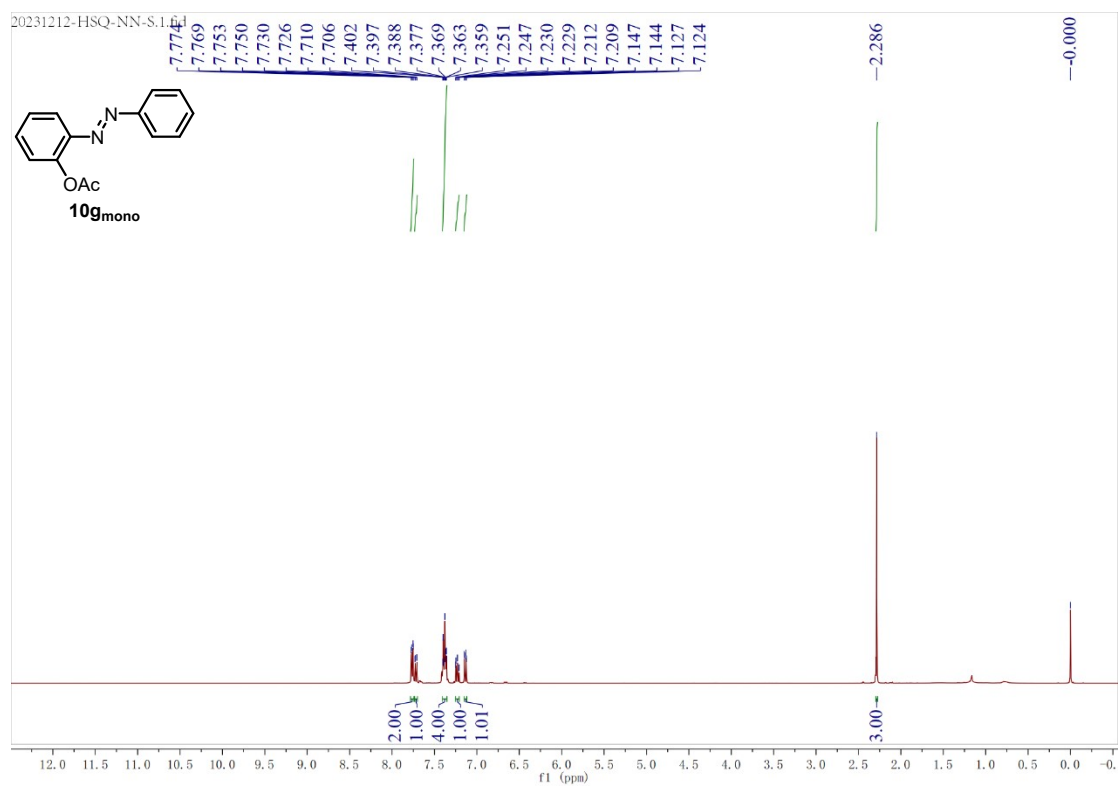

**<sup>13</sup>C NMR (100 MHz, CDCl<sub>3</sub>)**

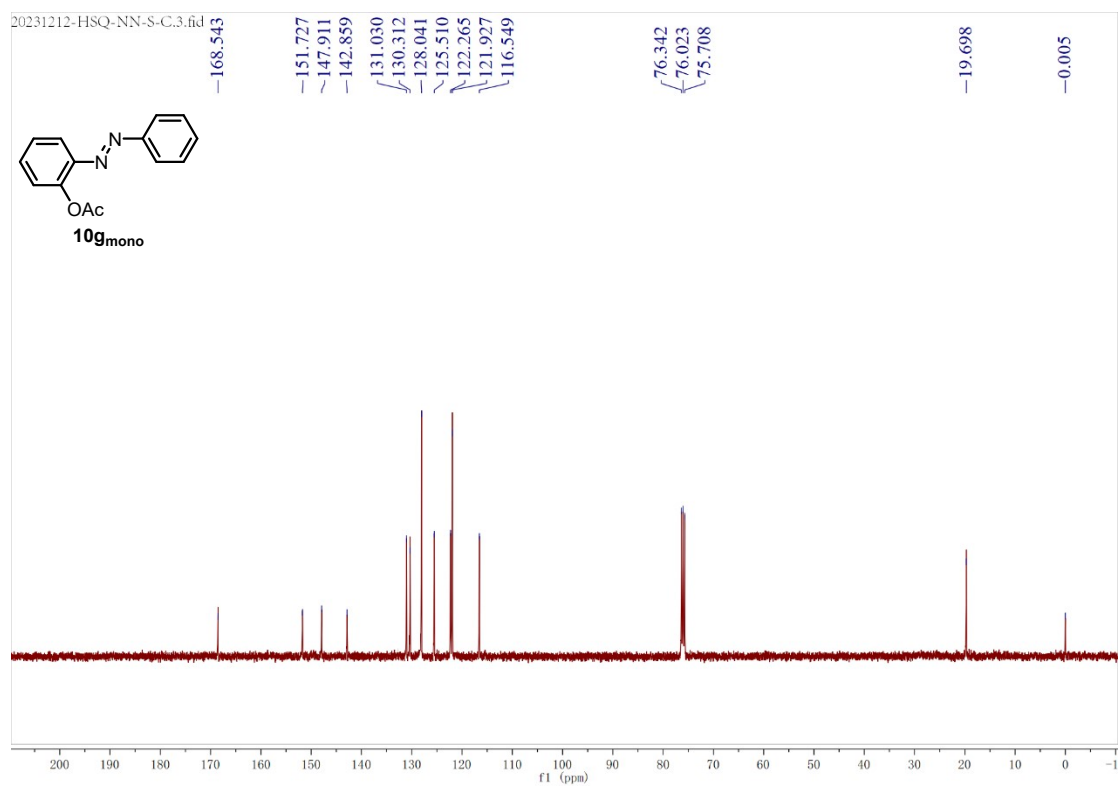

(E)-diazene-1,2-diylbis(2,1-phenylene) diacetate (**10g<sub>di</sub>**)

### <sup>1</sup>H NMR (400 MHz, CDCl<sub>3</sub>)

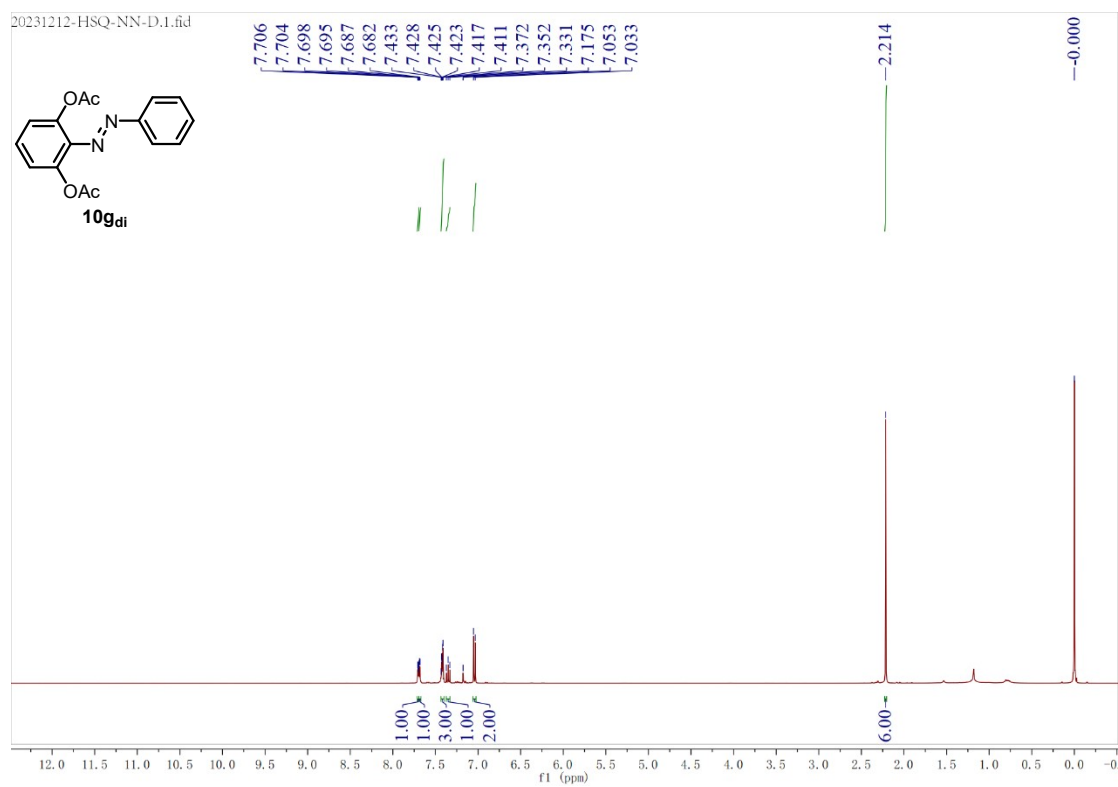

### <sup>13</sup>C NMR (100 MHz, CDCl<sub>3</sub>)

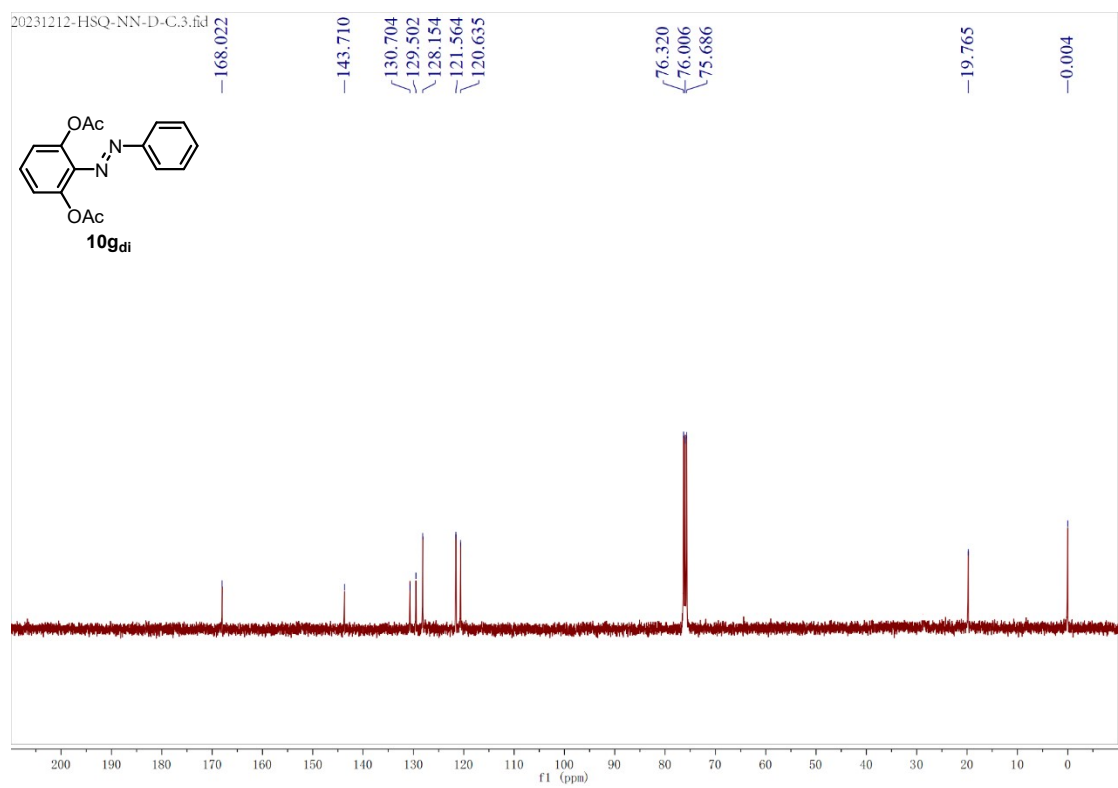

2-(2H-imidazol-2-yl)phenyl acetate (**10h<sub>mono</sub>**)



**<sup>1</sup>H NMR (400 MHz, CDCl<sub>3</sub>)**

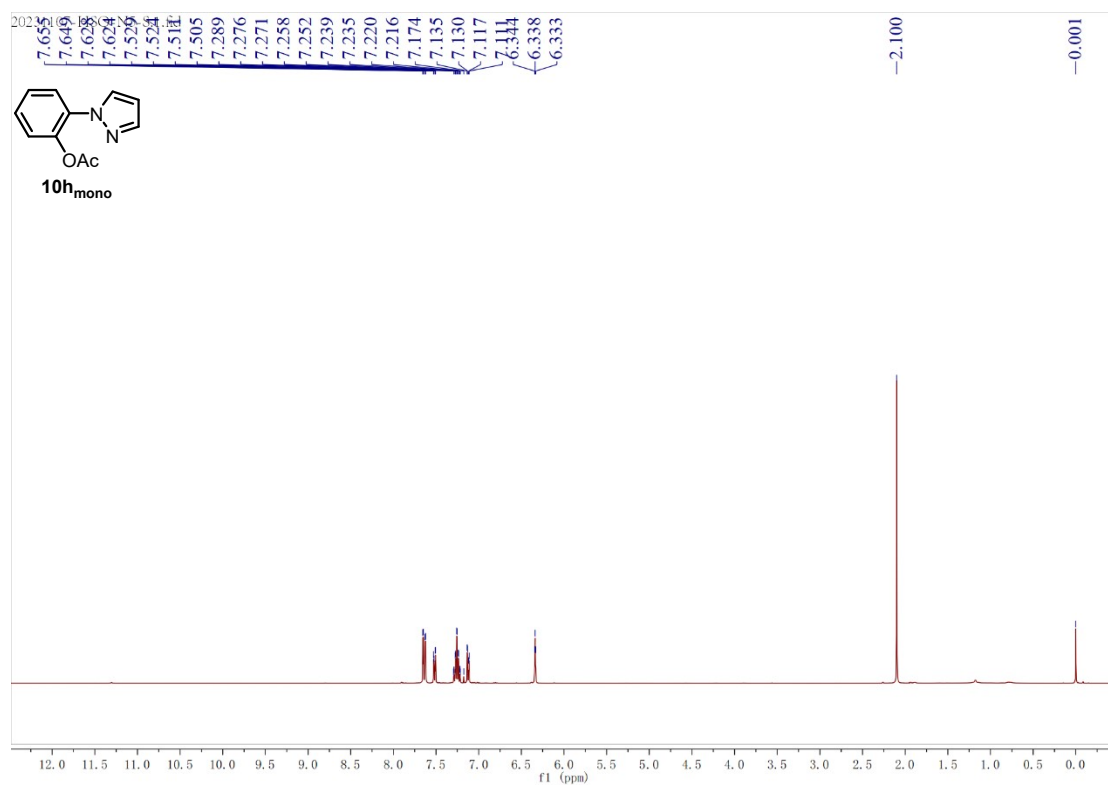

**<sup>13</sup>C NMR (100 MHz, CDCl<sub>3</sub>)**

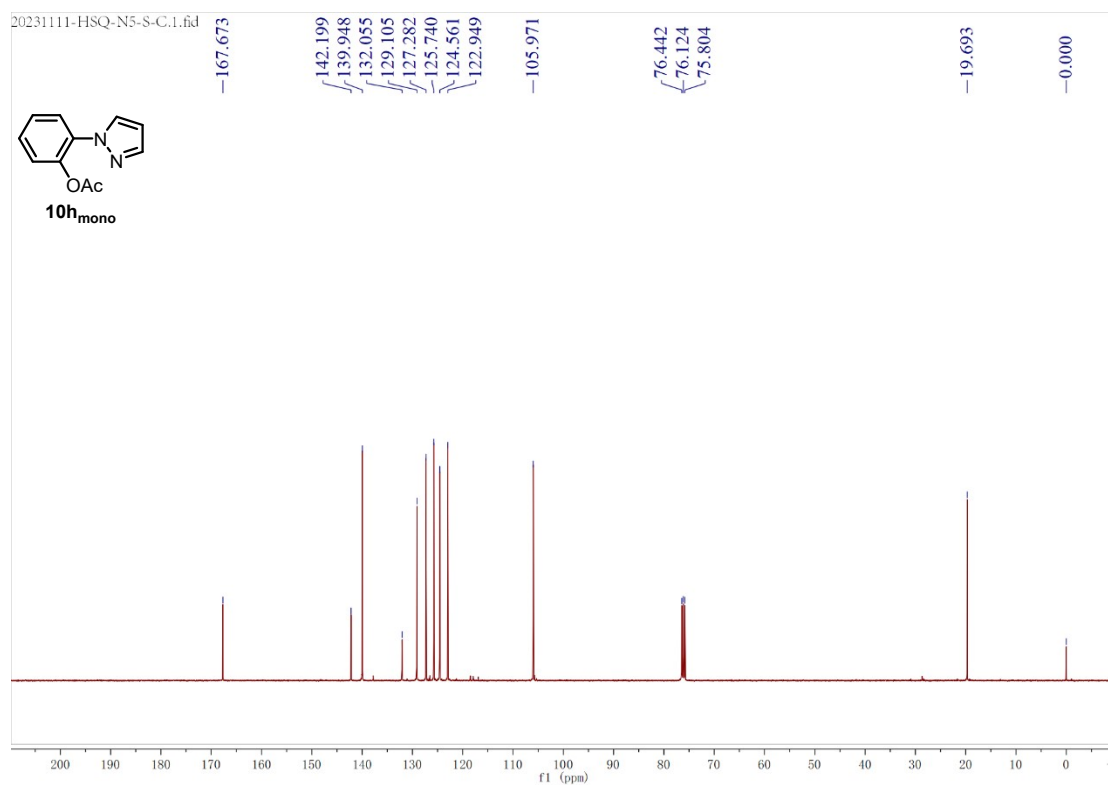

2-(2H-imidazol-2-yl)-1,3-phenylene diacetate (**10<sub>h</sub>di**)

### $^1\text{H}$ NMR (400 MHz, $\text{CDCl}_3$ )

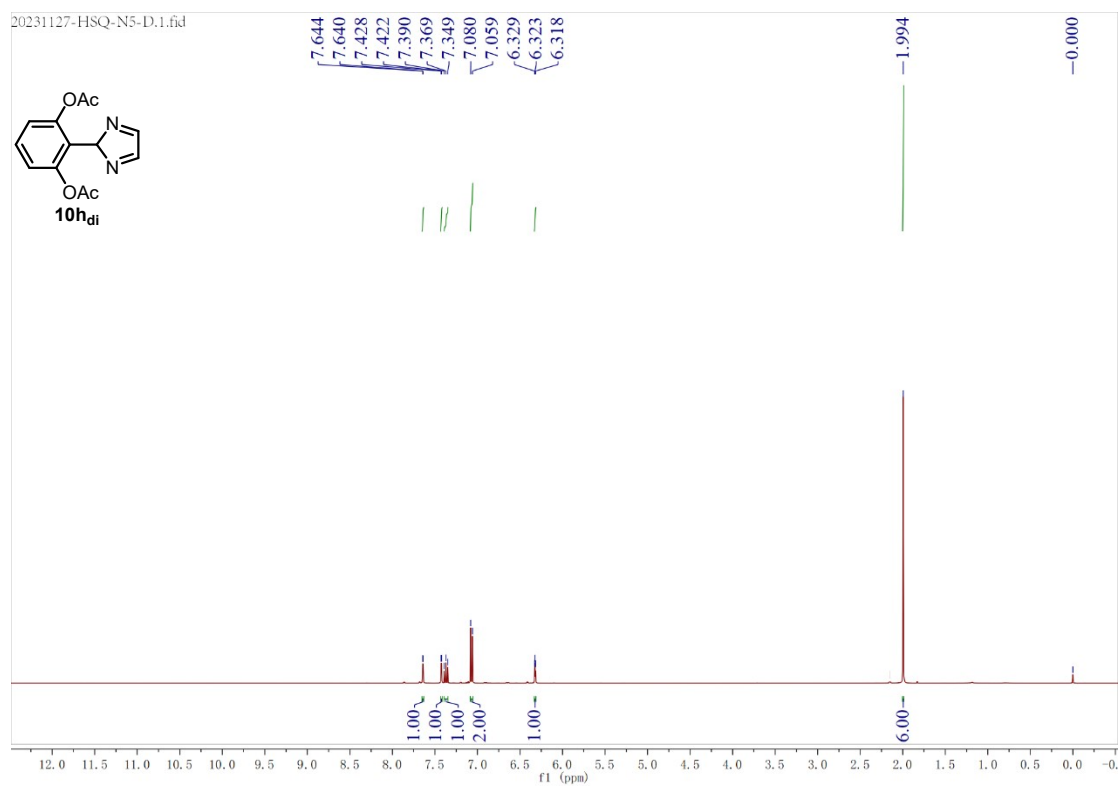

### $^{13}\text{C}$ NMR (100 MHz, $\text{CDCl}_3$ )

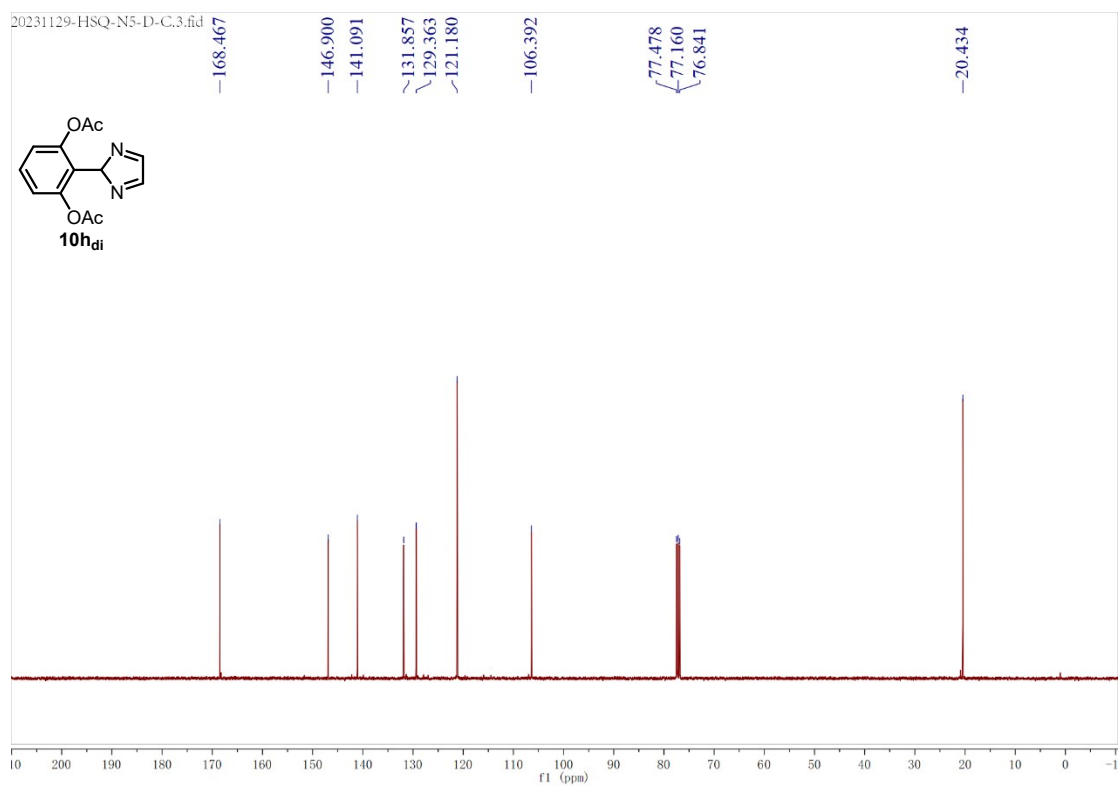

2-(6-chloro-3-phenylpyrazin-2-yl)phenyl acetate (**10<sub>i mono</sub>**)

### <sup>1</sup>H NMR (400 MHz, CDCl<sub>3</sub>)

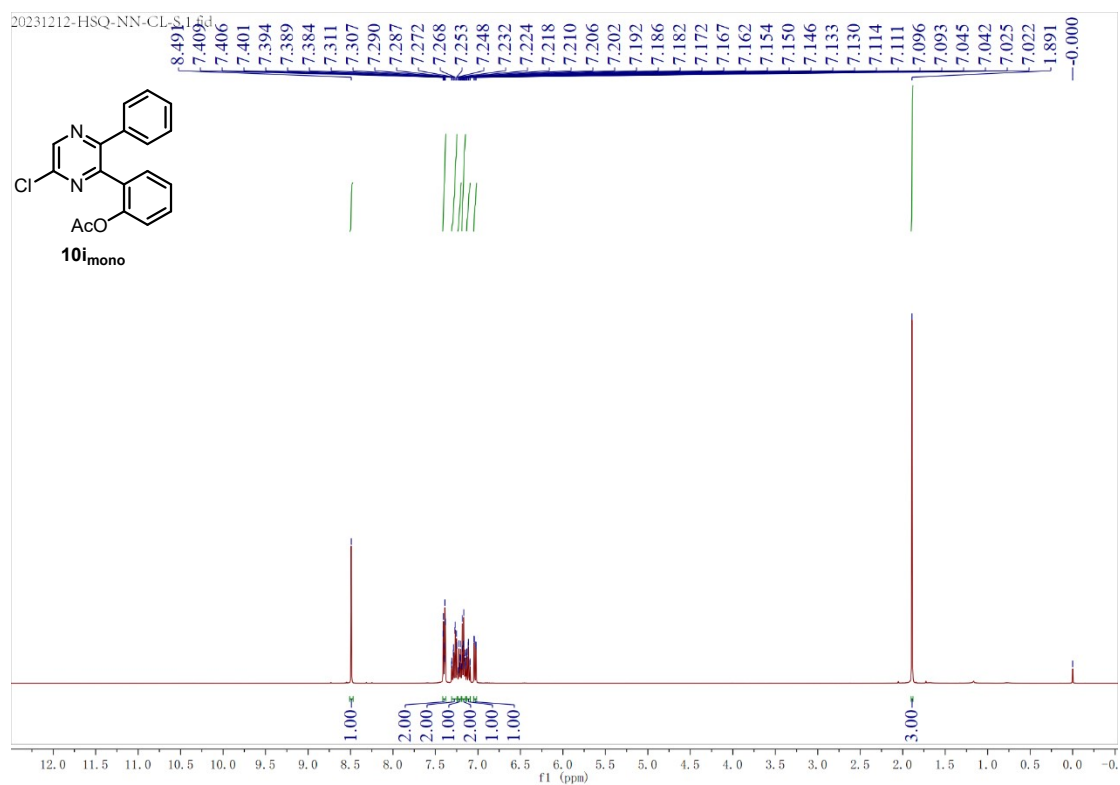

### <sup>13</sup>C NMR (100 MHz, CDCl<sub>3</sub>)

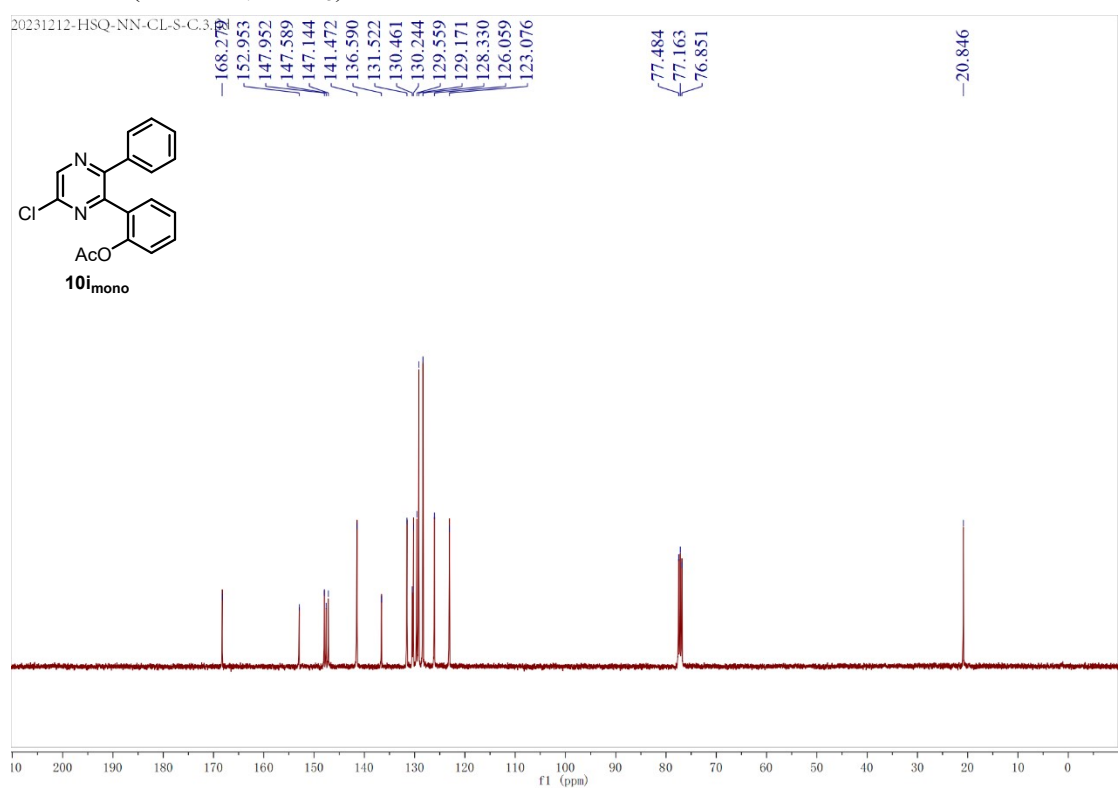

2-(6-chloro-3-phenylpyrazin-2-yl)-1,3-phenylene diacetate (**10i<sub>di</sub>**)

### <sup>1</sup>H NMR (400 MHz, CDCl<sub>3</sub>)

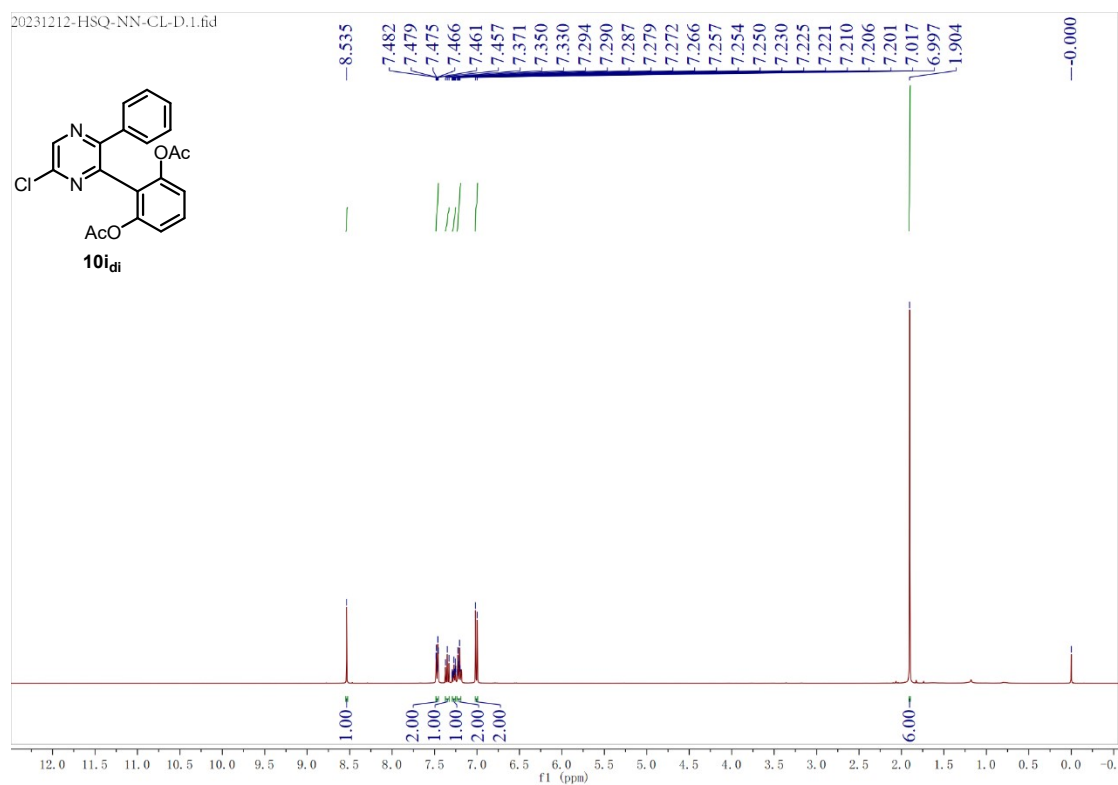

### <sup>13</sup>C NMR (100 MHz, CDCl<sub>3</sub>)

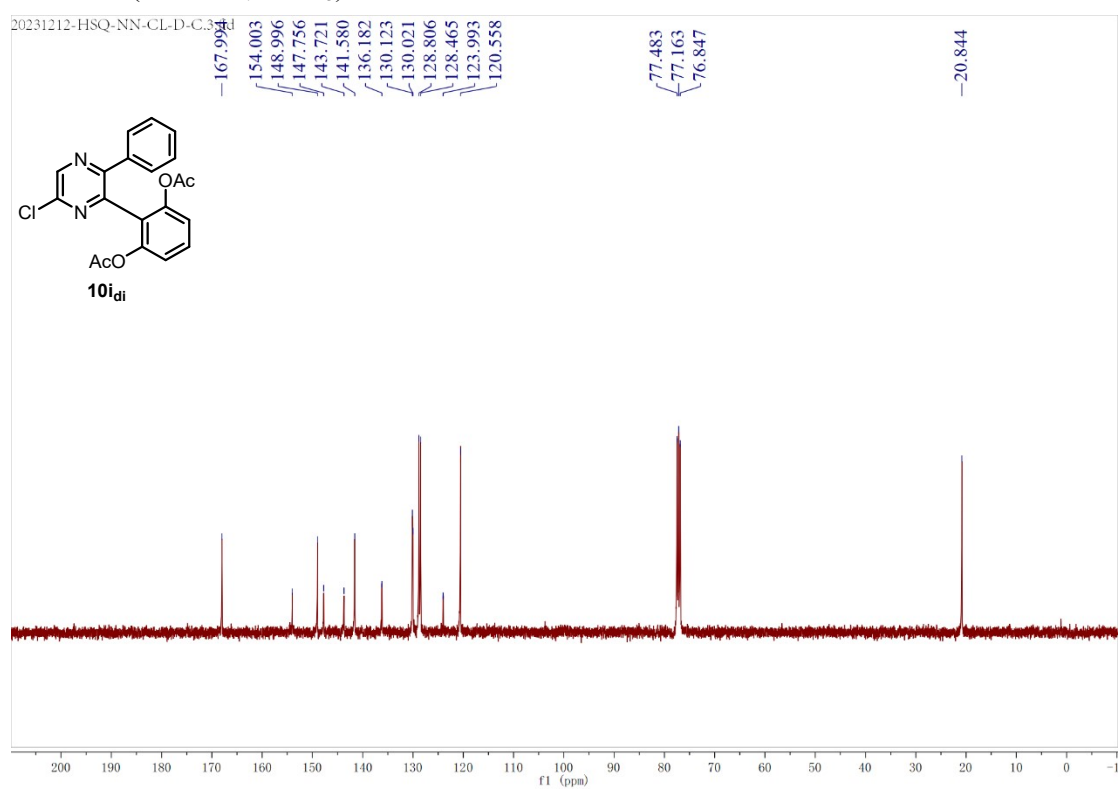

2-(2-iodophenyl)pyridine (**11**)

**<sup>1</sup>H NMR (400 MHz, CDCl<sub>3</sub>)**

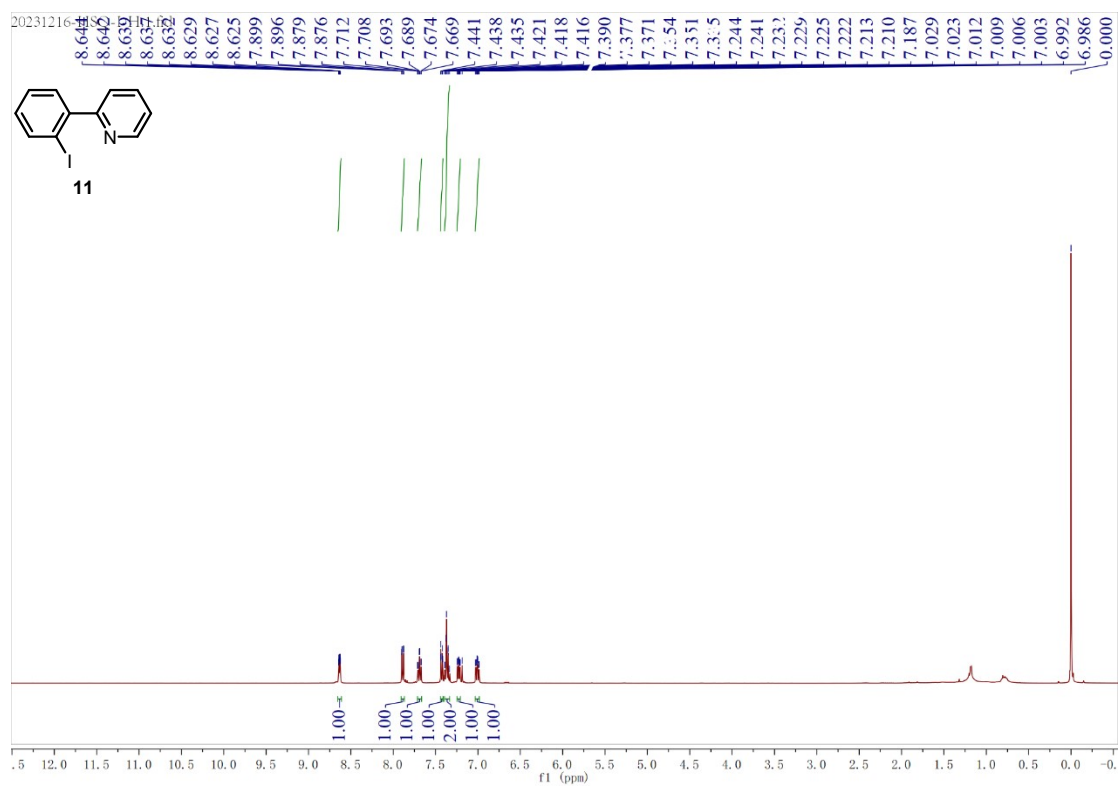

**<sup>13</sup>C NMR (100 MHz, CDCl<sub>3</sub>)**

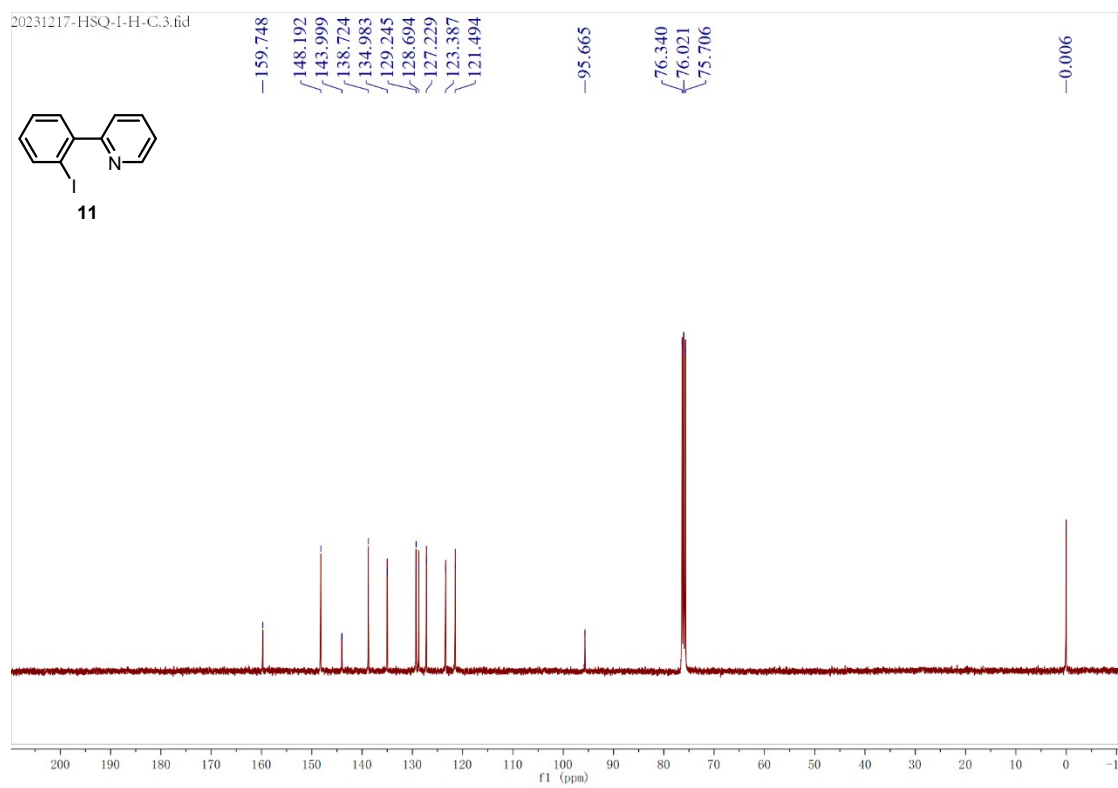

2-(2,4-dinitrophenyl)pyridine (**12**)

**<sup>1</sup>H NMR (400 MHz, CDCl<sub>3</sub>)**

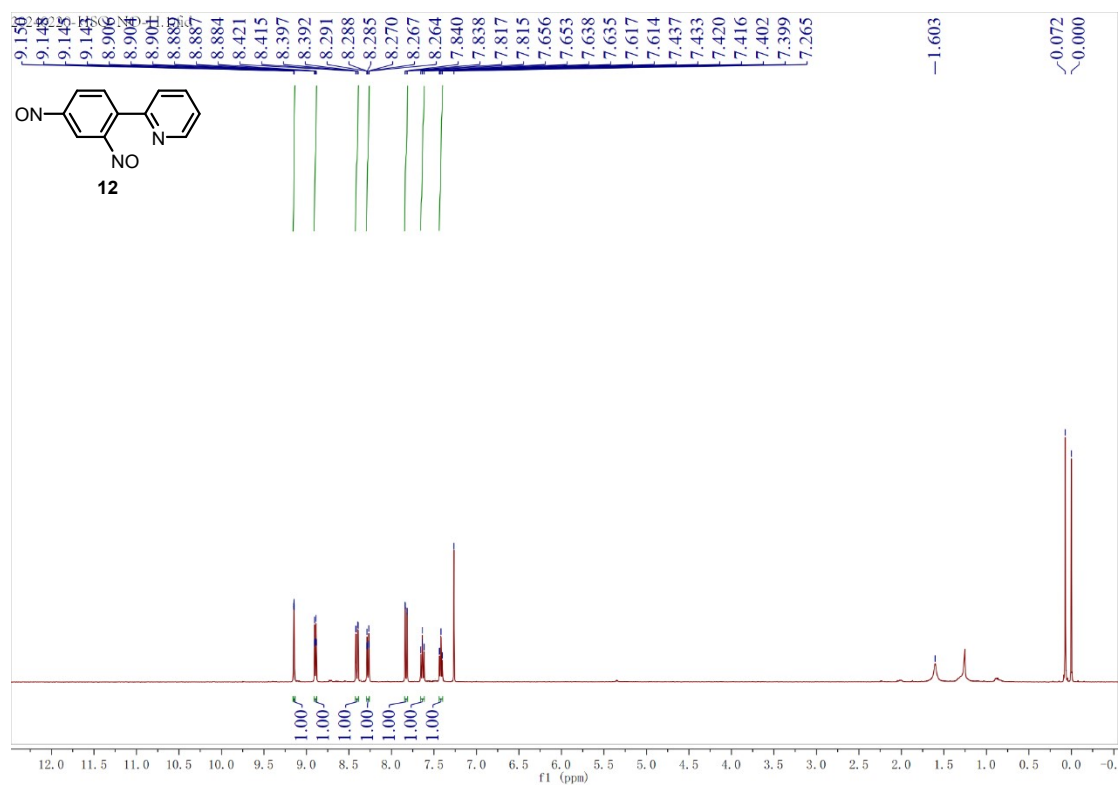

**<sup>13</sup>C NMR (100 MHz, CDCl<sub>3</sub>)**

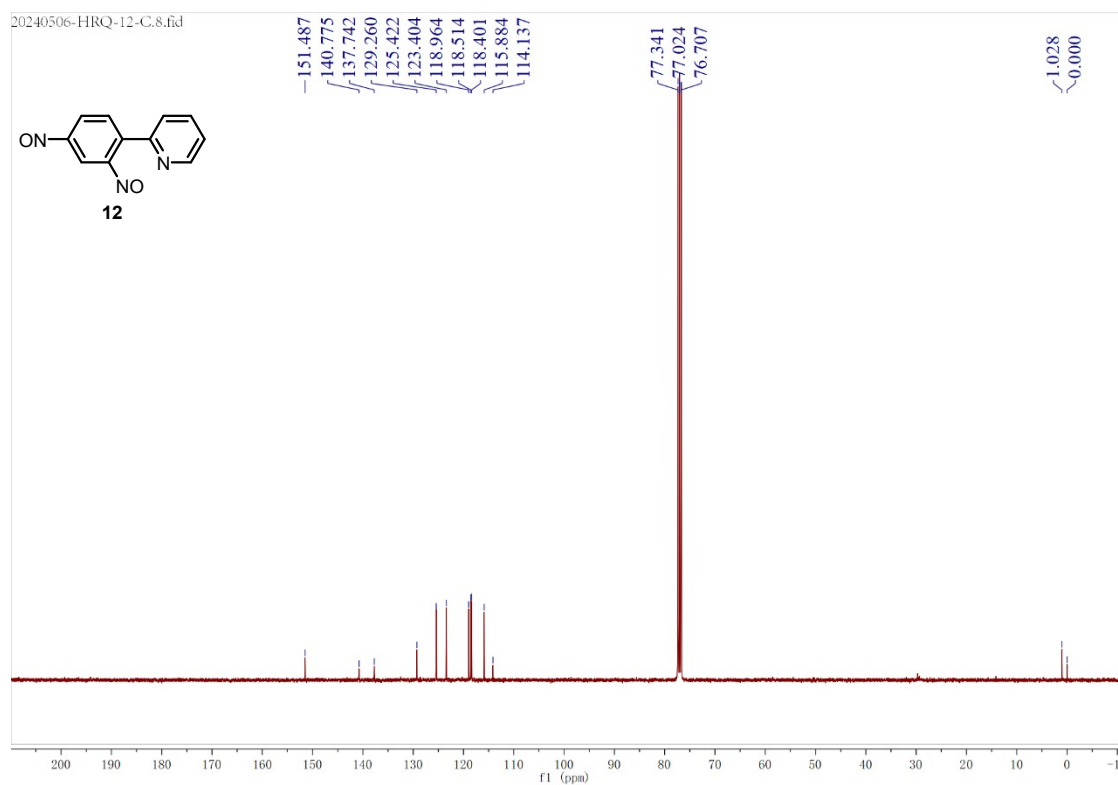

Supplement: d4re00140k1.pdf [file d4re00140k1.pdf]
